# Supplementary material for: Association between fetal sex and metabolic syndrome in women aged 40 years and older: the REACTION study
Source: PeerJ. 2025 Apr 28;13:e19380. doi: 10.7717/peerj.19380 (PMC12045278; doi:10.7717/peerj.19380)
Supplement: Supplemental Information 1 [file peerj-13-19380-s001.xlsx]

## Sheet: Sheet3
ID	GENDER:1male2female	Fetal sex1：1male2female	Years	Has diabetes been diagnosed: 1 Yes 2 No	Educational Level:1 Illiterate or Semi-literate，2 Elementary School，3 Junior High School，4 Senior High School or Vocational School，5 College or Above	Has hypertension been diagnosed: 1 Yes 2 No	Has hyperlipidemia been diagnosed: 1 Yes 2 No	Has MASLD been diagnosed: 1 Yes 2 No	Family history of diabetes and cancer: 1 Yes 2 No	SBP1(mmHg)	SBP2(mmHg)	SBP3(mmHg)	Average SBP	DBP1(mmHg)	DBP2(mmHg)	DBP3(mmHg)	Average DBP	Heightcm	Weightkg	WCcm	BMI	FPG	2h-PG	HbA1c	TG	HDL-C	LDL-C
100200002	2	1	58	2	2	2	2	2	2	164	150	149	154.333	95	97	94	95.3333	152.5	49.2	71.1	30.5724	4.92	7.25	5.8	1.1	1.23	1.7
100200009	2	1	66	2	5	1	1	2	2	183	170	164	172.333	90	95	93	92.6667	157.2	60.5	95.8	38.7668	5.42	6.16	5.5	1.17	0.86	2.19
100200012	2	2	52	2	3	2	2	1	2	104	96	98	99.3333	56	60	58	58	147.8	45.8	76.5	35.0197	5.19	8.53	6.5	2.03	1.13	3.73
100200015	2	2	53	2	3	2	2	1	1	141	140	139	140	83	82	79	81.3333	161.8	73.4	89.3	34.111	4.81	8.07	6	1.17	1.08	2.74
100200016	2	2	58	2	3	2	2	2	1	111	111	111	111	68	71	70	69.6667	156.8	56.5	77.2	31.3997	5.91	6.38	6.2	0.38	1.6	1.32
100200020	2	1	53	2	3	2	2	2	1	112	106	97	105	72	74	71	72.3333	158.1	49.5	76.3	30.5254	5.43	8.69	6	1.75	1.07	2.97
100200022	2	2	54	1	3	2	2	1	2	119	118	126	121	88	77	87	84	145.3	72.5	98.1	46.4663	7.09	12.78	6.5	1.28	1.17	2.37
100200025	2	2	83	2	1	2	2	2	2	141	137	137	138.333	63	59	59	60.3333	140.5	45.1	82.8	41.9448	5.9	8.71	6.3	1.08	0.71	1.46
100200029	2	2	48	2	4	2	2	2	1	118	125	122	121.667	85	81	83	83	162.3	72.5	89.1	33.8252	6.03	8.4	6.4	3.31	0.74	1.74
100200034	2	2	49	2	4	2	2	2	1	114	100	107	107	72	63	63	66	161.2	55.5	74.5	28.6699	5.26	5.62	5.8	0.8	1.64	2.6
100200046	2	2	44	2	2	2	2	2	2	130	108	108	115.333	72	70	75	72.3333	149.5	46.5	56.5	25.2794	5.77	5.87	5.6	0.62	0.64	1.07
100200047	2	2	55	2	2	1	2	2	2	149	137	133	139.667	89	84	78	83.6667	153.1	54.5	82.1	35.0262	5.83	11.26	5.9	1.42	1.11	1.77
100200048	2	1	52	2	4	2	2	2	1	138	126	122	128.667	76	77	72	75	149.8	59	64.8	28.877	5.07	8.96	5.4	0.81	0.97	2.14
100200049	2	1	64	2	4	2	2	2	2	147	149	147	147.667	86	81	82	83	150.8	49.2	71.2	31.3096	6.59	10.8	6.3	1.01	1.01	2.94
100200052	2	2	59	2	3	2	2	2	2	107	95	103	101.667	76	71	75	74	157.9	54	77.5	31.084	5.66	10.36	6.2	0.67	1.23	1.83
100200054	2	1	68	2	2	2	2	2	1	118	110	111	113	64	69	68	67	147.3	52.3	75	34.5665	5.48	11.56	6.2	0.88	1.36	2.92
100200060	2	1	57	2	3	2	2	2	1	146	128	135	136.333	85	78	87	83.3333	151.3	53.5	71.3	31.1467	5.17	6.67	5.6	0.7	1.46	3.71
100200063	2	2	70	2	3	2	1	2	2	143	128	127	132.667	80	76	76	77.3333	146.2	63.5	85.5	40.001	6.94	15.06	6.8	2.73	1.12	2.78
100200069	2	2	58	2	3	2	2	2	2	111	113	112	112	79	86	84	83	164.8	73.5	91.5	33.6904	8.27	9.79	6.7	1.51	1.39	2.2
100200070	2	2	55	2	3	1	2	2	1	146	134	131	137	87	85	85	85.6667	157.5	63.2	86	34.6687	4.97	7.27	5.7	1.73	1.27	3.09
100200074	2	2	74	2	2	1			2	192	190	190	190.667	82	80	84	82	147.5	54.5	94	43.206	5.99	7.5	6	0.87	1.58	4.15
100200075	2	1	60	2	3				2	104	109	100	104.333	60	63	61	61.3333	145.5	37.5	67.8	32.0261	5.21	4.68	5.7	0.56	1.51	1.87
100200078	2	1	76	2	1				2	169	161	152	160.667	95	92	92	93	150.2	52.8	96.2	42.6418	5.37	7.19	6.4	2.14	1.24	2.34
100200079	2	2	84	2	2	1	2	2	2	146	137	132	138.333	65	69	71	68.3333	150	65.1	89.8	39.9111	7.88	19.49	6.6	2.39	1.17	2.95
100200080	2	2	49	2	5	2	2	2	2	129	118	120	122.333	63	66	64	64.3333	155.5	53.5	81.1	33.5398	5.68	7.93	5.7	0.81	1.38	1.98
100200081	2	1	53	2	5	2	2	2	1	105	105	105	105	64	63	63	63.3333	153.5	46.7	64.7	27.4592	5.17	5.92	5.8	0.73	1.1	1.32
100200089	2	2	63	1	4				2	112	107	121	113.333	75	76	74	75	160.3	46.2	64.3	25.0233	5.18	10.24	6.1	2.55	1.48	2.32
100200094	2	2	62	2	4	2	2	1	2	130	130	122	127.333	83	81	84	82.6667	154.3	58.5	76.3	32.0474	5.56	7.13	6	1.7	1.02	3.2
100200098	2	1	62	2	1	2	2	2	2	123	125	129	125.667	70	69	75	71.3333	160.8	65	96.8	37.4372	5.25	8.99	5.8	1.27	0.92	2.61
100200099	2	1	44	2	4	2	2	1	2	119	121	116	118.667	81	86	91	86	160	59	80	31.25	5.04	7.13	5.9	1.21	1.47	2.71
100200103	2	2	52	2	3	2	2	2	1	117	117	109	114.333	74	71	74	73	153.4	57.1	74.3	31.5746	5.31	7.07	5.7	0.47	0.57	1.19
100200104	2	1	54	2	1	2	2	2	2	143	135	136	138	92	95	90	92.3333	150.3	69.5	92.3	40.8586	5.99	7.56	6.3	3.23	0.68	1.89
100200108	2	2	56	2	3	2	2	2	2	130	134	134	132.667	97	99	100	98.6667	156	62	84	34.5168	5.64	6.71	6.1	1.16	0.59	1.36
100200109	2	2	61	2	1	2	2	2	2	106	115	107	109.333	76	81	76	77.6667	153.2	61	88.3	37.6221	5.35	6.43	6.2	1.75	0.93	2.49
100200112	2	1	54	2	4	2	2	2	1	112	114	105	110.333	72	72	76	73.3333	154.5	50	64	26.8116	4.34	4.36	5.5	1.72	1.21	2.92
100200113	2	2	54	2	3	2	2	1	1	104	101	114	106.333	78	78	81	79	162	58	72	27.4348	6.22	9.26	6.1	1.31	1.01	2.52
100200114	2	1	59	2	1	2	2	2	2	118	114	94	108.667	82	87	67	78.6667	156	66.6	93.2	38.2972	5.77	6.77	5.8	0.54	0.78	1.56
100200117	2	1	62	2	2	2	2	2	1	155	133	136	141.333	83	76	74	77.6667	148	56	78	35.6099	5.15	12.3	6.1	3.13	0.95	2.88
100200127	2	1	62	2	4	2	2	2	2	128	106	121	118.333	83	81	85	83	143.7	43.5	66	31.9617	5.19	5	5.7	2.23	1.31	3.4
100200130	2	1	56	2	3	1	2	2	1	130	125	131	128.667	86	82	83	83.6667	161.5	86	97	37.19	7.97	15.51	6.4	2.59	0.66	1.69
100200132	2	2	59	2	2	2	2	2	2	128	118	123	123	79	76	71	75.3333	153.5	58	75	31.8306	5.72	8.32	6	1.1	1.1	3.07
100200136	2	2	54	2	3				1	137	131	117	128.333	78	71	75	74.6667	165	59	71	26.079	5.14	5.77	5.9	2.19	1.19	3.49
100200141	2	1	48	2	4	2	2	2	1	122	112	108	114	74	79	80	77.6667	165	63.5	73	26.8136	5.65	11.65	5.5	2.66	1.01	2.26
100200143	2	2	59	2	3	2	2	1	1	142	133	113	129.333	63	72	68	67.6667	150.5	57.5	75	33.1122	5.61	7.7	6.3	1.95	1.42	3
100200152	2	2	43	2	5	1	2	2	1	150	148	138	145.333	98	101	91	96.6667	168	62	74.5	26.396	5.49	7.65	6	0.82	1.08	1.99
100200159	2	1	55	2	3	2	1	2	2	151	155	157	154.333	109	108	105	107.333	152.5	61.5	88	37.8393	6.18	13.98	7	1.27	1.36	3.41
100200160	2	1	71	2	2	2	2	2	2	96	99	110	101.667	53	57	53	54.3333	151	57	83	36.4019	5.47	13.37	6.7	1.39	0.97	1.5
100200172	2	1	63	2	3	1	2	2	2	125	128	131	128	86	88	87	87	150.5	55.5	82.5	36.4234	5.27	9.6	5.9	1.4	1.38	1.15
100200179	2	1	50	1	3	1	2	1	1	156	152	142	150	102	97	94	97.6667	157.5	95.5	115	46.3593	15.18	18.4	11.1	1.26	0.91	1.83
100200180	2	2	53	2	2	2	2	2	1	110	110	103	107.667	72	70	68	70	144	42	84	40.5093	5.24	6.89	6.1	0.79	1.66	2.5
100200181	2	2	51	2	3	2	2	2	2	127	130	116	124.333	93	85	93	90.3333	152.5	45	75	32.2494	4.81	6.43	5.7	1.86	0.81	3.14
100200184	2	2	40	2	5	2	2	2	2	130	107	108	115	73	69	66	69.3333	160	60	78	30.4688	5.19	5.32	5	1.01	0.8	1.79
100200188	2	2	46	2	2	2	2	2	2	113	110	99	107.333	69	69	62	66.6667	162	61	84	32.0073	5.25	8.97	5.5	1.22	0.76	1.14
100200190	2	2	58	2	3	1	2	2	2	151	144	125	140	76	78	73	75.6667	155	66	87	36.2123	5.48	7.71	5.4	1.27	0.76	2.01
100200193	2	1	56	2		2	2	2	2	104	114	120	112.667	75	66	69	70	151.5	67	91	39.6475	5.39	6.64	5.5	0.8	1.2	2.46
100200202	2	1	54	2	3	2	2	2	2	145	133	132	136.667	95	85	84	88	154	67.5	98	41.3223	7.55	7.55	5.7	1.28	0.84	2.16
100200203	2	2	55	2	2	2	2	2	2	120	117	118	118.333	81	81	77	79.6667	147.5	64.5	92	42.2867	6.61	10.98	6.9	2.24	0.61	1.62
100200207	2	2	52	2	3	2	2	2	2	142	138	127	135.667	71	74	71	72	152.9	62.1	84.9	36.3156	6.29	14.49	5.5	0.93	0.73	0.73
100200214	2	1	58	2	3	1	2	2	2	170	182	178	176.667	92	92	92	92	148.5	47	67	30.3824	4.54	7.44	5.7	0.54	1.14	0.96
100200216	2	2	76	2	1	2	2	2	2	140	138	135	137.667	73	63	72	69.3333	150.1	57.2	104	46.1607	5.82	13.62	6.9	2.08	1.37	3.53
100200218	2	2	47	1	3	2	2	2	1	125	139	105	123	78	71	77	75.3333	157	56	84	34.0785	12.29	22.62	8.6	6.2	1.42	7.08
100200219	2	2	52	1	3	1	2	1	2	139	131	137	135.667	92	82	84	86	153.9	63	91.1	38.4628	6.05	14.02	6.7	0.88	1.2	2.03
100200221	2	1	63	2	3	1	2	2	2	118	117	115	116.667	88	87	86	87	151.6	62.5	87	37.8548	6.2	9.06	5.6	2.6	0.86	2.28
100200224	2	1	72	2	4	1	2	2	2	140	143	142	141.667	90	84	83	85.6667	151	51	78	34.209	5.8	9.96	6	3.59	1.19	2.51
100200230	2	1	56	2	3	2	2	2	2	123	111	109	114.333	78	75	73	75.3333	153.1	60	85	36.2634	5.46	6.71	5.7	0.36	0.69	1.58
100200233	2	2	63	1	4	2	2	2	2	151	132	130	137.667	87	81	79	82.3333	154	57	82	34.5758	8.45	16.2	7.9	1.32	1.47	2.77
100200238	2	2	74	2	3	2	2	2	2	104	106	102	104	59	54	58	57	159.5	48	74	29.0878	5.38	6.99	6	1.04	1.16	2.14
100200252	2	1	58	2	3	2	2	2	2	124	112	114	116.667	64	63	64	63.6667	154.1	46.5	71	29.8988	5.03	5.28	6.4	0.42	1.74	2.01
100200255	2	1	58	2	2	2	2	2	1	128	102	104	111.333	78	67	66	70.3333	151.5	53	87	37.9048	5.85		6.8	1.36	1.03	1.95
100200256	2	2	58	1	2	1		1	1	108	108	109	108.333	81	75	72	76	148.5	64	94.8	42.9888	9.11		7.3	2.44	0.74	1.36
100200258	2	2	64	2	2	2	2	2	2	108	102	104	104.667	69	59	61	63	148	49	82	37.4361	5.3	6.01	5.6	1.79	1.32	3.16
100200265	2	2	84	2	3	1	2	2	2	168	168	150	162	74	76	71	73.6667	154	48	84	35.4191	5.45	11.58	6.3	1.58	0.78	2.15
100200266	2	2	42	2	3	2	2	1	1	129	128	121	126	86	88	84	86	152	58.5	90	38.9543	5.87	16.48	6.4	1.55	0.56	1.22
100200268	2	2	44	1	3	2	2	2	1	121	116	133	123.333	80	79	83	80.6667	151.5	62	96	41.826	5.92	14.91	8.8	0.49	0.64	0.88
100200270	2	1	59	2	5	2	2	2	1	106	112	118	112	81	76	91	82.6667	150.2	56	83	36.7907	5.54	7.85	6.6	1.61	0.73	1.47
100200275	2	1	61	1	3	1	1	2	2	151	147	144	147.333	93	96	90	93	155.5	58	93.5	38.6679	12.73	14.27	9.7	3.78	1.23	4.2
100200276	2	1	59	1	3	2	2	2	1	138	118	119	125	66	70	72	69.3333	162.8	41.8	65.3	24.6379	10.42	17.11	8	0.57	0.9	2.04
100200278	2	1	59	2	3		2	2	2	151	145	135	143.667	101	77	78	85.3333	164	58.5	85	31.6032	4.91	6.54	6	1	0.79	2.49
100200279	2	1	52	2	2	2	2	2	2	147	145	143	145	89	81	82	84	154.1	50.5	73.2	30.8252	5	6.07	5.5	1.36	1.38	5.4
100200281	2	1	56	2	3	1	2	2	2	159	146	138	147.667	99	97	99	98.3333	152	49	81	35.0589	5.29	6.07	6.3	0.95	1.15	2.6
100200283	2	2	59	2	3	2	2	2	2	125	117	119	120.333	64	68	65	65.6667	156.8	49.9	68	27.6577	5.19	6.39	5.5	1.84	0.65	1.61
100200284	2	1	56	2	3	2	2	2	1	105	105	106	105.333	68	66	63	65.6667	146.3	49.3	64.2	29.9948	6.37	8.69	6.5	1.09	1.45	1.38
100200289	2	2	58	2	3	2	2	2	1	111	104	102	105.667	70	70	69	69.6667	155.3	44.8	66.3	27.4897	5.2	6.04	6.1	0.82	1.59	2.18
100200294	2	2	46	2	4	2	2	2	2	139	188	139	155.333	80	89	78	82.3333	165	67.3	78	28.6501	8.7	8.6	5.5	1.01	0.74	1.42
100200295	2	2	57	2	3	2	2	2	2	99	98	98	98.3333	55	56	61	57.3333	154.8	44	57	23.7866	5.19	7.08	5.9	1.07	1.45	1.63
100200296	2	2	60	2	2	2	2	2	2	156	132	148	145.333	79	79	76	78	151.5	48	82	35.7263	5.88	8.04	6.2	1.02	0.89	2.69
100200300	2	2	45	2	4	2	1	1	1	128	125	117	123.333	75	77	76	76	151.4	58.3	61.5	26.8302	5.22	8.89	6.6	0.87	0.94	2.34
100200303	2	1	56	2	2	2	2	2	2	173	148	147	156	78	68	71	72.3333	157.1	56.5	74.2	30.0643	5.32	15.34	5.4	1.26	1.64	3.38
100200304	2	1	55	2	3	2	2	2	2	147	155	148	150	100	105	102	102.333	147.9	43.1	67.1	30.6751	5.64	10.25	5.1	1.67	1.07	1.96
100200306	2	1	41	2	5	2	2	2	1	172	141	146	153	94	90	88	90.6667	157.8	63	73.3	29.4368	6.63	13.32	6.5	1.44	0.94	2.54
100200307	2	1	53	2	3	2	2	2	1	122	106	106	111.333	82	74	75	77	142.8	42.8	66.3	32.513	6.05	7.13	5.8	1.21	1.56	2.86
100200308	2	1	55	2	3	2	2	2	2	154	135	149	146	82	77	76	78.3333	162.8	60.1	83.2	31.3917	5.69	6	5.9	1.19	1.09	2.72
100200313	2	1	61	2	4	1	1	2	2	129	120	130	126.333	77	81	81	79.6667	149.2	58.1	86.1	38.6781	5.61	7.09	6.2	2.34	1.02	3.33
100200318	2	1	55	2	4	2	2	2	2	103	99	99	100.333	61	64	58	61	150.3	64.5	77	34.0857	5.68	7.42	6	0.82	0.9	1.78
100200320	2	2	61	2	3	2	2	2	2	173	144	165	160.667	73	82	80	78.3333	147.1	53.5	81	37.4334	5.27	7.14	5.7	2.53	1.12	2.1
100200322	2	1	62	2	2	2	2	2	2	155	152	145	150.667	84	87	84	85	146.8	58.8	76.3	35.4056	5.05	7.08	5.8	7.02	0.78	3.07
100200324	2	1	63	2	2	2	1	2	2	100	105	107	104	60	62	63	61.6667	161.3	52.1	76.1	29.2493	5.3	4.73	5.7	0.75	1.14	2.76
100200327	2	2	86	2	1	2	2	2	2	155	133	131	139.667	61	60	59	60	140	41.5	72	36.7347	4.91	8.35	5.5	0.66	1.26	2.44
100200330	2	2	56	2	3	2	2	2	2	126	119	122	122.333	81	76	86	81	145	53	80	38.0499	5.23	5.34	6.1	0.82	1.3	2.49
100200338	2	1	62	2	4	1	2	2	2	145	142	123	136.667	76	75	68	73	154.1	69.5	100.2	42.1951	5.72	13.97	6.3	2.16	0.8	1.23
100200342	2	2	43	2	3	2	2	2	1	140	134	132	135.333	101	96	98	98.3333	159.1	61.5	98.2	38.7946	5.61	6.05	5.5	1.72	1.05	1.54
100200345	2	1	63	2	1	2	2	2	2	141	135	140	138.667	72	71	70	71	146.1	51.2	90.1	42.2109	5.31	5.72	5.9	0.59	0.99	1.68
100200351	2	2	59	1	3	1	2	1	1	147	128	132	135.667	76	74	75	75	151.8	66.5	89.2	38.7098	5.7	8.76	6.3	1.55	1.26	2.37
100200356	2	2	49	2	3	2	2	2	2	112	108	111	110.333	74	71	66	70.3333	152.2	50.1	81.1	35.01	5.3	6.05	6.2	1.74	1.35	2.47
100200358	2	2	43	2	4	2	2	2	1	108	95	99	100.667	71	72	68	70.3333	161.2	68.5	93.2	35.8662	5.04	5.49	5.7	1.11	1.07	1.64
100200363	2	2	54	2	4	2	2	2	1	117	99	101	105.667	62	59	65	62	157.8	58.8	83.2	33.4125	5.53	6.82	6.2	0.91	1.26	2.44
100200365	2	1	62	2	4	2	2	1	2	136	121	120	125.667	84	79	79	80.6667	156.3	56.8	87.2	35.6943	5.41	6.83	6	1.42	1.19	2.86
100200377	2	1	41	2	3	2	2	2	1	96	90	87	91	61	63	61	61.6667	152.8	51.5	89.1	38.162	4.72	5.03	5.5	0.32	1.35	1.33
100200382	2	2	63	2	2	2	2	2	1	115	119	111	115	67	68	63	66	151.8	57.5	91.8	39.8381	5.96	8.57	5.7	1.24	0.94	1.43
100200384	2	1	50	2	3	2	2	2	1	124	115	110	116.333	81	88	84	84.3333	147.1	51.8	84.4	39.0047	5.09	5.02	5.8	0.62	1.01	2.09
100200386	2	2	59	2	4	2	2	2	1	155	149	145	149.667	85	89	91	88.3333	145.1	54.5	86.1	40.8948	5.79	7.8	5.6	1.12	0.68	1.8
100200390	2	1	56	2	4	2	2	2	2	124	112	108	114.667	82	71	71	74.6667	152.5	50.5	69.5	29.8844	5.34	7.79	6.4	0.6	1.94	2.3
100200391	2	2	56	2	3	2	2	2	1	123	120	115	119.333	60	73	73	68.6667	154.5	60.2	88.1	36.9079	5.79	8.94	6.1	1.05	1.28	3.6
100200392	2	2	54	2	5	2	2	2	2	107	104	102	104.333	65	64	65	64.6667	160.5	56.5	72.2	28.0277	4.86	3.92	5.8	0.55	1.93	2.77
100200397	2	1	60	2	3	2	2	2	1	100	98	97	98.3333	57	56	57	56.6667	153.5	47.5	76.1	32.2974	6.36	4.32	6.2	0.61	1.42	2.03
100200410	2	2	53	2	4	2	2	2	2	104	101	100	101.667	68	75	76	73	160.1	65.1	88.1	34.3711	4.72	5.4	5.3	1.68	0.71	1.74
100200417	2	2	54	2	3	2	2	2	2	112	106	110	109.333	64	63	61	62.6667	145.2	48.5	78.5	37.2337	4.65	5.23	5.5	0.45	1.66	1.72
100200420	2	2	50	2	4	1	2	2	2	149	145	129	141	96	93	94	94.3333	152.4	55.5	92.5	39.8265	5.08	6.83	5.2	1.33	1.55	2.2
100200421	2	2	60	2	5	2	2	2	2	107	104	96	102.333	69	67	70	68.6667	156.2	56.1	76.1	31.1905	5.35	6.65	6	0.72	0.95	2.04
100200422	2	1	44	2	2	2	2	2	2	114	105	114	111	78	77	79	78	156.5	51.8	75.1	30.6628	5.48	6.86	5.6	0.61	1.35	1.5
100200430	2	1	46	2	2	2	2	2	1	102	99	100	100.333	70	70	71	70.3333	148.5	44.5	66.1	29.9743	5.41	8.26	5.7	1.28	1.43	2.93
100200436	2	1	64	2	4	1	2	2	1	118	124	121	121	88	88	81	85.6667	155.1	57.5	91.5	38.0362	8.54	19	7.1	1.25	0.78	2.02
100200440	2	2	48	2	4	2	2	2	2	150	146	136	144	93	95	91	93	164.5	60.5	83.1	30.7093	5.11	5.62	5.3	0.92	1.21	2.43
100200441	2	1	59	2	3	2	2	2	1	129	132	132	131	88	82	76	82	160.2	54.1	75.1	29.2627	4.79	8.34	5.7	0.68	1.03	2.12
100200442	2	2	56	2	3	2	2	2	1	150	141	140	143.667	95	94	94	94.3333	174.8	57.5	84.4	27.6223	4.5	7.95	6.1	1.38	0.97	2.94
100200443	2	2	56	2	4	2	2	2	1	107	104	104	105	66	64	66	65.3333	154.1	55.1	77.4	32.5939	4.79	9.29	6.4	0.63	0.8	1.32
100200445	2	1	47	2	4	2	2	2	1	101	98	96	98.3333	67	66	63	65.3333	162.1	62.5	94.1	35.8116	5.51	5.29	5.8	0.57	0.74	1.45
100200456	2	2	69	2	1	2	2	2	2	142	124	121	129	73	70	70	71	148.6	45.5	80	36.2287	5.71	6.57	6	1.29	1.03	2.11
100200459	2	2	52	2	4	2	2	2	2	132	112	119	121	81	81	79	80.3333	158	60.4	85	34.049	5.95	5.64	5.2	0.91	1.36	2.62
100200462	2	1	59	2	2	2	2	2	2	123	125	123	123.667	84	78	76	79.3333	157.5	75	90	36.2812	5.68	9.27	5.7	2.65	0.87	1.47
100200464	2	1	63	2	3	2	2	1	2	148	177	153	159.333	98	109	105	104	154.2	72	107	45.0003	6.87	12.54	6.8	1.25	1.06	2.57
100200465	2	2	65	2	4	1	1	1	2	125	125	116	122	77	80	75	77.3333	166.6	69	85	30.6245	5.84	7.42	5.8	2.13	1.27	3.92
100200468	2	1	60	2	1	2	2	2	2	120	125	130	125	70	72	76	72.6667	160	67	90.5	35.3516	5.55	7.15	6.1	1.49	0.94	3.18
100200473	2	2	63	2	2	2	1	2	2	114	112	110	112	70	70	70	70	155.5	57.5	89	36.8069	5.61	6.61	6.4	0.96	1.37	2.5
100200478	2	2	57	2	2	2	2	2	2	120	134	140	131.333	66	72	84	74	159.9	70	90	35.2002	5.88	7.06	6.2	0.84	1.24	2.73
100200483	2	2	56	2	1	2	2	2	2	149	146	134	143	88	93	95	92	151.4	57.6	86	37.5186	5.87	9.5	6.8	3.39	1.01	2.46
100200485	2	1	58	2	3	2	2	2	2	108	104	103	105	67	70	69	68.6667	153.6	50	76	32.213	5.76	10.45	6	0.54	1.25	1.65
100200486	2	1	60	2	3	2	2	2	2	139	137	142	139.333	74	67	76	72.3333	168.2	68	85	30.0446	5.58	5.88	4.7	1.26	0.97	1.45
100200489	2	2	62	2	1	2	2	2	2	138	133	126	132.333	79	80	76	78.3333	144.6	43.3	74	35.3912	5.59	7.75	6.3	0.75	1.78	3.32
100200490	2	2	50	2	5	2	2	2	1	108	102	90	100	75	68	68	70.3333	155.2	44	74	30.7219	6.13	8.39	6.7	1.56	1.75	2.24
100200491	2	1	61	2	3	2	2	1	2	118	113	107	112.667	71	68	61	66.6667	152	58.2	82	35.4917	5.56	5.51	6.5	0.99	1.51	4.53
100200494	2	2	40	2	4	2	2	2	1	93	89	89	90.3333	64	62	64	63.3333	157	42	70	28.3987	5.21	5.73	5.3	0.67	1.19	1.96
100200498	2	1	60	2	2	2	2	2	2	138	136	129	134.333	79	77	74	76.6667	149.1	61	87	39.1349	5.13	8.87	6	1.24	1.22	2.1
100200501	2	1	47	2	4	2	2	2	2	101	100	110	103.667	80	82	84	82	152	51	62	26.8352	4.47	5.58	5.2	0.48	0.79	1.58
100200504	2	2	60	2	3	2	2	2	2	123	111	100	111.333	80	74	70	74.6667	150	52.5	75	33.3333	4.95	6.23	5.6	1.08	0.73	1.5
100200506	2	1	69	2	4	2	2	2	1	126	120	131	125.667	75	79	78	77.3333	160.5	58	79	30.6674	5.76	7.72	6.4	0.48	1.05	2.19
100200509	2	1	54	2	4	1	2	2	1	146	128	123	132.333	80	78	76	78	164.5	71.5	85.5	31.5962	5.55	16.2	5.4	1.21	0.73	2.16
100200515	2	1	59	2	4	2	2	2	2	150	149	148	149	86	89	85	86.6667	162	72.5	90	34.2936	5.89	7.66	6.2	1.75	1.4	2.31
100200516	2	1	61	2	3	2	2	1	1	140	120	113	124.333	78	86	85	83	156	47	68	27.9421	5.42	7.74	6	2.48	1.15	1.73
100200521	2	2	54	1	4	2	1	1	1	119	110	109	112.667	74	74	74	74	157	51.5	70	28.3987	7.1	11.53	7.1	0.86	0.58	1.31
100200524	2	2	58	2	3	2	2	2	1	111	103	107	107	73	68	67	69.3333	152	50	71.5	30.947	6.13	8.39	6.1	1.14	0.99	2.7
100200526	2	2	59	2	3	2	2	2	1	114	129	121	121.333	85	92	87	88	150	50.5	80	35.5556	5.3	7.03	6	4.59	0.97	2.37
100200527	2	1	52	2	2	1	2	2	2	150	141	130	140.333	76	74	72	74	154	66.5	88	37.1058	6.18	10.61	6.3	0.93	0.91	2.3
100200534	2	2	40	2	4	2	2	2	2	105	103	99	102.333	71	70	70	70.3333	150	41	60	26.6667	4.68	6.46	5.3	0.5	1.9	2.04
100200536	2	1	49	2	4	2	2	2	1	115	114	114	114.333	69	66	70	68.3333	160.5	62.5	77	29.891	5.38	6.46	6.6	0.79	1.52	2.99
100200538	2	1	50	2	4	2	2	2	1	119	115	112	115.333	77	85	78	80	154	53.5	70	29.5159	5.75	6.14	5.2	1.16	1.49	3.22
100200539	2	1	52	2	3	1	2	2	2	151	138	127	138.667	93	93	90	92	154	67	93.5	39.4249	5.42	9.57	5.1	3.25	0.89	1.9
100200543	2	2	55	2	4	2	2	2	1	144	142	143	143	67	70	70	69	162	59.5	92	35.0556	6.43	8.08	6	0.76	1.19	2.53
100200545	2	2	54	2	3	2	2	2	1	101	101	100	100.667	62	58	61	60.3333	155	70.5	89	37.0447	4.97	8.07	6.4	0.99	1.23	3.04
100200548	2	2	52	2	4	2	2	2	2	135	116	107	119.333	56	66	68	63.3333	158	62	84	33.6485	6.72	12.48	5.8	0.8	1.06	2.09
100200551	2	1	51	1	3	1	2	2	1	188	162	184	178	113	104	108	108.333	158.5	46.5	66	26.2715	16.42	23.48	5.7	0.96	1.22	1.37
100200555	2	2	54	2	2	2	2	2	2	105	101	105	103.667	62	60	61	61	150	50	80	35.5556	5.08	6.53	5.9	1.55	0.99	1.83
100200562	2	1	40	2	4	2	2	2	1	110	106	99	105	83	80	71	78	153	61	75	32.039	5.03	7.87	5.6	1.18	1.07	2.95
100200564	2	1	44	2	2	2	2	2	2	92	105	92	96.3333	64	60	55	59.6667	151	50.5	74	32.4547	9.72	17.58	8.6	0.53	1.06	2.25
100200571	2	1	45	2	2				2	116	136	130	127.333	94	93	91	92.6667	163.5	69	82	30.6746	5.69	6.05	5.6	0.69	0.72	2
100200572	2	1	57	2	3	2	2	2	2	123	120	116	119.667	84	78	81	81	158.5	63.5	77	30.6501	5.22	6.43	5.7	0.76	1.12	1.53
100200573	2	2	55	2	4	2	2	2	1	116	121	110	115.667	68	64	61	64.3333	160	55.5	73	28.5156	6.38	9.56	6.7	1.7	1.52	2.95
100200575	2	2	49	2	3	2	2	2	2	96	93	90	93	68	65	59	64	155.5	58	71	29.3628	5.99	7.06	5.8	0.68	1.18	1.33
100200577	2	2	52	2	4	2	2	2	2	92	93	95	93.3333	74	63	66	67.6667	148	44.5	66	30.1315	5.3	8.88	5.4	0.85	0.99	1.11
100200580	2	1	51	2	3	1	2	2	2	125	112	112	116.333	83	79	81	81	159	66.5	80	31.6443	5.43	9.03	5.7	0.48	0.89	1.38
100200583	2	2	55	2	4	2	2	2	2	110	107	101	106	69	68	62	66.3333	157	53	89	36.1069	5.5	7.03	5.8	0.73	1.36	1.65
100200586	2	1	60	2	3	1	2	2	2	141	121	129	130.333	82	78	79	79.6667	148.5	45	70	31.7428	5.67	7.75	5.5	0.78	1.13	1.48
100200588	2	2	61	2	3	2	2	2	2	143	143	116	134	89	98	82	89.6667	157	53	97	39.3525	7.18	14.53	7.1	3.38	1.19	3.23
100200590	2	1	64	2	4	2	2	2	2	145	138	143	142	96	96	89	93.6667	146	57	89	41.7527	5.64	8.28	5.2	1.21	1.56	3.22
100200595	2	2	53	2	2	2	2	1	2	128	114	114	118.667	74	71	74	73	158	57.5	93	37.2536	5.45	7.3	5.3	1.68	0.73	1.41
100200605	2	1	55	2	3	2	2	2	1	121	129	116	122	77	71	70	72.6667	143	51	81	39.6107	5.25	7.49	5.5	1.19	0.84	1.43
100200611	2	2	48	2	5	2	2	2	1	112	114	112	112.667	72	72	70	71.3333	160.8	50	70	27.0723	5.96	6.11	5.8	0.92	1.06	2.08
100200612	2	1	53	2	4				2	120	124	120	121.333	76	78	74	76	162	124	79	30.1021	5.31	7.85	6.5	1.07	1.03	0.81
100200613	2	2	64	2	4	2	2	2	2	113	110	103	108.667	73	68	66	69	150.6	49	76	33.5092	5.76	10.23	6.3	3.83	0.78	1.41
100200615	2	2	47	2	3	2	2	2	2	99	98	102	99.6667	65	63	65	64.3333	155	57	84	34.9636	4.69	7.79	5.8	1.26	1.09	1.6
100200619	2	1	51	2	3	2	2	2	1	138	140	128	135.333	86	83	83	84	164	71	91	33.834	6.31	8.71	6.5	1.63	0.63	1.86
100200621	2	2	59	2	3	2	2	2	1	137	142	137	138.667	93	89	92	91.3333	160	65	99	38.6719	5.23	10.36	6.1	1.89	0.94	2.47
100200624	2	2	46	2	4	2	2	2	2	94	92	86	90.6667	66	61	56	61	147	55	81	37.4844	5.36	7.13	5.6	1.46	1	3.39
100200632	2	1	69	2	2				2	143	133	132	136	77	75	72	74.6667	151	60	102	44.7349	6.63	13.26	5.7	1.8	1.07	2.5
100200633	2	1	75	2	2	1			2	154	159	148	153.667	75	76	73	74.6667	151	66	90	39.472	5.5	8.03	5.9	1.2	0.84	1.78
100200639	2	1	61	1	3	1	2	2	2	149	150	147	148.667	91	84	90	88.3333	152	62	94	40.6856	13.38	24.2	9.3	1.24	0.91	2.76
100200643	2	1	60	2	3	2	2	2	1	126	108	109	114.333	82	71	73	75.3333	159	55	89	35.2043	5.57	7.55	6.2	1.27	1.09	2.53
100200650	2	2	71	2	5				2	138	139	142	139.667	71	69	65	68.3333	162.5	63	87	32.9467	6.29	12.6	7.3	2.02	0.63	2.01
100200652	2	1	53	2	4	1	2	2	1	180	150	155	161.667	103	98	103	101.333	161	57	81	31.2488	4.86	4.67	5.6	0.9	1.17	2.43
100200658	2	2	53	2	4				2	95	92	90	92.3333	64	61	59	61.3333	167.5	62	78	27.8013	5.22	6.28	5.7	0.67	1.38	1.94
100200669	2	2	62	2	5	2	2	2	2	120	109	122	117	65	65	67	65.6667	148	46	71	32.4142	5.99	8.9	6.4	0.9	1.27	2.91
100200670	2	2	61	2	3				1	127	131	127	128.333	84	82	85	83.6667	162	49	74	28.1969	5.33	6.54	6.1	0.86	1.22	2.15
100200672	2	1	60	2	4	2	2	2	2	116	112	113	113.667	68	62	64	64.6667	157	44	80	32.4557	4.78	8.17	5.6	0.65	1.79	2.3
100200682	2	2	58	2	2	2	2	2	2	187	174	164	175	104	94	90	96	156	57	87	35.7495	6.61	16.53	6.6	2.98	0.82	2.26
100200684	2	2	40	2	4	1	2	2	1	132	116	118	122	85	83	74	80.6667	156	50	75	30.8185	5.04	5.44	5.2	1.02	0.86	1.76
100200693	2	2	56	2	2	2	1	2	2	112	117	112	113.667	82	82	78	80.6667	158	58	88	35.2508	5.95	6.94	6.1	2.49	1.01	1.78
100200695	2	1	59	2	3	2	2	2	1	115	109	117	113.667	78	72	74	74.6667	152.5	54	84	36.1193	5.39	8.43	6.1	2.65	0.83	1.79
100200700	2	2	53	2	4	2	2	2	2	107	110	103	106.667	66	63	66	65	161	57	80	30.863	5.41	5.34	5.5	1.42	0.73	2.14
100200701	2	2	56	1	3	2	2	2	1	144	134	144	140.667	93	96	89	92.6667	155	59	78	32.4662	7.48	15.17	6.8	2	1.26	2.34
100200705	2	2	48	2	3	2	2	2	2	155	150	158	154.333	98	96	96	96.6667	157	52	89.2	36.1881	6.37	13.22	5.4	2.15	0.74	2.04
100200706	2	2	58	2	2	2	2	2	2	113	113	115	113.667	88	76	77	80.3333	147.5	61.5	88.5	40.678	5.1	6.77	5.8	0.75	0.92	1.77
100200710	2	1	60	2	5	2	2	2	2	130	125	120	125	61	67	65	64.3333	150	44.5	62	27.5556	5.42	8.42	5.9	0.77	0.93	2.73
100200713	2	1	61	1	2	2	2	2	2	130	129	125	128	65	67	62	64.6667	153	54	81	34.6021	11.45	17.75	8.4	1.34	1.32	4.5
100200714	2	1	50	1	4	2	2	2	2	142	130	146	139.333	83	82	81	82	166	70	90	32.6608	6.34	8.24	5.7	8.99	1.1	2.15
100200722	2	1	47	2	4	1	2	2	2	140	137	127	134.667	87	88	89	88	150	59	78	34.6667	5.57	7.3	5.5	1.34	1.26	3.24
100200730	2	2	50	2	3	2	2	2	2	120	105	104	109.667	64	57	63	61.3333	156.5	56	73	29.8053	4.53	5.9	5.7	0.66	0.83	1.54
100200731	2	2	70	2	3	2		2	2	186	178	160	174.667	73	67	64	68	153	62.3	82	35.0293	5.39	7.91	5.9	1.69	1.44	2.4
100200734	2	1	59	2	3	1	2	1	2	152	149	144	148.333	99	98	80	92.3333	146.5	70.5	95	44.2638	5.3	7.88	6.2	2.57	0.93	2.17
100200735	2	1	58	2	3	2	1	2	2	122	107	113	114	82	77	75	78	152.5	56.5	76	32.6794	5.6	8.57	6	0.76	0.89	2.47
100200737	2	2	57	2	3	2	2	2	2	143	136	132	137	91	91	92	91.3333	150	51.5	79.5	35.3333	5.51	7.77	5.9	1.65	1.06	2.73
100200740	2	1	65	2	3	2	2	2	2	153	152	152	152.333	110	93	95	99.3333	149	68.5	98	44.1422	6.82	11.46	7	3.28	0.83	2.5
100200743	2	2	51	2	2	2	1	2	2	130	109	111	116.667	79	81	78	79.3333	148	45	68	31.0446	5.67	11.13	5.3	1.6	0.78	1
100200750	2	1	65	2	4	2	2	2	1	138	137	137	137.333	87	88	83	86	152	64	76	32.8947	5.51	7.72	6.3	0.96	0.9	2.35
100200753	2	1	56	2	3	2	2	2	1	129	110	115	118	70	64	66	66.6667	150	46	66	29.3333	5.31	6.18	5.6	1.51	1.12	2.97
100200754	2	2	49	2	4	2	2	2	1	107	69	93	89.6667	69	65	68	67.3333	160	57.5	72	28.125	5.77	7.67	6	0.67	0.86	1.61
100200758	2	2	54	2	4	2	2	2	2	123	119	116	119.333	79	80	71	76.6667	148.5	46	72	32.6497	6.21	10.46	6.1	0.68	1.24	2.7
100200759	2	1	52	2	2	2	2	2	2	120	115	123	119.333	71	79	80	76.6667	144	52	79	38.098	5.52	6.16	5.6	1.23	1.13	1.75
100200760	2	1	56	1	3	2	2	1	1	148	140	141	143	67	78	78	74.3333	156	60.5	84	34.5168	12.93	16.3	6.7	5.9	1.09	2.81
100200764	2	2	55	2	4	2	1	2	1	136	133	133	134	71	75	74	73.3333	159	67	80	31.6443	6.01	11.4	5.6	3.91	0.84	1.91
100200769	2	1	61	1	3	2	2	2		121	116	112	116.333	72	72	72	72	151	56	71	31.139	5.9	12.89	6.1	0.9	1.15	2.63
100200772	2	1	55	2	3	2	2	2	2	125	126	120	123.667	89	82	84	85	139.3	55	83	42.7736	6.13	15.77	6.6	1.18	0.67	1.18
100200773	2	1	64	2	3	2	2	2	2	141	121	130	130.667	82	80	75	79	150	58.5	82	36.4444	6.07	17.29		1.72	1.23	1.78
100200778	2	2	51	2	4	2	2	2	2	99	98	98	98.3333	66	67	70	67.6667	163.5	40.5	70	26.1856	4.81	4.46	4.9	0.69	1.09	1.8
100200784	2	1	56	2	3	2	2	2	2	109	109	105	107.667	71	68	64	67.6667	161.5	51.5	80.5	30.8639	4.74	4.98	5.4	0.95	1.17	2.02
100200785	2	1	57	1	3	2	2	2	1	131	126	128	128.333	89	85	91	88.3333	148.8	49.5	81.5	36.8088	7.54	10.12	6.7	1.11	1.51	2.69
100200787	2	2	57	2	3	2	2	2	2	128	125	120	124.333	69	75	68	70.6667	158.1	64.5	89.2	35.6863	5.53	6.81	5.6	0.89	1.03	1.99
100200790	2	2	62	2	3	1	1	1	2	128	134	132	131.333	88	84	84	85.3333	149.1	62.5	93.1	41.8788	6.07	5.71	5.6	2.04	0.9	1.89
100200795	2	1	48	2	4	2	2	2	1	109	107	109	108.333	74	79	74	75.6667	155	52	77	32.0499	5.38	5.87	5.8	0.75	1.07	2.83
100200796	2	2	57	2	3	2	2	2	2	155	148	137	146.667	83	70	68	73.6667	155.1	78.5	108.5	45.1031	5.56	6.93	6.3	2.27	1.19	1.98
100200798	2	2	57	2	3	2	2	2	1	105	106	103	104.667	74	71	67	70.6667	161.8	69.5	94.1	35.9445	4.87	5.6	5.7	0.75	1.01	1.11
100200800	2	1	53	2	4	2	2	2	2	113	113	107	111	72	66	66	68	153.4	63.5	94.1	39.9888	5.91	8.05	5.7	1.49	0.88	3
100200805	2	2	59	2	2	2	2	2	2	131	126	132	129.667	76	72	73	73.6667	144.6	55.1	91.5	43.7607	5.79	11.84	6.8	1.67	0.78	3.01
100200806	2	2	55	2	4	2	2	2	2	118	116	119	117.667	76	75	75	75.3333	162	47.5	59	22.4813	4.32	5.69	5.2	0.92	0.91	1.47
100200807	2	1	61	2	3	2	2	2	2	131	117	107	118.333	71	76	79	75.3333	154.6	58.4	86.1	36.0234	5.18	10.1	5.6	0.49	1.27	2.49
100200813	2	1	48	2	4	2	2	2	2	115	116	118	116.333	95	83	86	88	158.8	65.4	86.6	34.3413	5.44	9.26	5.3	0.97	1.09	2.13
100200814	2	1	49	2	4	2	2	2	2	102	102	96	100	67	66	73	68.6667	158.8	48.5	76.1	30.1775	5.02	9.08	5.3	1.15	1.14	1.3
100200815	2	1	52	2	4	2	2	2	2	98	102	94	98	69	69	66	68	157.6	62.5	84.5	34.0208	4.83	6.21	5.3	1.47	0.9	1.93
100200817	2	2	45	2	4	2	2	2	1	111	111	107	109.667	77	78	76	77	164.2	67.5	88.2	32.7131	5.12	4.32	5.6	1.04	1.1	2.64
100200822	2	1	52	2	4	2	2	2	1	135	129	123	129	92	84	87	87.6667	150.1	51.7	80.1	35.5526	4.44	8.94	5.7	1.93	1.35	2.95
100200824	2	2	48	2	5	2	2	2	1	128	129	130	129	78	77	77	77.3333	148.1	57.5	88.1	40.1667	6.2	11.1	6	1.3	0.86	2.02
100200825	2	1	48	2	4	1	2	2	2	154	146	150	150	91	89	87	89	152.4	73.5	106.1	45.682	5.57	13.11	6.3	1.57	1.06	2.4
100200832	2	2	48	2	4	2	2	2	2	130	128	129	129	70	72	74	72	159	51	78	30.8532	5.37	6.46	5.2	0.64	1.12	1.97
100200841	2	2	59	2	3	2	2	2	2	125	116	116	119	78	78	78	78	159.4	51.2	80.6	31.7218	5.45	8.16	6.1	0.77	0.78	2.24
100200844	2	1	56	2	3	2	2	2	2	118	120	120	119.333	63	65	65	64.3333	150	52	80	35.5556	5.95	11.23	5.7	0.64	1.07	2.37
100200845	2	1	44	2	5	2	2	2	2	136	130	134	133.333	108	109	105	107.333	152.1	58.5	84.4	36.4825	5.13	6.66	5.5	0.87	1	1.57
100200846	2	1	67	2	4	2	2	2	2	142	146	124	137.333	79	81	79	79.6667	158.1	69.5	98.1	39.2469	5.49	7.62	6	1.61	1.14	3.01
100200848	2	1	41	2	3	2	2	2	2	106	98	101	101.667	74	67	69	70	155.2	57.1	78.1	32.4241	4.64	6.44	5.4	0.61	0.9	1.46
100200854	2	2	43	2	4	2	2	2	2	117	112	114	114.333	74	74	74	74	155.2	44.9	61	25.3248	5.23	4.87	5.6	0.68	1.64	1.73
100200859	2	2	54	2	3	2	2	2	2	118	118	110	115.333	76	78	73	75.6667	148.5	58	85.1	38.5902	4.51	4.74	5.5	1.06	1.41	3.06
100200861	2	1	53	2	4				2	91	94	96	93.6667	67	69	70	68.6667	162.7	70.8	90	33.9991	5.23	5.91	5.7	1.02	1.63	2.7
100200864	2	1	59	2	2	2	2	2	1	140	124	132	132	81	73	78	77.3333	153.2	55.8	83.1	35.4065	5.32	6.82	6.2	0.91	1.29	2.79
100200867	2	2	53	2	4				2	105	107	99	103.667	79	73	69	73.6667	156.2	52.1	85	34.8383	5.25	5.61	5.6	1.68	1.44	2.71
100200868	2	2	53	2	4	2	2	2		131	122	113	122	71	66	65	67.3333	157.9	68.1	104.2	41.793	5.63	5.63	5.8	1.55	1.02	2.54
100200869	2	2	59	2	3	2	2	2	2	112	109	104	108.333	73	71	73	72.3333	153.5	56.1	75	31.8306	5.45	7.29	6	1.17	1.66	2.75
100200871	2	1	53	2	3	1	2		2	132	139	131	134	90	86	87	87.6667	160.5	59.5	83	32.2202	4.36	7.17	5	2.91	0.68	1.49
100200874	2	2	48	2	3	2	2	2	2	139	126	122	129	78	72	74	74.6667	153.1	50.5	71.2	30.3759	5.96	6.74	5.6	1.03	1.29	1.44
100200877	2	1	55	2	3				2	109	104	97	103.333	76	71	71	72.6667	155.2	48.1	76.1	31.5938	5.84	5.69	5.8	1.21	1.28	2.83
100200886	2	1	56	2	3	2	2	2	2	101	108	112	107	75	72	77	74.6667	157.7	59.1	85.1	34.2189	5.21	6.43	5.6	1.71	0.9	2.58
100200893	2	2	54	1	4	1	2	2	1	142	153	147	147.333	81	86	76	81	155.2	52.5	83.5	34.6659	11.67	18.5	9.2	2.33	0.81	2.99
100200894	2	2	49	2	4	2	2	2	2	134	139	130	134.333	83	81	83	82.3333	151	55	70	30.7004	4.69	6.33	5.7	0.92	0.95	1.18
100200899	2	2	69	2	4	2	2	1	1	124	118	112	118	66	61	61	62.6667	149.5	50.5	75.2	33.6462	6.64	17.96	6.7	1.08	1.21	3.11
100200900	2	2	50	2	4	2	2	2	2	120	111	120	117	77	81	81	79.6667	158	71.8	90.1	36.092	5.83	8.87	6.2	3.57	0.97	1.69
100200901	2	1	42	2	5	2	2	2	1	105	101	106	104	70	66	66	67.3333	167	63.5	80.5	28.8644	5.53	7.73	5.8	1.78	0.86	1.53
100200902	2	2	61	2	4	2	2	2	2	108	106	102	105.333	62	60	61	61	154.8	51.1	72.5	30.2549	5.55	6.06	5.9	0.58	1.14	2.07
100200904	2	2	60	1		2	2	2	2	145	137	127	136.333	86	80	80	82	161	73	90	34.7209	6.69	10.47	7.3	1.13	0.98	2.22
100200905	2	2	43	2	5				2	141	146	140	142.333	92	89	96	92.3333	155.8	62.9	88.1	36.2945	4.91	7.75	5.4	1.44	1.12	2.22
100200908	2	2	49	2	3	2	2	2	2	129	123	115	122.333	87	83	77	82.3333	150	63.2	86	38.2222	5.3	6.3	5.4	1.55	0.82	1.77
100200910	2	1	46	2	4	1	2	2	1	149	137	149	145	98	96	97	97	155.5	57.5	84.5	34.9459	5.49	9.2	5.6	11.07	0.68	2.06
100200911	2	2	45	2	4	2	2	2	2	126	121	113	120	89	83	88	86.6667	160	59	74.1	28.9453	4.58	6.56	5.7	0.34	1.01	1.39
100200914	2	1	62	2	4	2	2	1	1	122	118	106	115.333	85	79	81	81.6667	158.2	60.1	87.1	34.8021	5.72	7.85	6.2	1.3	1.05	3.06
100200919	2	1	60	2	2	1	2	2	1	130	139	134	134.333	94	81	83	86	150.5	56.7	75	33.1122	5.7	12.13	5.8	1.81	0.82	2.33
100200921	2	1	56	2	4	2	1	1	2	116	119	123	119.333	79	83	81	81	157	59	83	33.6728	7.2	8.59	6.6	1.64	1.1	4
100200924	2	1	57	2	3	2	2	2	2	108	109	99	105.333	75	69	72	72	161.5	55	70	26.8382	5.29	6.24	5.9	1.51	1.2	2.93
100200926	2	1	57	2	3	2	1	2	2	150	147	145	147.333	102	100	98	100	154.5	60.5	77	32.2577	5.85	11.36	6	1.3	1.36	4.03
100200927	2	2	53	2	4	2	2	2	1	112	95	104	103.667	62	66	77	68.3333	158	49	71	28.441	4.9	5.98	5.7	0.95	1.17	2.5
100200930	2	1	57	1	4	2	2	1	2	129	134	122	128.333	94	77	73	81.3333	169	72	88	30.8112	8.48	15.12	6.9	1.03	1.04	1.63
100200931	2	2	56	1	3	2	1	1	1	129	108	112	116.333	96	72	69	79	152	65	88	38.0886	7.04	14.95	6.2	1.14	1.11	2.66
100200935	2	1	56	2	3	2	1	2	2	112	112	107	110.333	56	55	52	54.3333	158	51.5	72	28.8415	5.26	6.19	5.2	0.65	0.99	2.46
100200937	2	2	50	2	4				1	128	142	120	130	82	77	81	80	166	65.5	75	27.2173	5.92	7.07	5.9	3.11	0.85	1.62
100200938	2	2	48	2	3	2	2	2	1	152	128	137	139	89	91	87	89	148	66	82	37.4361	5.79	8.48	5.5	1.4	0.9	1.86
100200941	2	1	43	2	2	2	2	2	2	121	131	117	123	88	107	86	93.6667	155	46	67	27.8876	5.11	6.2	5.5	0.86	0.98	1
100200942	2	1	42	2	2	2	2	2	2	152	150	153	151.667	112	107	105	108	150	67.5	81	36	5.5	7.92	5.4	1.24	1.16	2.62
100200944	2	1	54	2	4			1	2	142	139	124	135	78	74	75	75.6667	161	64	85	32.7919	5.54	5.32	5.5	0.84	1.07	2.79
100200949	2	2	52	2	4	2	2	2	1	121	111	121	117.667	77	68	60	68.3333	160	51	61	23.8281	5.37	7.38	5.7	1.25	1.36	2.47
100200950	2	1	72	2	2	2	2	2	2	127	139	126	130.667	81	83	83	82.3333	145	54	81	38.5256	5.03	6.43	4.8	1.91	0.9	2.02
100200953	2	1	70	2	2	1	2	2	2	160	141	131	144	84	82	84	83.3333	150	54	86	38.2222	5.65	9.48	5.3	0.87	1.25	1.57
100200956	2	1	59	2	3	2	2	2	2	124	116	108	116	69	70	61	66.6667	150	55	81	36	6.6	7.56	6	0.76	1.25	2.58
100200958	2	2	50	2	4	2	1	1	2	102	97	99	99.3333	71	68	69	69.3333	167	74	82	29.4023	5.14	6.13	5.3	7.44	1.2	2.36
100200961	2	2	52	2	4	2	2	1	1	136	121	117	124.667	84	82	89	85	160.5	63	84	32.6084	5.83	5.75	5.9	2.43	1.22	2.61
100200964	2	2	42	2	4	2	2	2	2	104	103	101	102.667	64	63	61	62.6667	156	51	69	28.3531	5.53	6.68	5.5	0.88	1.7	2.34
100200965	2	2	41	2	4	2	2	2	2	105	105	106	105.333	70	73	70	71	166	49	65	23.5883	5.07	3.53	5.6	0.66	1.42	1.64
100200972	2	1	57	2	3	2	2	2	2	105	109	100	104.667	69	72	67	69.3333	158	57	80	32.0461	5.07	6.67	6	1.75	1.18	3.52
100200973	2	1	62	2	3	2	2	2	2	100	105	117	107.333	64	70	69	67.6667	158	54	80	32.0461	11.56	22.06	9.5	2.45	1.05	1.98
100200976	2	2	47	2	4	1	2	2	2	164	157	153	158	106	115	109	110	154	61.5	83	34.9975	5.44	9.25	5.5	2.82	1.08	2.5
100200977	2	1	42	2	5	2	2	2	1	108	123	105	112	72	80	69	73.6667	160	65	78	30.4688	5.21	8.25	5.9	1.15	1.06	1.69
100200983	2	2	63	2	4	2	2		2	156	142	154	150.667	86	83	84	84.3333	160	52.5	72	28.125	5.04	6.41	5.9	0.87	1.5	2.49
100200984	2	2	42	2	4	2	2	2	1	133	120	118	123.667	84	82	83	83	173	75	92	30.7394	4.91	4.83	5.4	2.23	0.88	1.5
100200985	2	2	49	2	4	2	2	2	1	127	121	120	122.667	84	81	80	81.6667	162	58.5	80	30.4832	5.52	6.65	5.6	0.93	1.02	1.99
100200986	2	2	47	2	4	1	2	2	1	190	187	185	187.333	90	94	88	90.6667	160	53	70	27.3438	5.58	6.73	6.1	1.17	1.02	2.57
100200987	2	1	40	2	4	2	2	2	2	107	111	109	109	76	75	59	70	168	58	72	25.5102	4.54	5.87	5.7	2.07	1.99	1.43
100200988	2	1	48	2	5	2	2	2	1	105	99	96	100	66	62	61	63	150.5	54	70	30.9047	4.46	6.42	5.5	0.45	1.47	1.62
100200989	2	1	53	2	5	1		1	2	160	153	147	153.333	102	96	95	97.6667	165	78	106	38.9348	5.05	9.97	6.2	2.34	0.93	2.43
100200995	2	1	47	2	4	2	2	2	1	106	106	99	103.667	66	68	66	66.6667	162	65	77	29.34	5.21		5.8	0.84	1.08	1.44
100200996	2	2	59	1	2	2	2	2	2	139	127	112	126	66	65	61	64	155	63	83	34.5473	9.39	16.26	7.7	0.88	1.17	2.68
100200998	2	1	46	2	4	2	2	2	2	111	109	116	112	65	66	61	64	155	47	62	25.8065	4.79	6.74	5.1	0.5	1.12	1.84
100201000	2	1	60	2	4		1		2	130	126	130	128.667	80	80	80	80	154	50	74	31.2026	5.63	7.18	5.1	1.73	1.07	1.97
100201008	2	1	46	2	3	2	2	2	2	113	99	102	104.667	78	64	64	68.6667	156	50	69	28.3531	5.78	8.8	5.3	0.44	0.98	1.14
100201009	2	2	56	2	3	2	1	2	2	128	132	125	128.333	90	84	95	89.6667	154.5	58.1	125	52.3664	5.24	5.54	5.6	2.16	0.95	1.22
100201010	2	2	53	2	2	2	2	2	2	143	146	132	140.333	79	80	83	80.6667	168.5	59.5	82	28.8811	4.82	5.19	5.6	0.75	1.59	1.76
100201011	2	2	59	2	3	2	2	2	1	115	109	109	111	71	65	72	69.3333	151.2	49	75.1	32.8501	5.64	5.73	5.3	0.52	1.06	1.82
100201019	2	2	54	2	2	2	2	2	2	117	117	102	112	72	69	67	69.3333	148.2	64.5	87.5	39.8393	5.94	6.78	6.3	1.81	0.94	2.02
100201020	2	2	45	2	5	2	2	2	2	116	122	115	117.667	72	76	68	72	156	55.6	80.5	33.0786	5.04	5.67	5.5	0.95	0.95	1.68
100201023	2	2	48	2	3	2	2	2	2	106	109	103	106	69	68	73	70	150.2	61.2	71.2	31.5602	5.31	7.34	5.3	1.72	1.19	2.09
100201026	2	2	54	2	4	2	2	2	1	126	110	103	113	74	72	69	71.6667	155.2	61	99.1	41.1425	5.84	8.6	6.2	1.51	1.19	2.48
100201029	2	2	46	2	3	2	2	2	2	95	95	89	93	68	64	66	66	155.2	52.2	73	30.3068	4.91	6.48	5.8	1.17	1.31	2.53
100201030	2	2	58	2	2	1	2	2	2	107	104	112	107.667	84	80	83	82.3333	144.5	41.3	72	34.4823	5.74	6.65	6.6	1.85	1.23	4.53
100201032	2	2	73	2	4	1	2	2	2	169	159	153	160.333	93	85	85	87.6667	159.2	58.3	69	27.2247	4.96	6.04	5.8	0.91	1.82	2.53
100201033	2	2	55	2	3	2	2	2	1	128	126	113	122.333	84	81	79	81.3333	149.5	56.5	86.1	38.5231	5.85	8.63	6.4	1.14	0.87	2.36
100201034	2	2	55	2	3	2	2	2	2	124	111	111	115.333	79	76	75	76.6667	159	61.5	83	32.831	5.41	8.93	5.8	1.74	1.08	2.69
100201036	2	1	56	2	2	2	2	2	2	97	92	95	94.6667	59	60	57	58.6667	157.2	45.2	66.5	26.9102	4.81	5.86	5.7	0.6	1.46	2.34
100201037	2	1	56	2	3	2	2	2	2	106	107	106	106.333	78	77	75	76.6667	156	58.5	86.8	35.6673	6.09	7.44	5.4	1.94	0.94	1.81
100201038	2	1	55	1	4	2	2	2	1	112	116	119	115.667	72	73	69	71.3333	157.2	60.2	75.8	30.6736	7.11	11.42	6.4	1.09	0.99	2.1
100201040	2	2	40	2	3	2	2	2	2	105	116	104	108.333	83	81	81	81.6667	158	76	99	39.6571	5.13	8	5.6	1.35	0.97	1.92
100201043	2	1	65	2	3	2	2	2	2	152	153	150	151.667	94	90	90	91.3333	149.5	44	75.5	33.7804	4.76	5.22	6	1.23	0.9	2.41
100201044	2	2	55	2	3	2	2	2	2	126	112	106	114.667	81	74	74	76.3333	149.5	65.5	94.1	42.1024	5.37	4.64	5	2.43	0.85	2.26
100201045	2	1	55	2	3	2	2	2	1	116	124	120	120	77	79	79	78.3333	147.2	71	97	44.7668	6.32	7.77	6.2	0.78	0.91	2.14
100201046	2	2	52	2	3	2	2	2	2	131	130	120	127	77	83	82	80.6667	158.8	53.1	76.5	30.3361	5.69	8.74	6.2	0.92	1	2
100201047	2	2	51	2	4	2	2	2	2	136	136	117	129.667	65	86	69	73.3333	145.2	50.1	76.5	36.2851	5.28	7.89	5.8	0.8	0.88	2.16
100201049	2	1	61	1	2	2	2	2	2	153	152	159	154.667	85	81	80	82	153.5	70.5	92.5	39.2577	8.91	14.08	7.1	2.25	0.76	1.6
100201053	2	2	55	2	4	2	2	2	2	122	105	118	115	82	76	72	76.6667	150.5	60.5	81	35.7612	7.19	10.02	6.1	0.75	0.81	2.2
100201055	2	2	56	2	3	2	2	2	2	106	104	104	104.667	74	70	65	69.6667	160	53	81	31.6406	5.04	7.46	6	0.65	1.39	2.34
100201059	2	2	59	2	3	1	2	2	1	188	174	168	176.667	83	88	86	85.6667	164	64	84	31.2314	5.31	8.61	5.9	1.62	1.68	4.06
100201061	2	1	43	2	5	2	2	2	1	93	95	92	93.3333	73	69	70	70.6667	162	56	85	32.3884	6.18	5.32	6	1.87	0.98	2.86
100201062	2	2	55	2	4	2	1	2	2	96	91	91	92.6667	71	68	65	68	160	55	72	28.125	5.37	4.1	5.4	1.45	1.1	1.6
100201063	2	2	49	2	3	2	2	2	2	103	103	100	102	76	78	76	76.6667	158.5	69	92	36.6209	4.98	7.12	5.6	1.53	1.09	1.79
100201064	2	1	61	2	3	2	2	2	2	167	142	140	149.667	78	79	85	80.6667	149	65	91	40.9891	5.45	17.99	7	1.62	1.33	2.78
100201065	2	1	60	2	2	2	2	2	2	133	122	121	125.333	77	75	77	76.3333	157.5	55.5	89	35.8781	7.86	5.94	5.3	0.88	1.35	2.7
100201066	2	2	63	2	4	2	2	2	2	109	101	97	102.333	68	67	64	66.3333	150.5	46.5	77	33.9952	5.03	7.97	6	1.26	1.22	2.47
100201070	2	1	60	2	3	2	2	2	1	140	140	144	141.333	83	85	82	83.3333	163	75	101	38.0142	5.15	8.75	5.9	1.09	1.14	2.33
100201071	2	1	51	2	4	2	2	2	1	118	97	96	103.667	68	67	65	66.6667	157	59	89	36.1069	5.25	6.42	5.8	1	0.97	2
100201072	2	2	52	2	3	1	2	2	2	117	121	111	116.333	74	73	73	73.3333	153.2	47.5	71	30.2511	4.73	6.73	5.9	0.68	1.24	2.25
100201073	2	2	80	2	1	2	2	2	2	131	133	133	132.333	72	70	75	72.3333	146.5	46	92	42.866	5.71	11.77	6.1	1.36	1.3	2.17
100201074	2	1	55	2	3	2	2	2	1	94	97	90	93.6667	66	64	62	64	155	58	80	33.2986	4.77	5.2	5.5	0.86	1.35	2.06
100201080	2	2	51	2	4	2	2	2	1	136	122	117	125	102	92	91	95	160	60	89	34.7656	5.4	7.47	6.3	1.21	1.07	1.63
100201081	2	2	47	2	4	2	2	2	2	127	145	144	138.667	84	87	84	85	158	62	89	35.6513	5.15	8.02	5.8	0.99	1.41	2.31
100201083	2	1	58	2	3	2	2	2	2	132	126	125	127.667	80	82	82	81.3333	168.5	65	88	30.9944	5.28	8.46	6.3	1.7	1.32	2.48
100201089	2	1	49	2	3	2	2	2	2	121	125	123	123	77	77	73	75.6667	150	54	77	34.2222	6.68	7.51	6.6	1.14	1.3	2.56
100201091	2	1	52	2	4	2	2	2	1	130	116	117	121	72	79	74	75	155	54	84	34.9636	5.17	7.65	5.8	1.3	0.89	2.01
100201093	2	1	51	2	4	2	2	2	2	103	99	103	101.667	65	61	66	64	162	62	78	29.7211	4.93	6.96	5.9	1.23	1.02	2.01
100201095	2	2	47	2	2	2	2	2	1	134	135	133	134	89	90	85	88	156	60	88	36.1604	8.14	10.65	6.9	2.58	1	2.29
100201097	2	1	40	2	3	2	2	2	1	101	93	94	96	63	66	65	64.6667	155	54	80	33.2986	5.18	5.97	5.5	0.83	1.24	1.56
100201098	2	2	48	2	4	2	2	2	1	120	94	99	104.333	70	67	65	67.3333	151	61	80	35.0862	5.12	5.89	5.7	0.52	1.47	2.93
100201099	2	2	58	2	3	1	2	2	2	120	114	114	116	83	81	81	81.6667	152.5	55	73	31.3894	5.25	7.88	6.4	0.81	1.49	2.67
100201100	2	1	48	2	4	2	2	2	1	119	120	121	120	79	80	81	80	153	45	70	29.903	5.28	4.03	5.4	0.84	1.28	2.53
100201102	2	1	58	2	2	2	2	2	2	128	130	126	128	82	80	78	80	155	85	113	47.0343	6.07	9.95	6.1	0.95	0.74	1.96
100201104	2	2	47	2	3	2	2	2	1	97	95	102	98	60	60	62	60.6667	147	51	74	34.245	5.58	9.45	5.6	0.49	1.2	1.96
100201106	2	2	59	2	3	1	2	1	1	137	125	124	128.667	79	76	87	80.6667	151	54	77	33.7704	5.41	7.14	5.5	3.17	0.68	1.39
100201110	2	1	60	2	3				1	131	125	123	126.333	77	79	81	79	151	52	73	32.0161	4.73	8.07	5.9	1.01	1.09	1.77
100201111	2	1	57	2	2	2	2	2	2	129	110	114	117.667	84	81	79	81.3333	155	52	78	32.4662	5.12	5.94	5.7	0.49	1.53	2.36
100201112	2	2	60	2	3				2	158	154	146	152.667	80	80	80	80	158	58	73	29.2421	6.37	10.83	5.7	1.13	1.07	1.78
100201120	2	1	58	2	3	2	2	2	2	129	127	123	126.333	91	91	89	90.3333	155	52	76	31.6337	5.41	8.05	5.9	1.23	1.57	3.5
100201121	2	1	64	1	2	1	1	2	2	155	149	145	149.667	93	93	92	92.6667	152	68	92	39.8199	7.85	12.69	6.2	1.58	1.08	2.47
100201122	2	1	54	2	3	2	2	2	2	124	115	111	116.667	53	62	54	56.3333	160	58	78	30.4688	5.19	5.13	6	0.81	1.54	2.08
100201126	2	2	52	2	4	2	2	2	2	118	112	117	115.667	72	67	70	69.6667	152	54	87	37.6558	5.72	6.8	4.6	1.54	1	1.57
100201127	2	1	56	2	3	2	2	2	1	104	108	107	106.333	71	70	72	71	161	68	96	37.0356	5.11	6.1	5.4	1.3	1.54	3.68
100201128	2	2	76	2	2	1		1	2	175	164	164	167.667	75	75	78	76	151	66	97	42.542	6.74	11.11	6.5	0.51	1.81	2.14
100201129	2	2	66	2	2	1	2	2	2	189	185	188	187.333	85	90	89	88	142	45	91	45.1299	5.12	5.5	5.7	1.5	0.78	2.16
100201134	2	2	53	1	4	2	2	1	1	117	116	116	116.333	71	70	72	71	155	58	79	32.8824	14.14	25.18	10.3	1.56	1.75	2.09
100201135	2	1	54	2	4	2	2	2	2	135	129	130	131.333	77	70	70	72.3333	150.1	63	80	35.5082	5.21	7.17	5.9	1.47	0.88	1.84
100201138	2	1	57	2	3				2	137	130	120	129	89	84	79	84	160	76	107	41.7969	6.18	9.74	6.3	0.93	1.28	2.88
100201140	2	1	48	2	4	2	2	2	1	120	120	108	116	68	63	54	61.6667	163	63	80	30.1103	5.22	6.57	5.7	0.72	0.93	1.08
100201146	2	1	48	2	3	2	2	1	1	113	105	108	108.667	72	69	68	69.6667	162	76	86	32.7694	5.56	6.97	5.3	2.81	0.91	1.84
100201147	2	1	53	2	2	2	2	2	2	126	120	132	126	70	67	71	69.3333	150	48	67	29.7778	5.4	8.11	5.6	0.68	1.37	3.78
100201148	2	1	43	2	3	2	2	2	2	110	110	101	107	65	58	60	61	155	56	80	33.2986	5.27	6.1	5.5	0.86	1.12	2.12
100201152	2	2	54	2	4	2	2	2	1	133	125	120	126	84	78	83	81.6667	159	52	85	33.6221	5.25	7.77	5.3	1.26	1.24	2.06
100201155	2	1	54	2	4	2	2	2	2	137	119	112	122.667	80	73	71	74.6667	156	49	66	27.1203	5.82	6.9	6.1	0.84	1.2	1.83
100201156	2	2	61	2	4	1	2	2	1	140	135	141	138.667	85	82	82	83	156	60	82	33.6949	5.39	7.85	5.9	4.2	0.86	1.47
100201158	2	1	44	2	3	2	2	2	2	97	93	88	92.6667	64	64	63	63.6667	157	46	76	30.8329	5.06	6.45		0.88	1.33	2.04
100201160	2	1	43	2	3	2	2	2	2	99	96	93	96	67	61	64	64	151	47	81	35.5248	5.04	6.08	5.7	0.75	1.2	2.22
100201161	2	1	51	2	4	2	2	2	1	91	90	88	89.6667	59	59	56	58	166	60	78	28.306	4.93	5.01	5.5	0.43	1.5	1.75
100201162	2	2	59	2	3	2	2	2	1	115	114	114	114.333	70	67	63	66.6667	159	76	101.2	40.0301	6.04	6.81	6.1	3.5	0.79	1.48
100201170	2	2	58	2	2	2	2	2	2	121	121	114	118.667	86	80	77	81	150	54.5	76	33.7778	5.13	5.71	5.5	0.8	0.66	1.85
100201171	2	2	54	2	4	2	2	2	2	150	142	157	149.667	104	111	106	107	156.5	58	74	30.2136	5.62	5.82	6.2	1.08	1.24	2.61
100201173	2	1	57	2	3	2	2	2	2	124	122	116	120.667	73	73	72	72.6667	153	45	68	29.0487	5.65	6.88	6.4	2.31	0.91	2.98
100201178	2	1	61	2	2	1	2	2	2	182	182	161	175	79	82	82	81	155	68	79	32.8824	5.7	9.63	6	1.18	1.21	2.39
100201179	2	1	59	2	2	2	2	2	2	103	105	101	103	81	82	81	81.3333	153	65	84	35.8836	5.7	9.87	5.7	0.93	1.31	1.94
100201182	2	1	54	2	2	2	2	2	2	122	123	120	121.667	89	89	87	88.3333	147.5	73.2	92	42.2867	5.68	8.04	5.7	0.7	1.24	1.77
100201185	2	1	70	2	3	1	2	2	2	156	143	152	150.333	64	68	70	67.3333	148	47.5	77	35.1534	5.26	10.92	5.5	1.24	0.98	1.44
100201187	2	1	58	2	1	2	2	2	2	113	105	102	106.667	59	57	56	57.3333	150	51.5	72	32	5.51	6.64	5.9	0.82	1.26	2.22
100201191	2	2	59	2	2	2	2	2	2	122	112	111	115	78	73	68	73	151.5	50.5	72	31.3695	5.89	10.76	6.2	1.63	1.32	2.68
100201193	2	1	45	2	4	2	2	2	1	105	101	101	102.333	70	68	69	69	153	58.5	75	32.039	5.32	6.84	5.5	1.07	1.1	2.75
100201198	2	1	58	2	2	2	2	2	2	154	142	138	144.667	93	95	95	94.3333	153.8	64	77	32.552	6.14	14.63	6	1.73	1.36	3.72
100201203	2	1	47	2	4	2	2	2	1	113	103	102	106	74	76	73	74.3333	154.5	56.5	75	31.4199	4.96	6.5	5.8	1.32	0.92	1.57
100201207	2	1	52	2	4	2	2	1	2	104	100	98	100.667	62	64	66	64	153.2	51.5	68	28.9729	2.19	6.79	5.5	0.47	0.92	0.94
100201208	2	1	41	2	4	2	2	2	2	121	106	110	112.333	72	71	76	73	156	45.5	62	25.4767	5.05	5.74	5.8	0.49	1.07	1.68
100201211	2	1	42	2	4	2	2	2	2	106	105	104	105	68	67	59	64.6667	166	75.5	82	29.7576	5.4	7.83	5.9	1.27	0.72	1.59
100201213	2	1	44	2	2				2	107	101	103	103.667	72	72	66	70	144.5	70	92	44.0608	5.22	8.14	6.1	1.56	1.23	1.91
100201218	2	1	59	2	3	2	2	2	2	129	123	119	123.667	94	84	87	88.3333	160	70	92	35.9375	5.6	6.78	5.7	0.99	0.89	1.96
100201219	2	2	55	2	4	2	2	2	2	96	101	109	102	72	72	74	72.6667	156	71	89	36.5713	6.01	7.6	6.3	1.5	1.15	2.25
100201220	2	2	68	1	2	2	2	2	2	132	129	131	130.667	85	83	85	84.3333	153	54	85	36.3108	25.47	34.85	12.6	7.54	0.98	3.56
100201222	2	2	60	2	3	2	2	2	2	133	121	113	122.333	74	73	71	72.6667	156	48	73	29.9967	5.32	6.24	5.8	0.87	1.19	1.97
100201225	2	2	57	2	2	1	2	2	2	141	147	144	144	63	60	59	60.6667	155	48	86	35.796	4.83	7.84	6.2	0.82	1.19	2.16
100201227	2	2	47	2	2	2	2	2	2	113	114	100	109	78	74	75	75.6667	164	70	87.1	32.384	5.4	7.65	5.5	2.8	0.92	1.1
100201228	2	2	55	2	4	2	2	2	2	150	141	137	142.667	83	87	89	86.3333	157.2	58.7	79.8	32.2922	5.61	11.08	6.1	1.99	0.91	2.74
100201229	2	2	55	2	3	2	2	2	2	148	140	138	142	96	94	93	94.3333	151.2	51.5	71.3	31.1879	4.93	7.47	5.5	1.37	1.7	1.82
100201231	2	1	68	1	3	2	1	1	2	122	123	119	121.333	61	61	59	60.3333	158.9	74.2	94.1	37.2685	7.03	14.85	7.7	1.29	0.8	1.1
100201232	2	2	49	2	4	2	2	2	1	139	134	123	132	103	101	92	98.6667	162	60	80	30.4832	4.78	7.41	5.7	0.69	1.26	2.26
100201233	2	2	48	2	4	2	2	2	1	132	124	115	123.667	87	80	81	82.6667	168.5	106.8	120.2	42.3355	5.32	7.34	6	1.11	1.1	3.32
100201235	2	2	43	2	4	2	2	2	2	141	132	132	135	93	91	92	92	166	88	94	34.1124	5.12	11.57	6	1.25	0.95	2.8
100201236	2	2	76	2	3	2	2	2	2	148	156	152	152	84	92	79	85	150	54.9	81	36	5.68	8.14	6	0.76	1.29	2.3
100201237	2	2	72	1	3	2	1	2	2	136	141	131	136	78	77	75	76.6667	153	55	78	33.3205	13.04	26.88	11.7	1.18	1.15	2.11
100201240	2	2	58	2	2	2	2	2	1	119	109	107	111.667	74	65	62	67	152.2	52.2	81.6	35.2258	4.79	6.09	5.8	1.44	1.22	3.1
100201242	2	2	60	2	2	2	2	2	2	146	130	131	135.667	84	80	82	82	151	47	71	31.139	5.14	5.75	5.9	1.52	0.92	2.26
100201244	2	2	72	2	5	2	2	1	2	142	142	139	141	86	77	79	80.6667	153.8	56.2	93.1	39.3584	4.68	8.32	5.9	1.77	1.05	1.57
100201248	2	2	47	2	4	2	2	2	2	118	103	111	110.667	78	70	71	73	161	54.9	77.2	29.7828	4.98	6.61	5.8	0.76	1.13	1.86
100201249	2	2	67	2	2	2	2	2	2	104	102	104	103.333	71	64	66	67	153	44.5	67.5	28.8351	4.68	7.04	5.6	1	1.49	1.66
100201251	2	2	54	2	4	2	2	2	2	146	130	129	135	86	83	83	84	151	65	93	40.7877	5.01	9	5.8	1.17	0.85	1.46
100201252	2	2	53	2	4	2	2	2	2	133	119	127	126.333	91	89	93	91	159.5	61.2	79.5	31.2497	4.88	8.12	5.4	1.81	1.07	2.71
100201253	2	1	53	2	2	2	2	2	2	130	122	120	124	87	85	85	85.6667	154.9	56.7	88.2	36.7592	6.09	9.21	5.9	0.93	1.1	2.62
100201254	2	2	42	2	3	2	2	2	2	115	106	92	104.333	70	71	61	67.3333	149	46	69	31.0797	4.83	6.19	6.2	0.75	1.33	1.36
100201258	2	2	52	2	4		1		1	115	117	115	115.667	77	75	79	77	159.8	63.2	81.2	31.7982	4.74	5.99	5.9	1.51	1.55	2.46
100201260	2	2	55	2	2	2	2	2	1	140	129	124	131	81	74	75	76.6667	154.8	52	69.2	28.8778	5.62	8.47	6.1	1.43	1.22	3.11
100201261	2	2	53	2	4	2	2	2	2	127	122	117	122	82	84	83	83	161	58	79	30.4772	4.69	5.13	5.6	0.73	1.45	2.26
100201263	2	2	56	2	2	2	2	2	2	122	125	106	117.667	81	80	76	79	155	62.4	91.1	37.9188	5.93	8.54	5.7	1.44	1.1	2.49
100201266	2	2	48	2	5	2	2	2	1	97	103	99	99.6667	59	56	57	57.3333	160	55	70	27.3438	5.35	6.34	6	0.71	1.05	2.12
100201267	2	2	50	2	5	2	2	2	2	126	110	108	114.667	76	70	70	72	164	55	70	26.0262	5.9	6.68	5.8	1.23	1.01	2.35
100201268	2	1	48	2	4	2	2	2	2	95	97	100	97.3333	73	56	58	62.3333	165	65	70	25.7117	4.9	5.26	6	0.8	1.38	2.79
100201269	2	2	51	2	4	2	2	2	2	113	114	112	113	81	83	76	80	152.5	59.5	88	37.8393	5.59	7.66	5.7	0.8	1.32	1.94
100201270	2	2	51	2	4	2	2	2	1	109	112	112	111	71	68	71	70	160	69	89	34.7656	6.08	8.37	5.8	1.19	0.9	2.38
100201274	2	2	76	1	1	2	2	2	2	150	152	143	148.333	86	85	82	84.3333	148.1	53	86.2	39.3004	12.66	23.18	10.3	1.09	1.01	1.88
100201275	2	2	48	2	3	2	2	2	2	114	115	115	114.667	90	79	81	83.3333	161	62.1	88	33.9493	4.78	6.12	5.5	0.84	0.98	2.62
100201276	2	1	57	2	4				1	91	90	98	93	63	57	56	58.6667	158	47	64	25.6369	5.23	6.68	6.2	0.6	1.15	1.72
100201278	2	2	58	2	2	2	2	2	2	137	123	121	127	87	84	78	83	156	57	76	31.2295	6.09	11.69	6.2	0.99	1.27	3.35
100201279	2	2	50	2	1	2	2	2	2	123	120	114	119	76	77	74	75.6667	156	50	81	33.284	6.24	18.76	7.5	1.86	1	3.28
100201280	2	2	51	2	4	2	2	2	2	101	105	103	103	70	70	71	70.3333	160	55	74	28.9062	4.99	5.43	5.7	0.51	1.21	2.13
100201282	2	2	47	2	3	2	2	2	1	125	120	116	120.333	79	70	65	71.3333	164	65	72	26.7698	5.32	6.61	5.4	0.92	1.08	2.23
100201283	2	2	58	2	2	2	2	2	2	148	126	134	136	84	71	73	76	151	69	96	42.1034	5.56	8.66	6.2	2.94	0.84	1.25
100201284	2	2	48	2	3	2	2	2	1	133	131	120	128	85	80	82	82.3333	148	47	66	30.1315	4.96	6.82	5.1	0.94	1.27	1.73
100201288	2	1	46	2	3	2	2	2	1	108	104	109	107	68	66	90	74.6667	155.6	52.5	79.2	32.7119	5.52	4.58	5.7	2.07	1.14	2.26
100201289	2	1	44	2	3	2	2	1	1	114	114	105	111	78	80	75	77.6667	164.2	61	82	30.4136	5.04	5.45	5.2	0.83	1.28	2
100201292	2	2	48	2	4	2	2	2	2	109	103	105	105.667	75	71	70	72	155.4	52.2	69.6	28.8209	5.09	7.09	5.8	0.77	1.65	1.54
100201295	2	1	47	2	4	2	2	2	1	113	110	109	110.667	74	80	77	77	156.6	50.5	79	32.2139	5.2	6.4	5.9	0.82	1.16	2.28
100201302	2	2	50	2	4	2	2	2	2	105	95	96	98.6667	61	59	56	58.6667	153.7	50.8	79.2	33.5257	6.09	6.15	5.6	0.77	0.66	0.98
100201306	2	2	57	2	2	2	2	2	2	113	114	108	111.667	78	76	75	76.3333	152.5	61.2	83.5	35.9043	6.01	8.97	5.9	1.93	0.96	1.73
100201307	2	2	64	2	4	2	2	2	2	117	116	110	114.333	70	69	68	69	156.2	47.5	84	34.4284	5.59	6.65	6	0.74	0.94	1.95
100201310	2	2	60	2	3				2	114	130	120	121.333	60	66	61	62.3333	165.4	64.1	80.4	29.389	5.69	8.43	6	7.66	0.74	2.28
100201314	2	1	55	2	4	2	2	2	2	150	149	143	147.333	91	90	87	89.3333	152.8	52.4	79	33.8361	6.7	17.87	7.1	3.39	1.06	2.11
100201315	2	1	46	2	2				2	148	132	147	142.333	72	81	81	78	151	56.6	92	40.3491	4.94	9.51	6.1	1.33	1	3.04
100201317	2	1	48	2	4	2	2	2	2	111	98	105	104.667	73	70	69	70.6667	158.8	55.5	77	30.5344	5.12	4.55	2.9	1.01	1.2	1.31
100201319	2	2	58	2	2	2	2	2	2	138	128	117	127.667	77	73	68	72.6667	150	42.7	71	31.5556	5.28	6.72	5.6	1.06	1.67	3.01
100201323	2	1	40	2	3	2	2	2	2	109	94	104	102.333	75	62	66	67.6667	153.8	53.8	76.9	32.5098	5.4	4.86	5.3	1.1	1.39	3.58
100201324	2	2	48	2	4	2	2	2	2	112	110	107	109.667	85	82	82	83	157.3	60.1	85	34.3527	5.62	7.52	5.6	1.35	0.89	2.12
100201325	2	2	47	2	4	2	2	2	1	129	138	126	131	85	86	90	87	168	76.2	88	31.1791	6.66	8.05	5.8	1.32	0.95	2.04
100201327	2	2	54	2	4				2	108	110	115	111	77	78	69	74.6667	165	58.2	85.1	31.258	5.07	5.6	5.4	0.83	1.11	2.54
100201330	2	2	48	2	4	2	2	2	2	123	123	117	121	85	81	81	82.3333	157.6	57.2	76.2	30.6791	5.19	8.65	5.6	1.76	1.03	1.87
100201334	2	1	44	2	3	2	2	2	1	103	98	106	102.333	66	67	67	66.6667	150.1	54.1	72.2	32.0461	5.07	6.12	5.4	0.64	1.39	1.83
100201335	2	2	62	2	4	2	2	2	2	154	150	144	149.333	86	88	84	86	156.1	71.5	94.1	38.6175	5.58	5.87	5.8	0.93	1.16	1.92
100201336	2	1	57	2	2	2	2	2	2	120	136	122	126	69	74	71	71.3333	156.8	62.5	86.1	35.0196	4.71	8.37	5.7	1.98	0.88	1.75
100201338	2	2	48	2	5	2	1	2	2	111	117	115	114.333	82	75	80	79	155.4	62	83.2	34.4525	5.43	6.35	5.6	1.06	0.91	1.89
100201346	2	2	51	2	4	2	2	2		115	103	105	107.667	73	70	67	70	154.4	49.5	72.2	30.286	4.84	5.53	5.4	0.72	1.15	1.36
100201347	2	2	49	2	4	2	2	2	2	110	95	108	104.333	64	60	67	63.6667	161	67	86	33.1777	5.15	6.28	5	0.37	0.74	1.26
100201351	2	1	42	2	5	2	2	2	2	110	92	97	99.6667	59	59	55	57.6667	154.9	43.2	66	27.5069	5.34	6.62	5.6	0.36	1.43	1.05
100201352	2	2	41	2	5	2	2	2	1	98	98	96	97.3333	66	65	63	64.6667	166	66.2	81.2	29.4673	5	5.83	5.3	0.54	1.12	1.93
100201353	2	1	56	2	3	1	2	2	1	151	147	144	147.333	91	92	91	91.3333	156.2	64.5	101.1	41.4371	10.45	20.74	9.6	11.37	0.98	2.35
100201355	2	2	58	2	5	2	2	2	2	146	130	138	138	84	89	87	86.6667	162	67	81	30.8642	6.05	6.61	5.5	1.71	0.85	2.18
100201358	2	2	58	2	2	2	2	2	1	140	135	139	138	82	77	78	79	154	56	85	35.8408	5.56	7.23	5.8	2.77	1.56	3.86
100201369	2	2	72	2	3	2	2	2	2	157	166	167	163.333	91	87	94	90.6667	152	49	79	34.1932	6.03	7.47	5.9	1.15	1.4	2.07
100201372	2	2	55	2	4	2	1	2	1	120	111	105	112	83	78	72	77.6667	152	56	75	32.4619	6.7	7.43	6.1	6.62	1.08	2.62
100201376	2	1	54	2	2					116	114	116	115.333	78	63	68	69.6667	157.8	75.6	95	38.1513	6.29	7.39	6.2	1.57	1.17	1.78
100201378	2	2	44	1	4	2	2	2	2	155	139	138	144	86	84	83	84.3333	168	78.1	98.1	34.7577	12.04	19.04	10	4.4	0.85	1.38
100201380	2	2	56	1	3	1	2	2	2	156	148	148	150.667	82	75	72	76.3333	156.1	81.2	110	45.1426	8.34	12.17	8.6	2.22	1.19	2.59
100201382	2	2	55	2						129	120	111	120	79	74	69	74	155	71.8	89	37.0447	6.54	8.32	6.2	2.14	1.18	2.63
100201383	2	2	51	2	2	2	2	2	2	140	116	122	126	85	77	73	78.3333	151.4	69.5	94.2	41.096	7.73	16.87	7.5	4	1.1	3.41
100201389	2	1	47	2	5	2	2	1	2	154	148	145	149	100	98	95	97.6667	151	54.2	74.5	32.674	5.03	4.7	5.8	1.67	1.01	4.18
100201391	2	2	44	2	2	2	2	2	2	137	139	135	137	95	99	90	94.6667	161	71.5	87.5	33.7564	6.09	10.18	6.2	1.61	1.36	2.58
100201393	2	2	48	2	3	2	2	2	2	89	93	89	90.3333	60	63	59	60.6667	154.5	62.5	82.1	34.3943	5.41	6.97		0.95	1.14	1.93
100201394	2	2	78	2	3	2	2	2	2	138	147	148	144.333	79	75	79	77.6667	137.5	41.5	70	37.0248	19.81	39.43	16.4	0.91	1.31	2.98
100201395	2	1	53	2	3					130	131	126	129	79	72	75	75.3333	153.4	64.5	89.2	37.9065	4.94	9.89	5.5	0.81	1.02	2.22
100201396	2	2	48	2	4				2	105	110	103	106	61	64	63	62.6667	160	60.1	79	30.8594	4.99	5.53	5.4	0.81	1.15	1.97
100201405	2	2	55	2	2				2	148	137	142	142.333	84	83	84	83.6667	154.8	63.5	88	36.7232	9.87	17.79	7.8	1.33	1.14	2.11
100201406	2	1	52	2	4	2	2	2	2	116	110	108	111.333	80	75	75	76.6667	157.8	60	77.5	31.1234	6.22	6.65	6	1.62	0.83	2.14
100201409	2	1	54	2		1	2	2	2	123	125	117	121.667	71	70	72	71	156.8	74.5	90.2	36.6872	7.11	5.16	6.7	1.08	0.99	1.66
100201411	2	1	49	2	4	2	2	2	2	142	116	116	124.667	70	69	69	69.3333	146.2	42.4	70.1	32.7962	4.88	4.95	5.6	1.7	1.32	3.32
100201416	2	2	61	2	3	2	2	2	1	112	112	118	114	67	69	70	68.6667	148	46.2	79.1	36.1121	5.15	6.57	5.5	0.93	1.39	1.74
100201418	2	1	53	2	4	2	2	2	2	129	123	131	127.667	80	82	82	81.3333	162.9	67.8	85.2	32.1068	5.54	7	4.7	1.67	1.03	2.32
100201420	2	1	54	2	3	2	2	2	2	118	109	100	109	72	63	66	67	145.8	42.4	63.1	29.6834	4.73	6.95	4.9	0.73	1.37	2.87
100201423	2	1	54	2	4	2	2	2	1	118	110	113	113.667	77	80	76	77.6667	149.2	61.5	79.8	35.848	5.02	5.69	5.4	0.83	1.48	2.5
100201426	2	1	60	2	3	2	2	2	2	150	144	155	149.667	95	89	96	93.3333	156.4	72.5	101.2	41.372	4.85	8.27	5.1	1.69	1.27	2.27
100201429	2	2	53	2	4					119	128	120	122.333	74	75	73	74	164.2	68.2	92.4	34.2709	5.74	6.36	5.7	0.7	0.85	1.1
100201430	2	2	58	2	3	2	2	2	1		112	119	115.5	81	79	79	79.6667	164	75.2	99	36.8084	5.94	7.14	5.7	1.38	1.01	2.27
100201435	2	1	46	2	3	2	2	2	2	120	123	123	122	79	75	75	76.3333	158.2	58.8	78.5	31.3658	5.68	8.27	5.5	0.57	1.62	2.39
100201436	2	1	68	2	4	2	2	2	2	136	141	133	136.667	85	91	88	88	153.2	70.5	101.2	43.1184	5.83	7.62	6	2.99	0.96	1.66
100201443	2	1	59	2	2	1				145	142	140	142.333	103	101	102	102	160.2	63.2	88.2	34.3672	5.78	7.59	5.5	1.67	1.05	2.51
100201448	2	1	61	1	4	2	2	2	2	147	145	132	141.333	80	78	80	79.3333	161	57	77.2	29.7828	6.05	9.93	6.6	0.88	1.34	1.69
100201449	2	2	66	2	5	2	2	1	1	122	131	130	127.667	84	86	80	83.3333	153	57	84.2	35.9691	13.54	26.74	11.6	2.85	1.02	2.43
100201451	2	2	47	2	4	2	2	2	2	105	112	103	106.667	74	73	74	73.6667	159.5	56.8	76	29.8739	5.15	8.66	5.5	0.35	0.8	1.16
100201453	2	1	52	2	4	2	2	2	1	144	131	137	137.333	87	87	83	85.6667	162	57.6	78.4	29.8735	5.43	5.95	5.8	0.52	1.36	1.56
100201454	2	2	55	2	4	1	2	2	2	182	178	166	175.333	104	94	95	97.6667	147	51.5	81.2	37.5769	5.32	9.57	5.8	0.71	1.17	1.92
100201457	2	2	46	2	4					109	117	115	113.667	74	73	74	73.6667	154.5	60.2	82.1	34.3943	5.45	7.43	5.8	0.49	0.76	1.34
100201459	2	2	53	2	3				2	143	137	119	133	88	85	79	84	153.4	61.4	87.1	37.0141	5.58	7.28	5.6	1.07	0.76	1.72
100201462	2	1	47	2	3	1		2	1	148	154	148	150	105	103	95	101	158.2	64.9	82.9	33.1239	5.48	6.64	5.7	0.87	1.31	2.4
100201465	2	2	54	2	3				1	126	113	112	117	65	61	64	63.3333	153.6	49.4	79	33.4846	5.21	6.43	5.5	0.94	1.39	3.51
100201469	2	2	59	2	3	2	2	2	2	142	148	146	145.333	98	98	100	98.6667	155.2	58.2	82.3	34.1678	5.41	7.55	6.2	0.87	1.14	2.98
100201472	2	1	62	2	2				2	129	109	105	114.333	80	74	76	76.6667	163.8	71.5	89.1	33.2085	5.44	4.52	5.1	3.05	0.84	1.15
100201475	2	2	62	2	3				2	114	106	110	110	66	69	63	66	160	59.2	83.5	32.6172	5	4.47	6.2	0.8	1.11	1.75
100201482	2	1	60	2	3	2	2	2	1	123	129	130	127.333	84	80	81	81.6667	163.9	76.8	105	39.0869	6.03	10.51	6.2	1.36	1.31	2.57
100201484	2	2	48	2	3	2	2	2	2	103	100	97	100	63	61	62	62	157.2	60.4	87	35.2058	5.5	6.16	5.2	0.96	1.06	1.76
100201486	2	1	55	2	3	2	2	2	2	99	103	101	101	76	74	76	75.3333	154.2	51.5	74.1	31.1637	5.02	5.09	5.7	0.89	1.1	2.46
100201487	2	1	56	2	3	2	2	2	2	123	119	124	122	87	88	85	86.6667	164.2	60.2	82.3	30.5248	5.22	6.93	5.5	1.58	0.78	3.25
100201489	2	1	53	2	4	2	2	2	2	134	141	137	137.333	76	85	82	81	156	60	89	36.5713	5.24	6.35	5.5	0.69	1.77	3.21
100201493	2	1	49	2	3				1	108	101	103	104	72	72	75	73	160.3	56.8	87.1	33.8962	5.36	4.8	5.1	0.72	1.29	1.79
100201496	2	2	45	2	4				2	98	86	90	91.3333	66	65	62	64.3333	166	56.1	76.2	27.6528	5.41	5.05	5.6	2.01	1.36	1.54
100201499	2	2	61	2	3	1	2	2	2	149	158	158	155	82	88	88	86	153.2	61.2	86.9	37.0256	5.29	9.24	5.6	2.35	0.96	2.47
100201501	2	1	54	2	4	2	2	2	1	114	111	111	112	68	64	68	66.6667	162.5	66.8	90	34.0828	4.71	6.88	6	0.67	0.41	0.9
100201502	2	2	56	2	3	2	2	2	2	127	120	118	121.667	75	78	76	76.3333	151.2	61.7	94	41.1173	7.1	9.61	6.8	1.11	0.48	1.45
100201504	2	1	40	2	4	2	2	2	2	100	101	94	98.3333	74	68	66	69.3333	158.6	60.5	81.1	32.2414	5.3	6.46	5.4	0.47	0.38	0.35
100201506	2	1	57	2	3				2	110	123	108	113.667	68	70	74	70.6667	150	44	70.1	31.1556	5.17	7.56	6	1.1	1.24	2.39
100201508	2	1	43	2	5				2	121	110	110	113.667	81	76	71	76	153.6	46.2	69.2	29.3308	5.13	4.91	5.4	0.5	0.67	1.2
100201509	2	1	43	2	5	2	2	2	2	164	154	166	161.333	125	119	127	123.667	150.2	57	76.2	33.7765	5.29	8.17	5.5	0.65	0.57	0.94
100201512	2	2	73	2	2	2	2	2	2	101	103	98	100.667	59	60	62	60.3333	153.4	63.2	93.1	39.5639	6.65	12.58	7.3	2.94	0.94	3.19
100201513	2	2	54	2	4	2	1	2	2	112	104	107	107.667	76	78	78	77.3333	164.2	59.1	85.1	31.5634	5.18	7.28	5.8	2.34	0.94	2.06
100201514	2	2	54	2	4	2	2	1	1	105	98	100	101	67	67	62	65.3333	165.9	66.5	86.3	31.3558	4.85	6.12	5.3	1.33	1.12	2.95
100201515	2	2	75	2	2	1	2	2	2	179	155	174	169.333	78	74	69	73.6667	156.3	58.7	92.1	37.7	5.35	7.6	6.2	1.85	0.62	1.44
100201517	2	2	59	2	2	2	2	2	2	141	131	121	131	80	83	80	81	147.2	52.3	83.4	38.4902	6.1	9.17	4.5	2.5	0.68	1.63
100201518	2	2	70	1	2	1	1	2	2	170	151	159	160	88	76	78	80.6667	154.2	56.2	86.5	36.3787	7.46	18.73	7.2	2.16	1.08	2.13
100201521	2	1	60	2	3				2	129	133	128	130	88	79	80	82.3333	158.3	84	102.3	40.8238	5.32	8.88	6.4	2	0.7	1.52
100201525	2	2	65	1	2	2	2	2	2	133	137	130	133.333	71	66	76	71	167.3	80.5	115	41.0871	11.8	14.22	8.8	2.56	0.9	2.47
100201526	2	2	49	2	4	2	2	2	2	115	102	102	106.333	78	70	66	71.3333	160.4	50.8	74.1	28.8011	4.79	5.7	5.4	1.15	0.88	1.69
100201527	2	2	51	2	4	2	2	2	2	129	119	111	119.667	93	90	87	90	169	73	92.3	32.3168	5.44	4.84	5.2	0.89	0.67	1.07
100201528	2	2	68	2	2	2	2	2	2	170	151	159	160	88	76	78	80.6667	154.2	56.2	86.5	36.3787	4.74	6.51	5.7	1.12	0.99	1.64
100201529	2	2	58	2	2	2	2	2	2	133	138	140	137	79	76	80	78.3333	150.6	67.5	96.1	42.3715	5.91	7.21	6	0.89	0.97	1.46
100201531	2	2	46	2	3	2	2	2	2	123	110	114	115.667	65	63	62	63.3333	153	66	92	39.3011	5.55	6.7	5.9	1.45	0.68	1.02
100201532	2	2	46	2	4	2	2	2	1	110	106	94	103.333	77	76	71	74.6667	164.4	60.1	80.1	29.6366	5.51	6.29	5.9	1.17	0.94	2.56
100201533	2	1	43	2	3	2	2	2	2	115	108	104	109	75	78	67	73.3333	153.4	53.5	79	33.5719	5.68	6.06	5.8	0.59	0.73	1.11
100201535	2	2	58	2	3	2	2	2	1	147	156	151	151.333	84	95	92	90.3333	153.2	41.3	67	28.5468	5.36	7.67	5.9	1.11	0.94	2.28
100201536	2	1	49	2	4	2	2	2	2	191	180	178	183	115	110	117	114	153.6	54.2	77.2	32.7216	6.13	11.51	6.2	1.98	0.83	1.56
100201537	2	2	57	2	2	2	2	2	2	117	102	110	109.667	81	76	77	78	156	51	72	29.5858	5.45	4.59	6	1.05	0.87	1.8
100201539	2	2	60	2	4	2	2	2	2	109	109	100	106	68	68	69	68.3333	159	54.5	85.1	33.6616	4.92	5.45	6	0.64	0.78	1.82
100201540	2	2	56	2	3	2	2	2	1	99	101	97	99	67	68	66	67	152	52.7	73.1	31.6395	4.9	5.29	5.9	0.78	1.03	1.68
100201544	2	2	46	2	2	2	2	2	2	119	105	114	112.667	89	80	77	82	156.4	60.8	87.5	35.7713	5.42	9.45	5.5	1.03	0.78	1.66
100201545	2	2	52	2	3	2	2	2	2	110	104	105	106.333	62	61	57	60	155.7	51.3	68.2	28.1324	5.29	7.28	5.9	0.9	1.14	2.56
100201547	2	2	60	1	3	2	2	2	2	144	130	133	135.667	76	72	72	73.3333	141	63	100	50.2993	12.6	16.29	10.5	1.8	0.76	1.83
100201549	2	1	49	2	4					123	112	124	119.667	80	77	78	78.3333	151.8	57.9	76.5	33.1985	5.22	7.06	5.7	1.04	1.03	1.97
100201550	2	1	42	2	3	2	2	2	1	123	108	108	113	70	64	65	66.3333	158.9	60.2	82.8	32.7931	5.15	4.44	5.7	1.27	0.87	1
100201555	2	2	41	2	3	2	2	2	1	122	107	104	111	74	73	70	72.3333	156.6	57.1	78.2	31.8877	5.07	8.68	5.7	0.65	1.18	1.52
100201556	2	1	48	2	3	2	2	2	2	134	134	134	134	92	94	101	95.6667	154	58	76	32.0459	6.45	8.58	5.7	0.73	1.04	1.66
100201557	2	1	54	2	4	2	2	2	2	184	146	141	157	101	87	91	93	162.5	72.4	96.1	36.3929	5.51	7.33	6.4	0.89	0.92	1.56
100201560	2	1	55	2	2	2	2	2	2	147	145	148	146.667	92	84	94	90	151	50	71	31.139	4.76	7.27	5.7	1.8	1.08	1.88
100201561	2	1	54	2	3	1	2	2	2	175	149	150	158	109	103	95	102.333	154.7	58.4	89.1	37.2303	7.26	11.33	6.9	1.5	0.73	1.92
100201562	2	1	59	2	3	2	2	2	2	118	120	120	119.333	63	65	65	64.3333	154	50	78.6	33.1422	6.23	13.26	7.2	1.6	0.87	1.91
100201566	2	1	41	2	4	2	2	2	1	92	87	92	90.3333	64	63	62	63	161.5	58	75.2	28.8319	4.98	7.42	5.9	0.51	0.93	1.18
100201569	2	1	75	2	2	2	2	2	2	108	118	118	114.667	65	66	65	65.3333	135	33.8	71	38.9575	5.48	7.16	5.9	0.56	0.9	1.85
100201571	2	2	42	2	4	2	2	2	2	103	112	103	106	69	73	69	70.3333	170	69.4	78	26.9896	5.7	7.69	5.4	0.84	0.71	1.42
100201572	2	1	48	2	4	2	2	2	2	143	144	132	139.667	90	91	86	89	152.8	65.7	84.2	36.0633	5.35	7.69	6	0.78	0.91	1.08
100201573	2	1	40	2	2	2	2	2	2	102	101	102	101.667	70	69	72	70.3333	153	52	78	33.3205	4.3	5.43	5.8	0.58	0.65	0.81
100201574	2	1	46	2	4	2	2	2	2	108	109	108	108.333	76	75	76	75.6667	152.1	49.8	78	33.716	4.46	6.4	5.5	0.46	0.97	1.65
100201575	2	1	48	2	4	2	2	2	2	89	81	89	86.3333	64	60	66	63.3333	155	54	79	32.8824	6.4	12.12	6.2	4.31	0.67	1
100201585	2	2	56	2	2				2	120	122	116	119.333	74	70	75	73	148.5	40	57	25.8477	5.17	6.41	5.9	1.2	0.98	1.85
100201586	2	1	43	2	5	2	2	2	1	125	124	126	125	81	80	78	79.6667	153	51.5	71	30.3302	5.03	5.62	6.1	0.86	1.12	2.56
100201587	2	2	53	1	2	2	2	2	1	135	134	130	133	85	84	80	83	158	50	61	24.4352	8.54	15.03	7.3	0.84	1.09	0.97
100201590	2	1	60	2	5	2	2	2	2	110	122	132	121.333	105	95	90	96.6667	153	48	62	26.4855	5.31	5.26	6.1	0.97	1.16	2.09
100201592	2	1	60	1	2	1	2	2	2	147	146	146	146.333	94	82	80	85.3333	150	57	102.3	45.4667	7.66	13.74	7.3	1.78	0.95	2.06
100201596	2	1	58	1	3	1		1	1	103	103	103	103	75	77	77	76.3333	156.5	59	78	31.8468	13.04	23.81	15.1	3.98	0.91	1.69
100201598	2	2	59	2	3	1	2	2	2	160	161	150	157	105	100	103	102.667	153.8	51	70	29.5928	4.95	7.48	6.3	0.8	1.17	2.17
100201599	2	2	51	2	4	2	2	2	1	116	120	118	118	74	70	76	73.3333	158	58	76	30.4438	5.44	7.85	6.5	0.91	1.22	1.95
100201601	2	1	57	2	2	2	2	2	2	148	133	133	138	79	81	80	80	156	61.5	61	25.0657	5.51	6.87	6.2	0.79	1.88	2.46
100201604	2	2	42	2	4	2	2	2	2	130	138	145	137.667	105	96	93	98	155.9	58	70	28.8009	5.03	7.53	6.1	0.82	1.51	2.33
100201611	2	1	47	2	3	2	2	2	1	115	115	115	115	86	86	86	86	146.5	54.5	75.6	35.2246	5.35	9.64	5.8	7.07	1.22	3.26
100201612	2	1	58	2	3	2	2	2	2	116	116	117	116.333	76	76	76	76	152	45	64	27.7008	5.13	6.16	5.5	1.02	1.57	2.99
100201615	2	2	47	2	4	2	2	2	2	126	128	137	130.333	84	89	98	90.3333	158	49.5	63	25.2363	5.43	6	5.2	1.81	0.73	1.52
100201617	2	1	57	1	3	2	2	2	1	115	108	107	110	77	71	71	73	155	54	76	31.6337	15.79	19.75	13.4	2.41	1.07	2.8
100201618	2	1	61	2	3	1	2	1	1	125	137	142	134.667	98	93	96	95.6667	151	60.5	70	30.7004	5.07	6.66	5.8	1.47	0.75	2.62
100201621	2	2	55	2	4	2	2	1	2	118	118	120	118.667	84	84	84	84	147.5	49	75	34.4729	4.96	8.55	6.1	1.84	1.04	3.05
100201622	2	1	58	2	3	2	2	2	2	121	110	111	114	92	80	84	85.3333	153.5	42.5	66	28.0109	5.18	8.3	5.9	0.92	1.26	2.83
100201625	2	2	43	2	4				2	120	121	110	117	76	78	75	76.3333	164	54	67	24.9108	4.91	5.21	5.5	1.3	1.24	2.1
100201626	2	1	49	2	3	2	2	2	2	117	118	121	118.667	68	71	76	71.6667	166.6	69.5	88.2	31.7774	5.12	6.33	5.2	1.01	1.1	2.16
100201628	2	2	49	2	3	1			2	139	150	150	146.333	96	94	95	95	154.1	50	81.5	34.3204	4.92	6.13	5.8	0.46	1.33	1.58
100201629	2	2	54	2	3			1	2	116	112	103	110.333	68	66	63	65.6667	159.2	55.3	87.2	34.4057	5.2	9.75	6.1	1.17	1.1	2.71
100201631	2	1	70	2	2	2	2	2	2	117	121	126	121.333	76	65	76	72.3333	152.8	56.3	80.2	34.3501	5.48	7.12	5.5	1.03	1.12	2.31
100201632	2	2	66	1	2	2	2	1	2	126	115	120	120.333	66	67	65	66	153.4	69.5	94.2	40.0313	8.91	14.48	8.1	0.63	0.81	2.03
100201636	2	1	64	2	3	2	2	2	2	132	139	131	134	81	87	84	84	160	62	89	34.7656	5.88	6.89	6.5	0.75	1.38	2.89
100201637	2	1	66	2	4	2	2	2	1	116	116	117	116.333	72	72	74	72.6667	153.7	56.8	92.1	38.9863	6.04	8.53	6.7	1.97	1.33	3.17
100201640	2	1	53	1	2				2	129	121	126	125.333	72	72	71	71.6667	159.1	57.8	69.7	27.5355	7.43	14.2	6.2	1.45	1.67	3
100201641	2	1	62	2	2				2	138	121	127	128.667	83	76	78	79	159.4	57.2	86	33.8471	6	12.38	6.1	1.35	1.81	2.7
100201644	2	2	47	2	3	2	2	2	1	129	125		127	85	86		85.5	165	75.5	87	31.9559	5.86	7.44	5.9	1.32	0.98	2.97
100201645	2	2	48	2	5	2	2	2	1	99	96	100	98.3333	68	66	68	67.3333	153.4	52.1	68.1	28.9399	4.87	4.93	5.6	0.6	1.36	1.35
100201647	2	1	58	2	2	2	2	2	2	118	120	120	119.333	63	65	65	64.3333	158	60	80	32.0461	5.12	6.87	5.7	2.28	1.28	2.92
100201650	2	2	56	2	2	2	2	2	2	115	111	110	112	81	75	75	77	153.1	50	84	35.8368	5.17	6.77	5.9	0.59	1.53	1.51
100201652	2	2	41	2	1	2	2	2	2	101	106	113	106.667	76	76	77	76.3333	158.6	62.1	91	36.1772	4.72	6.55	5.8	0.96	1.09	2.12
100201654	2	1	64	2	4			2	2	151	143	147	147	84	80	79	81	154	60	87.2	36.7684	5.26	8.46	5.9	1.15	1	1.9
100201655	2	1	48	2	4	2	2	2	2	117	124	119	120	80	78	78	78.6667	170	72.3	79.8	27.6125	5.91	9.38	5.7	1.01	1.37	2.67
100201656	2	1	47	2	4	2	2	2	2	90	91	88	89.6667	65	66	65	65.3333	162	62.4	79	30.1021	4.69	5.48	5.6	0.66	1.03	2.3
100201658	2	2	48	2	5	2	2	2	2	128	127	117	124	80	84	84	82.6667	164.5	62.7	83.1	30.7093	6.1	6.08	6	0.7	1.1	2.06
100201661	2	1	65	2	2	2	2	2	2	113	117	113	114.333	80	77	74	77	151.2	63.5	91	39.805	5.16	7.39	5.9	1.51	1.13	2.41
100201663	2	1	48	2	2	2	2	2		111	113	108	110.667	77	78	72	75.6667	152.8	51.6	77.1	33.0223	5.4	7.53	5.1	0.64	1.4	2.4
100201665	2	1	43	2	3	2	2	2	2	92	100		96	63	62		62.5	157.9	57.5	71.5	28.6775	5.3	5.32	5.7	0.59	1.13	1.2
100201666	2	1	47	2	4	2	2	2	1	136	145	135	138.667	100	100	92	97.3333	153.1	50	74	31.5705	4.94	7.77	5.5	1.06	1.17	1.47
100201668	2	1	60	2	5	2	2	2	1	121	122	122	121.667	82	80	80	80.6667	150.2	50	81.2	35.9928	4.9	7.56	6.3	1.09	1.16	3.13
100201669	2	2	54	2	3	2	2	2	2	107	112		109.5	77	73		75	156.2	59.3	87.5	35.8629	5.24	8.09	5.9	1.36	1.11	2.29
100201672	2	1	43	2	4	2	2	2	2	120	113	105	112.667	74	74	72	73.3333	155.8	60.8	79.4	32.7104	5.39	8.24	5.6	0.36	1.19	1.83
100201673	2	2	54	2	3	2	2	2	2	113	108		110.5	76	67		71.5	157.6	52.5	75.1	30.2362	7.06	9.84	5.5	1.32	1.09	2.33
100201674	2	2	56	2	3	2	2	2	2	93	93	92	92.6667	60	53	57	56.6667	152.4	55.8	78.2	33.6695	5.36	5.33	5.7	1.11	1.53	2.65
100201676	2	2	49	2	1	2	2	2	2	134	130	126	130	82	78	74	78	159.6	58.2	80	31.4068	5.41	7.59	5.8	0.81	1.32	1.31
100201677	2	1	53	2	3	2	2	2	2	110	117		113.5	81	84		82.5	153.6	44.8	74.1	31.4077	5.61	8.86	5.9	0.66	1.66	1.48
100201678	2	1	43	2	2	2	2	2	2	98	100		99	71	73		72	151.3	60.5	82	35.8209	5.69	6.72	5.5	0.97	1.2	1.64
100201679	2	1	45	2	4			1	1	113	109		111	78	80		79	157.8	51.9	82	32.9306	5.52	7.89	5.3	1.36	1.32	3.1
100201680	2	1	40	2	4	2	2	2	2	106	99	107	104	72	73	73	72.6667	157.1	54.2	68.5	27.7548	4.84	11.1	5.6	0.47	1.19	1.74
100201682	2	1	41	2	2	2	2	2	2	130	128	128	128.667	70	71	70	70.3333	157	60	72	29.2101	5.22	10.17	5.6	0.62	1.21	1.53
100201685	2	1	45	2	3	2	2	2	2	123	112	107	114	88	80	77	81.6667	161.2	45.2	70.2	27.0151	5.18	6.24	5.9	0.84	1.3	2.54
100201689	2	1	44	2	5	2	2	2	2	133	121		127	70	71		70.5	154.1	56.8	78.6	33.0992	5.33	5.67	5.8	0.69	1.83	1.91
100201691	2	1	44	2	4	2	2	2	2	98	96	98	97.3333	67	69	67	67.6667	162.1	46.8	65.4	24.8892	5.15	5.91	5.6	0.42	1.19	1.62
100201695	2	1	56	2	2	2	2	2	2	106	107	103	105.333	70	70	70	70	149	57.5	84	37.8361	5.71	6.7	5.7	1.69	1.42	3.86
100201699	2	1	45	2	3	2	2	2	2	117	125	115	119	88	87	80	85	162.3	68.6	89.1	33.8252	4.96	6.81	6	1.19	1.17	2.43
100201703	2	1	51	2	5	2	2	2	1	146	146	133	141.667	93	98	95	95.3333	159	45	70	27.6888	4.88	7.27	5.7	0.34	0.8	0.72
100201705	2	1	71	2	4	2	2	2	2	130	134	129	131	78	81	81	80	152	61	89	38.5215	5.4	7.8	5.9	1.98	0.81	2.28
100201708	2	2	56	2	3	1	2	2	2	154	142	141	145.667	92	90	89	90.3333	148.8	48.2	78.4	35.4087	5.39	6.27	5.5	0.67	0.92	1.42
100201709	2	1	55	2	3	2	2	2	2	113	100	108	107	65	62	66	64.3333	151	74	74	32.4547	5.26	6.06	5	0.76	0.96	1.06
100201716	2	2	49	2	2				2	129	118	122	123	89	81	83	84.3333	158.2	62	92	36.7599	5.53	7.71	5.6	0.73	1.14	1.33
100201718	2	1	41	2	4	2	2	2	2	113	112	107	110.667	69	69	67	68.3333	156	58	79	32.4622	5.58	6.45	5.7	0.43	0.79	0.93
100201719	2	1	82	2	1	2	2	2	2	149	154	148	150.333	79	82	73	78	147	37	77	35.6333	5.32	8.1	6	0.61	0.96	1.51
100201722	2	1	44	2	3	2	2	2	2	120	121	121	120.667	70	71	70	70.3333	155	50	65	27.0552	5.1	7.71	5.8	0.75	0.99	1.65
100201724	2	1	54	2	2	2	2	2	2	93	103	85	93.6667	66	62	62	63.3333	159	52	76	30.0621	4.84	6	5.2	1.18	1.14	1.7
100201725	2	1	56	2	3	2	2	2	1	117	123	121	120.333	79	74	75	76	148	54	86	39.2622	4.86	7.07	5.8	0.64	1.04	1.89
100201727	2	2	51	2	4	2	2	2	1	139	130	138	135.667	95	93	95	94.3333	155.2	49.9	82.6	34.2923	5.43	7.5	6.3	0.73	1.26	1.89
100201731	2	2	56	2	2	2	2	2	2	144	131	126	133.667	86	81	80	82.3333	153.1	60	91.2	38.9085	5.58	8.08	5.8	1.85	0.64	1.54
100201734	2	2	54	2	3	2	2	2	2	104	99	105	102.667	69	65	59	64.3333	154.2	42.8	68.1	28.6404	5.8	7.2	6.1	0.67	1.24	2.63
100201735	2	1	67	1	4	2	2	2	1	131	132	130	131	87	74	74	78.3333	148.2	57.2	95.2	43.3452	8.8	17.06	7.6	1.63	0.87	2.06
100201737	2	1	76	1	2	2	2	2	2	149	164	165	159.333	74	79	77	76.6667	157.2	53.2	87.5	35.4081	10.16	16.69	7.6	2.06	1.01	2.43
100201738	2	1	42	2	3	2	2	2	1	113	111	108	110.667	81	80	79	80	156.5	56.2	77	31.4385	6.42	8.02	6.3	0.69	1.01	1.91
100201739	2	1	60	2	3	2	2	2	2	117	118	101	112	85	78	77	80	160	56.1	76.1	29.7266	5.46	7.69	5.9	1.18	0.91	1.87
100201741	2	1	48	2	2	2	2	2	2	117	117	112	115.333	64	71	71	68.6667	155	65	94	39.1259	6.84	10.38	6.5	1.64	0.93	1.78
100201744	2	1	42	2	4			1	2	129	127	126	127.333	89	88		88.5	156.2	67.6	95.2	39.0189	4.93	6.8	5.1	1.36	0.96	1.95
100201746	2	1	62	2	2	2	2	2	2	130	136	128	131.333	75	86	81	80.6667	151.5	45.8	83.6	36.4234	5.52	7.32	6	1.13	1.47	2.76
100201747	2	2	60	1	3				2	115	121	119	118.333	69	76	72	72.3333	152.8	57.2	86.2	36.9199	8.84	3.69	7.9	2.22	0.99	1.93
100201750	2	2	46	2	3				2	111	108	108	109	78	77	72	75.6667	162.3	66.4	78.5	29.8011	4.64	4.64	5.5	0.51	0.71	1.65
100201751	2	2	59	2	3				2	118	131	130	126.333	71	80	80	77	148.2	51.5	82.1	37.3806	5.27	7.07	5.7	0.61	0.78	1.14
100201753	2	1	61	2	4	2	2	2	1	121	123	127	123.667	68	70	69	69	156.1	49.5	75.2	30.8611	5.46	6.86	6.3	1.04	0.94	2
100201754	2	2	48	2	3				1	106	107	108	107	72	73	72	72.3333	157.2	61.5	85.2	34.4774	5.38	6.88	6	0.79	1.4	3.2
100201755	2	1	42	2	5				2	155	136	134	141.667	100	98	88	95.3333	155.4	47.6	73.8	30.5601	5.42	5.64	5.6	1.12	1.04	0.97
100201756	2	1	45	2	5	2	2	2	1	104	103	111	106	74	74	80	76	163.5	56.2	85.3	31.909	6.6	8.87	5.8	0.96	0.97	2.05
100201757	2	1	54	1	4				2	129	130	127	128.667	81	79	80	80	156.1	77.8	103.1	42.311	10.57	18.77	9.7	0.85	0.94	2.61
100201759	2	1	74	2	3	2	2	2	2	162	156	149	155.667	78	67	66	70.3333	144	37	76	36.6512	5.68	6.35	6.5	0.64	0.8	1.47
100201760	2	1	48	2	4	2	2	2	2	115	107	112	111.333	79	76	79	78	151.3	57.4	90.1	39.3593	4.49	6.76	5.5	2.15	1.07	2.24
100201761	2	1	43	2	4	2	2	2	1	121	108	107	112	82	77	72	77	163.1	59	76.4	28.7201	4.38	5.51	5.6	0.5	0.89	1.06
100201762	2	1	46	2	5	2	2	2	2	116	124		120	70	72		71	155	46	80	33.2986	5.42	5.99	5.9	0.61	1.15	3.04
100201766	2	2	57	2	3	2	2	2	1	131	141	138	136.667	86	86	87	86.3333	143	50	76	37.1656	5.22	5.63	5.8	1.23	1.16	2.11
100201767	2	1	60	2	4	2	2	2	2	154	146	156	152	82	80	95	85.6667	153.5	53	78	33.1038	6.24	8.78	5.7	2.57	0.89	2.34
100201768	2	2	54	2	3	2	2	2	2	113	110	108	110.333	82	80	76	79.3333	165.5	50	71	25.9216	6.55	9.99	5.6	0.96	1.47	1.95
100201769	2	2	51	2	4	2	2	2	2	103	102	104	103	67	66	68	67	151	43	76	33.3319	5.16	6.09	5.7	1.14	1.44	1.69
100201772	2	2	48	2	3				2	151	139	144	144.667	99	96	102	99	158	62.5	83	33.2479	4.88	7.21	5.3	1.02	1.13	1.97
100201775	2	2	51	2	4	2	2	2	1	108	106	110	108	80	80	72	77.3333	161.5	60	82	31.439	4.61	3.45	5.2	0.65	1.52	1.96
100201781	2	2	49	2	3	2	2	2	2	107	104	105	105.333	80	80	84	81.3333	154	59	85	35.8408	6.01	9.13	6.4	0.96	1.03	2.47
100201783	2	1	51	2	4	2	2	2	2	101	99	100	100	55	61	60	58.6667	147	54	76	35.1705	5.22	4.58	5.7	1.76	1.06	1.77
100201785	2	2	43	2	2	2	2	2	2	141	142	143	142	92	93	95	93.3333	161	69	90	34.7209	5.71	8.11	5.9	2.77	0.78	1.89
100201786	2	1	45	2	3	2	2	2	2	107	105	105	105.667	71	75	66	70.6667	155	48	70	29.1363	5.5	7.32	6	0.94	0.82	1.1
100201788	2	2	43	2	3	2	2	2	2	111	110	108	109.667	116	79	77	90.6667	155.5	55	71	29.3628	4.93	5.24	5.6	0.53	0.96	1.19
100201792	2	1	56	2	3	2	2	2	2	149	145	144	146	110	101	107	106	158.2	65.5	82.8	33.084	5.16	10.24	6.2	1.78	1.36	3.06
100201796	2	1	53	2	4	2	2	2	2	100	120	106	108.667	75	72	70	72.3333	151.2	54.8	78.1	34.1623	5.53	8.58	6.2	1.41	1.3	5.88
100201803	2	1	56	2	3				1	117	105	116	112.667	75	75	76	75.3333	157.9	62.8	90.1	36.1377	6.47	6.98	6.4	1.64	0.87	2.17
100201806	2	1	49	2	1				2	105	103	99	102.333	64	69	66	66.3333	157.3	57.6	86.1	34.7973	5.14	6.46	6.1	1.68	0.85	2.31
100201807	2	1	44	2	3				2	133	126	126	128.333	89	91	89	89.6667	148.3	63.4	89.6	40.7404	5	9.7	6.3	1.5	1.01	3.19
100201811	2	1	54	1	3	2	2	2	1	114	103	110	109	65	64	65	64.6667	165	66.3	93.5	34.3434	6.93	18.94	7.4	1.75	0.94	1.96
100201813	2	1	64	2	2	2	2	2	2	114	115	114	114.333	79	79	71	76.3333	151	64.8	101.2	44.384	6.79	15.5	7.4	1.73	0.78	2.34
100201814	2	1	61	2	3	2	2		2	133	132	129	131.333	88	86	86	86.6667	152.6	48.5	80.2	34.4402	5.76	6.69	5.9	1.08	1.19	2.23
100201825	2	2	57	2	4				2	113	114	107	111.333	61	66	63	63.3333	155.1	50	79.1	32.8816	5.08	7.04	6.1	1.58	1.05	2.65
100201826	2	2	54	2	3	2	2	2	2	132	127	130	129.667	95	85	83	87.6667	152.6	59.4	92.6	39.7651	5.75	9.46	6.1	1.21	1.03	2.08
100201828	2	2	58	2	3				1	112	114	113	113	75	72	70	72.3333	159.3	52.9	86	33.8896	5.24	7.09	5.8	0.95	1	1.96
100201829	2	2	50	2	3	2	2	2	2	108	105	101	104.667	81	73	70	74.6667	157	50.2	74.5	30.2243	5.41	5.91	6.2	0.84	1.36	2.27
100201830	2	2	46	2	3	2	1	2	2	136	124	135	131.667	84	77	75	78.6667	146.2	47.1	86.2	40.3285	4.98	7.69	6	1.25	1.1	2.48
100201834	2	1	40	2	1	2	2	2	2	105	102	102	103	72	74	68	71.3333	164	58.9	77.8	28.9262	4.9	6.02	5.6	0.44	1.16	1.36
100201835	2	1	50	2	3	2	2	2	1	122	114	111	115.667	77	69	72	72.6667	165.1	69.5	92.5	33.935	6.46	12.82	6.7	0.52	0.66	1.14
100201844	2	1	69	2	1	2	2	1	2	112	108	108	109.333	72	73	72	72.3333	148.3	53.1	93	42.2864	5.24	6.81	6.5	0.98	1.93	3.62
100201845	2	2	55	2	2		1		2	107	104	118	109.667	74	73	75	74	154.6	41.5	68	28.4505	4.66	5.33	6.1	0.77	1.74	2.88
100201847	2	2	56	2	3	2	2	2	2	142	143	142	142.333	73	77	77	75.6667	150.9	45.3	71	31.1803	5.1	9.12	6	1.18	1.28	3.83
100201853	2	1	49	2	4	2	2	2	2	133	123	119	125	88	87	86	87	164.2	71.1	88.1	32.6761	5.34	7.07	6.1	0.9	1.33	2.41
100201854	2	1	62	2	5	2	2	2	2	186	181	169	178.667	104	100	100	101.333	159.2	58.1	87.2	34.4057	5.25	5.98	5.9	1.25	1.46	2.34
100201856	2	2	79	1	1				2	177	169	162	169.333	80	73	74	75.6667	154.2	54.5	92.1	38.7339	8.35	16.93	8.5	0.87	1.35	2.21
100201862	2	1	43	2	5				1	92	92	93	92.3333	70	73	66	69.6667	168.2	55.2	77	27.2169	5.21	6.88	5.7	1	1.36	2.4
100201866	2	1	45	2	3				1	135	112	123	123.333	81	76	75	77.3333	152.6	47.8	75.6	32.4648	12.11	7.94	5.3	1.09	1.13	2.04
100201869	2	1	58	2	2				1	112	129	124	121.667	80	90	78	82.6667	154.4	40.2	64.6	27.098	4.76	7.31	5.9	0.98	1.65	2.28
100201871	2	1	66	1	2	1	2	2	2	159	161	158	159.333	98	100	98	98.6667	161	75	78	30.0914	7.55	13.67	7.8	1.06	0.89	1.7
100201872	2	2	47	2	3	2	2	2	2	147	140	140	142.333	94	97	84	91.6667	144.7	47.8	78.1	37.3004	4.94	8.94	5.8	0.76	0.92	1.72
100201874	2	2	58	2	3	2	2	2	2	118	127	126	123.667	81	76	76	77.6667	146.4	42.3	73.8	34.4329	5.99	6.29	6.5	2.43	1.29	3.8
100201876	2	2	54	2	3	2	2	2	2	122	109	116	115.667	81	84	81	82	157.3	61.2	90.2	36.4543	5.51	6.32	6.3	2.95	1.03	2.47
100201878	2	2	53	2	2	2	2	2	2	110	104	104	106	69	72	68	69.6667	155.6	61.5	91	37.5857	5.51	7.01	6.2	0.96	1.17	3.04
100201880	2	2	47	2	5				2	134	128	116	126	81	88	78	82.3333	164.5	60.1	77.2	28.5289	5.24	6.92	5.7	0.83	1.55	1.87
100201886	2	2	58	2	3				1	130	119	129	126	81	81	75	79	150.2	41.8	70.2	31.117	5.13	7.18	5.6	0.84	1.59	0.87
100201887	2	1	42	2	3				2	112	113	110	111.667	81	76	73	76.6667	161.2	49	71	27.323	5.03	4.54	5.7	0.82	1.1	1.98
100201892	2	2	46	2	4	2	2	2	1	98	116	107	107	73	76	69	72.6667	159.3	73.2	103.5	40.7858	5.7	7.59	6.2	0.98	1.36	3.26
100201896	2	2	42	2	2	1				152	143	147	147.333	110	105	103	106	152	61.2	80.2	34.7126	5.45	8.52	5.9	0.96	1.24	2.48
100201897	2	1	46	2	4	2	2	2	1	107	102	103	104	74	73	73	73.3333	158.4	59	85.4	34.0367	5.29	6.27	5.6	1.01	0.96	2.03
100201899	2	2	42	2	4				1	103	98	100	100.333	75	67	69	70.3333	145.3	36.2	65.2	30.8828	4.93	4.94	5.6	0.61	1.47	1.12
100201900	2	1	57	2	3	2	2	2	2	132	121	120	124.333	83	96	73	84	152.9	65.4	93.8	40.1225	6.19	10.02	6.9	1.82	0.97	2.68
100201903	2	1	44	2	3	2	2	2	2	109	108	110	109	83	78	80	80.3333	158.6	70.2	87.6	34.8255	5.22	6.23	5.5	0.72	0.67	1.37
100201904	2	2	40	2	3				2	105	102	101	102.667	66	64	62	64	155.9	56.8	84.2	34.6433	5.38	5.53	5.8	0.67	0.8	1.64
100201909	2	2	50	2	4	2	2	2	2	120	118	121	119.667	79	79	77	78.3333	161.3	85.6	116.2	44.6619	13.48	23.96	10.7	1.25	0.62	2.06
100201913	2	1	52	2	1	2	2	2	2	148	135	132	138.333	93	91	88	90.6667	166.4	66.5	94.4	34.093	5.29	8.28	5.9	1.09	1.43	1.84
100201922	2	2	48	2	4				1	112	105	117	111.333	76	74	78	76	143	53.4	83	40.5888	6.45	10.25	6.2	0.74	0.95	1.81
100201931	2	1	60	2	3				2	151	146	146	147.667	88	88	81	85.6667	142	48.2	78.2	38.782	4.99	8.48	5.6	1.36	1.39	1.95
100201933	2	1	56	2	3	2	2	2		164	143	156	154.333	99	87	89	91.6667	158	48.2	77	30.8444	4.39	5.91	5.8	0.64	1.21	1.94
100201936	2	2	53	2	3	2	2	2	1	104	105	107	105.333	76	76	76	76	165.6	62.5	84.2	30.7038	5.24	7.35	6.1	0.68	0.84	1.71
100201940	2	1	57	1	2	2	2	2	2	143	145	153	147	87	82	79	82.6667	152	45.1	73.6	31.856	13.76	25.66	9.8	1.48	1.14	2.52
100201941	2	1	44	2	4	2	2	2	2	92	90	89	90.3333	63	63	62	62.6667	156.2	53.2	77	31.5594	4.72	7.6	6.1	0.88	1.29	2.02
100201942	2	1	46	2	3	2	2	2	2	92	90	96	92.6667	63	58	62	61	160.3	53.4	68.2	26.541	4.21	6.02	6	0.61	1.36	2.09
100201946	2	1	58	2	3	1	1	2	2	150	139	135	141.333	80	83	87	83.3333	156	64.5	95.6	39.2834	6.03	8.19	6.3	1.57	1.23	3.41
100201948	2	2	51	2	3	2	2	2	1	99	96	99	98	73	69	71	71	152	50.2	83	35.9245	7.23	9.05	7	0.83	1.26	2.35
100201950	2	2	40	2	3				1	95	98	92	95	64	68	64	65.3333	158	47	69	27.6398	4.83	5.95	5.6	0.78	0.69	2.96
100201956	2	1	45	2	2				2	103	115	102	106.667	85	76	76	79	156	58.5	81	33.284	4.79	5.27	5.8	1.19	1.47	2.39
100201959	2	2	55	2	3				2	106	109	105	106.667	64	64	64	64	153	44	69.2	29.5613	5.15	5.96	5.6	0.93	1.14	1.59
100201960	2	1	55	2	4	2	2	2	2	133	139	133	135	94	93	92	93	154.6	57.4	83	34.7263	5.94	13.94	6.6	2.86	1.14	3.3
100201961	2	1	58	2	3	2	2	2	2	141	137	134	137.333	91	91	93	91.6667	151.2	49.8	80.1	35.0372	5.12	8.57	6.5	3.7	1.17	3.26
100201964	2	2	61	2	3	2	2	2	2	114	122	113	116.333	76	72	71	73	170	74.2	92.4	31.9723	5.16	9.64	6.2	3.2	0.93	2.58
100201965	2	1	58	2	2	2	2	2	2	113	122	119	118	80	80	80	80	152.9	60.8	90.1	38.5398	4.99	7.29	5.6	2.16	1.19	2.3
100201969	2	2	48	2	4	2	2	2	2	135	126	118	126.333	86	86	85	85.6667	163.4	67.2	90.2	33.7833	8.86	19.35	6	4.34	1.16	1.88
100201972	2	1	57	2	1	2	2	2	2	125	125	118	122.667	85	75	80	80	160.8	53.8	84.2	32.5642	4.46	5.08	5.6	1.7	1.25	2.69
100201981	2	1	60	2	2	2	2	2	2	186	174	177	179	109	107	100	105.333	147.8	50.9	83.5	38.2241	21.91	38.26	15	2.18	1.4	2.69
100201983	2	2	64	2	4	2	2	2	2	138	137	145	140	87	84	84	85	168.2	85.1	100.2	35.4173	6.84	8.9	6.9	1.94	1.15	2.44
100201984	2	2	59	2	2	2	2	2	2	114	115	110	113	77	72	71	73.3333	150.8	57.4	94	41.3357	6.57	14.58	6.9	2.26	1.2	3.3
100201987	2	2	47	2	1	2	2	2	2	155	152	151	152.667	113	102	106	107	152.8	59.1	85.1	36.4488	5.62	8.46	5.7	6.75	0.8	1.77
100201995	2	1	48	2	3	2	2	2	2	92	92	93	92.3333	67	67	65	66.3333	153.1	54.9	87	37.1167	6.18	5.85	5.7	1.23	1.31	2.6
100202009	2	2	42	2	5	2	2	2	2	92	98	95	95	69	78	66	71	162.2	50.2	70.4	26.7591	5.23	6.87	5.9	0.76	1.04	1.46
100202012	2	1	58	2	3	2	2	2	2	112	111	115	112.667	70	84	65	73	148.2	49.5	86.5	39.384	4.74	6.52	5.9	0.74	1.17	2.37
100202014	2	1	52	2	3	2	2	2	2	140	146	133	139.667	100	98	90	96	150.2	59.6	88.6	39.273	6	7.48	5.9	0.96	1.11	1.89
100202016	2	1	89	2	1	2	2	2	2	136	138	140	138	75	76	75	75.3333	140.7	49.2	92.1	46.5234	5.47	11.21	5.8	5.28	0.91	3.2
100202017	2	2	57	2	3	2	2	2	2	99	100	96	98.3333	70	63	62	65	164.2	68.2	95.4	35.3836	4.75	4.97	6.1	0.81	1.51	3.26
100202023	2	1	65	2	3	2	2	2	2	142	144	145	143.667	87	83	84	84.6667	152.4	49.3	77.5	33.3681	5.53	10.81	6.2	0.94	1.44	3.75
100202026	2	1	61	2	3	2	2	2	2	105	98	97	100	72	77	67	72	161.2	45.8	72.3	27.8233	5.42	5.7	5.2	0.98	1.36	2.26
100202030	2	2	46	2	3	2	2	2	2	108	101	92	100.333	69	69	59	65.6667	158.1	57.1	74.3	29.7252	5.1	5.13	5.6	0.6	1.63	1.76
100202040	2	2	66	2	3	2	2	2	2	135	133	125	131	76	76	72	74.6667	154.8	54.9	83.4	34.8036	6.05	9.01	6.6	3.37	1.37	3.62
100202041	2	1	60	2	2	2	2	2	2	105	99	102	102	69	65	67	67	154.7	70	105.1	43.9159	5.28	8.66	6.4	1.33	1.18	2.52
100202045	2	1	57	2	3	2	2	2	2	142	142	139	141	95	91	88	91.3333	159.4	76.2	106.8	42.0334	8.59	15.94	7.1	0.77	1.19	2.43
100202048	2	1	41	2	3	2	2	2	2	109	96	103	102.667	69	75	65	69.6667	160.1	62.3	84.8	33.0836	5.07	6.44	5.3	0.68	0.92	1.91
100202050	2	1	51	2	4	2	2	2	2	118	108	110	112	78	77	75	76.6667	156.2	49.5	74.5	30.5347	5.31	6.13	6.1	1.29	1.01	1.98
100202052	2	2	54	1	4	2	2	1	1	141	126	132	133	94	91	93	92.6667	164.2	79.4	97	35.977	7.02	10.35	7.5	1.75	0.88	2.8
100202056	2	1	59	2	3	2	2	2	2	134	142	138	138	78	89	72	79.6667	156.3	59.7	87.4	35.7761	5.56	9.25	6.2	2.08	1.4	3.37
100202061	2	1	52	2	5	2	2	2	2	101	111	105	105.667	73	71	74	72.6667	155.1	58.5	86.2	35.833	5.14	6.28	6.1	1.75	1.54	2.59
100202066	2	2	48	2	3	2	2	2	1	87	91	92	90	63	65	64	64	158.2	50.2	70.2	28.0494	4.87	6.21	6	0.89	1.99	2.32
100202068	2	2	67	2	3	2	2	2	2	120	117	115	117.333	76	77	76	76.3333	154.1	62.4	86.1	36.2575	5.03	5.75	6	0.81	1.52	1.41
100202074	2	2	47	2	3	2	2	2	2	100	104	104	102.667	72	72	72	72	159.1	50.4	74.6	29.4712	5.15	7.02	5.9	1.05	0.9	2.65
100202075	2	1	60	2	2	2	2	2	2	130	133	134	132.333	75	77	73	75	152	100	78	33.7604	4.92	10.73	5.8	2.33	1.33	3.79
100202082	2	1	41	2	3	2	2	2	1	102	100	96	99.3333	67	67	66	66.6667	156.3	45.8	67.2	27.5075	4.76	6.03	5.1	0.88	1.44	2.05
100202083	2	1	47	2	2	2	2	2	1	121	123	108	117.333	75	72	68	71.6667	150.8	59	81.4	35.7949	4.8	6.21	5.5	1.54	1	2.53
100202088	2	1	49	2	4	2	2	2	1	106	103	110	106.333	79	79	83	80.3333	161	52.5	68	26.2336	5.81	6.34	6	1.03	1.13	2.34
100202092	2	2	67	1	2	2	2	2	2	150	144	138	144	70	68	68	68.6667	159.1	51.5	72.5	28.6416	6.5	15.53	6.5	1.47	1.42	2.98
100202094	2	2	45	2	4	2	2	2	2	101	97	101	99.6667	67	66	66	66.3333	162.1	62.5	71.1	27.0585	5.41	6.78	5.8	0.63	1.3	1.73
100202098	2	2	58	2	2	2	2	1	1	108	96	93	99	71	69	69	69.6667	158.2	56.5	81.2	32.4446	8.41	14.34	7.3	1.56	0.88	2.13
100202100	2	2	58	2	3	2	2	2	2	101	101	94	98.6667	67	67	63	65.6667	152.3	42.1	81.1	34.964	5.15	4.45	5.8	1.41	1.05	2
100202106	2	1	41	2	2	2	2	2	2	89	92	87	89.3333	68	72	64	68	151.5	52.5	67.5	29.4089	4.73	4.9	5.7	0.79	1.05	1.59
100202113	2	2	57	2	2	2	2	2	1	111	113	110	111.333	84	77	75	78.6667	152.5	61.1	77.1	33.1524	5.48	6.59	5.9	1.35	1.09	1.98
100202114	2	1	60	2	3	2	2	2	2	117	122	116	118.333	77	75	72	74.6667	158.5	63.5	82.1	32.6802	4.86	3.74	5.4	2.05	0.99	2.72
100202117	2	2	41	2	2	2	2	2	2	105	104	103	104	80	77	76	77.6667	149.5	62.1	84.1	37.6282	5.19	9.54	5.9	0.63	0.39	1.69
100202118	2	2	57	2	3	2	2	2	2	135	124	123	127.333	81	75	76	77.3333	160.5	71.5	81.4	31.5991	6.09	11.71	5.9	1.29	1.11	1.97
100202120	2	1	44	2	3	2	2	2	2	122	144	127	131	92	89	87	89.3333	153.5	67.5	82.3	34.9288	4.93	6.88	5.8	0.96	0.89	1.55
100202121	2	1	47	2	3	2	2	2	2	122	121	111	118	82	78	81	80.3333	151.5	43.5	56.1	24.442	5.91	8.39	6.1	0.85	1.06	1.31
100202122	2	1	54	2	5	2	2	2	1	121	114	113	116	70	66	71	69	162.3	65.1	77.1	29.2696	5.1	7.71	5.6	0.87	1.17	2.25
100202124	2	1	45	2	3	2	2	2	1	106	103	93	100.667	68	69	66	67.6667	154.5	47.1	61.1	25.5967	4.67	6.13	5.7	1.2	1.81	3.35
100202125	2	1	40	2	5	2	2	2	2	98	92	93	94.3333	63	63	63	63	153.1	59.5	73.1	31.1865	5.21	9.24	5.8	0.9	1.22	2.09
100202128	2	1	41	2	3	2	2	2	1	119	122	126	122.333	94	92	83	89.6667	149.5	63.5	77.2	34.541	5.68	8.62	5.9	1.4	0.97	1.75
100202130	2	1	55	2	2	2	1	2	2	117	116	113	115.333	80	79	76	78.3333	155.2	67.5	79.2	32.8808	5.2	6.88	5	4.05	0.97	2.18
100202132	2	1	40	2	4	2	2	2	2	104	110	111	108.333	69	77	75	73.6667	156.1	57.2	72.1	29.5889	5.16	5.09	5.8	0.8	0.92	1.59
100202135	2	1	41	2	4	2	2	2	2	113	105	105	107.667	74	71	67	70.6667	160.5	53.1	71.2	27.6395	5.11	9.33	5.7	0.67	1.32	1.77
100202136	2	2	43	2	3	2	2	2	2	89	82	82	84.3333	61	64	63	62.6667	150.2	47.1	61.2	27.1276	4.93	6.25	5.1	0.42	0.9	1.84
100202139	2	1	43	2	3	2	2	2	2	108	109	105	107.333	69	66	67	67.3333	156.5	56.1	63.1	25.7633	4.79	6.88	5.4	0.73	1.19	1.32
100202143	2	1	44	2	4	2	2	2	2	120	123	117	120	85	82	83	83.3333	155.5	51.5	71.1	29.4042	6.35	8.79	6.1	1.38	1.25	2.34
100202145	2	2	43	2	3	2	2	2	1	102	96	100	99.3333	77	71	68	72	162.1	61.5	70.1	26.6779	5.85	8.05	4.7	0.4	1.21	2.01
100202148	2	1	40	2	5	2	2	2	2	100	100	92	97.3333	75	76	67	72.6667	156.5	59.5	70.1	28.6213	5.08	5.46	5.6	0.93	0.98	2.28
100202154	2	1	47	2	3				2	96	91	90	92.3333	66	67	66	66.3333	155.2	50.6	70.2	29.1443	4.8	6.54	6.3	1.04	1.58	2.34
100202156	2	1	46	2	4				2	109	101	103	104.333	74	69	72	71.6667	162.1	52.5	69.4	26.4115	5.96	6.42	5.7	0.57	1.47	2.45
100202160	2	1	57	2	2	2	2		2	148	152	140	146.667	88	89	87	88	165.6	72.4	86.7	31.6154	5.77	7.45	5.8	1.18	0.94	1.87
100202161	2	1	40	2	3	2	2	2	2	90	87	89	88.6667	67	62	61	63.3333	158.2	56.2	74.2	29.6477	5.36	5.88	5.7	0.61	1.11	2.35
100202163	2	1	52	2	4		1	2	1	119	122	107	116	76	77	71	74.6667	164	64.2	72.4	26.9185	4.86	5.52	5.8	1.03	1.26	2.58
100202166	2	2	57	2	3	2	2	2	2	126	112	117	118.333	75	71	70	72	153.4	46.2	70.2	29.8323	5.28	7.91	6.4	2.13	1.63	2.5
100202167	2	2	53	2	4				1	99	105	96	100	80	71	77	76	160.2	51.4	70.5	27.4703	5.6	5.53	6.2	1.63	1.54	1.36
100202168	2	1	48	2	4	2	2	2	1	106	100	98	101.333	74	71	67	70.6667	165	136	83	30.4867	4.55	8.48	6.8	1.11	1.17	1.86
100202172	2	2	60	2	2	2	2	2	1	122	129	133	128	86	85	85	85.3333	145.2	49.8	81	38.4195	5.16	7.04	6.2	1.97	1.31	3.41
100202174	2	1	51	2	4				2	102	107	103	104	58	57	58	57.6667	153.4	49.9	78.2	33.232	5.08		5.8	1.52	1.21	3.33
100202176	2	2	43	2	4	2	2	2	2	108	103	99	103.333	74	65	65	68	154.3	50.6	74.5	31.2914	5.06	6.33	5.8	2.15	1.43	3.45
100202177	2	1	57	2	4				2	147	158	152	152.333	90	84	92	88.6667	158.1	55.6	71.8	28.725	8.6	10.76	5.9	0.75	1.81	2.13
100202182	2	2	52	2	4	2	2	2	2	95	109	103	102.333	67	65	69	67	156.1	55.8	97.5	40.0128	4.65	5.41	5.8	1.23	1.65	2.86
100202184	2	1	40	2	5	2	2	2	2	110	108	103	107	74	72	69	71.6667	164.2	75.4	85.6	31.7488	5.11	6.92	5.3	1.18	1.08	3.09
100202189	2	1	55	2	4	2	2	2	1	147	149	128	141.333	99	94	94	95.6667	164.5	69.4	88.7	32.7787	7.6	15.28	6.8	2.64	0.92	2.33
100202190	2	2	56	2	3	2	1	2	1	111	105	108	108	74	76	73	74.3333	156.1	56.8	78.6	32.2565	6.09	8.59	5.8	1.8	0.79	1.76
100202195	2	1	61	2	3	2	2	2	2	123	114	106	114.333	72	74	69	71.6667	154.6	48.4	71.8	30.0404	5.39	6.17	6.2	0.48	1.3	2
100202197	2	1	56	1	2	1	2	2	2	151	152	139	147.333	100	98	90	96	156.2	64.5	94.2	38.609	8.3	10.96	7.8	0.9	1.7	3.26
100202201	2	1	59	2	3	2	2	2	1	122	125	116	121	71	74	70	71.6667	150.1	51.8	79.8	35.4194	5.09	7.12	6.2	3.01	1.17	3.21
100202202	2	1	46	2	3	2	2	2	2	123	116	114	117.667	74	71	71	72	159.5	54	88	34.5909	6.2	9.73	6.4	1.07	1.45	2.59
100202203	2	1	56	1	3	2	1	2	2	120	113	109	114	70	65	63	66	152	53	77	33.3276	7.47	14.99	7.8	2.55	0.88	3.06
100202205	2	1	58	2	3	2	2	1	1	127	113	118	119.333	86	78	82	82	152.1	55.9	82.1	35.4883	5.96	7.24	5.9	1.15	1.45	2.31
100202207	2	2	57	2	2	2	2	2	2	148	147	146	147	91	85	81	85.6667	155.2	62.8	81.2	33.7111	5.01	6.27	5.6	1.16	1.02	2.09
100202208	2	1	44	2	4	2	2	1	1	108	102	110	106.667	86	84	78	82.6667	165.2	75.1	89.2	32.6847	5.94	8.25	6	1.42	0.93	2.99
100202211	2	1	47	2	4	2	2	2	1	131	125	125	127	80	82	81	81	163	58	74.2	27.9273	5.27	6.68	5.8	0.6	1.18	1.82
100202212	2	1	48	2	4	2	2	2	1	128	119	119	122	83	90	90	87.6667	160	60	77.2	30.1562	5.36	6.43	6	1.74	1.37	1.82
100202215	2	2	44	2	3	2	2	2	2	115	117	112	114.667	78	77	75	76.6667	155.2	47.5	69.8	28.9782	4.61	5.23	5.6	0.69	1.53	1.71
100202217	2	1	58	2	3	2	2	2	2	123	120	110	117.667	80	70	71	73.6667	155.1	50.2	78.2	32.5075	4.97	8.03	5.8	2.52	0.93	2.13
100202218	2	1	42	2	4				2	102	103	100	101.667	81	74	73	76	153.1	49.8	74.2	31.6558	4.75	4.61	5.9	1.59	1.37	1.86
100202219	2	2	43	2	4	2	2	2	1	110	102	99	103.667	76	68	68	70.6667	166	58.1	79.2	28.7415	4.64	5.95	5.6	0.79	1.35	1.56
100202221	2	1	44	2	3	2	2	2	2	120	105	112	112.333	77	75	74	75.3333	160.1	54.8	73.5	28.6751	5.45	6.54	5.8	1.09	1.23	3.2
100202222	2	2	47	2	5					105	103	94	100.667	81	64	65	70	165.2	59.1	76.1	27.8846	4.95	4.92	5.6	0.57	1.37	1.81
100202224	2	1	59	2	2	2	2	2	2	125	112	113	116.667	60	61	64	61.6667	150	38	65	28.8889	5.21	7.07	5.9	0.64	1.44	1.52
100202225	2	1	54	2	3	2	2	2	2	95	91	99	95	70	65	67	67.3333	145	43	77	36.6231	5.68	6.01	6.4	0.93	1.14	2.28
100202226	2	2	46	2	3	2	2	2	2	144	144	139	142.333	84	91	87	87.3333	150	72	98	43.5556	6.12	10.59	5.7	3.88	0.82	1.2
100202230	2	2	54	2	3	2	2	2	2	100	100	102	100.667	67	68	69	68	158	60	80	32.0461	5.01	6.86	6.3	0.58	1.13	2.63
100202238	2	2	42	2	4	2	2	2	2	129	104	104	112.333	71	72	73	72	155	53	72	29.9688	5.28	5.65	5.8	0.62	1.41	1.7
100202241	2	1	52	2	5	2	2	2	1	118	121	120	119.667	81	85	84	83.3333	156	48	76	31.2295	5.02	6.62	5.8	1.1	1.43	4.06
100202243	2	2	40	2	4	2	2	2	2	101	100	100	100.333	71	70	80	73.6667	149	47	74	33.3318	4.86	6.73	6	0.73	1.09	2.15
100202244	2	2	57	2	3	1	1	1	1	145	143	139	142.333	90	90	88	89.3333	161	68	86	33.1777	6.49	15.45	5.8	2.04	1.01	1.9
100202247	2	1	46	2	3	2	2	2	1	102	92	96	96.6667	62	71	72	68.3333	152	54	78	33.7604	5.49	8.27	5.4	1.26	1.58	2.69
100202250	2	1	52	2	4	2	2	1	2	116	117		116.5	71	69		70	155	59	74	30.8012	5.09	7.48	6	0.74	0.72	1.2
100202253	2	2	42	2	5	2	2	2	2	104	103	103	103.333	75	66	65	68.6667	150	49	78.4	34.8444	4.68	6.42	5.7	2.51	1.12	1.59
100202254	2	1	42	2	5	2	2	2	2	113	110	110	111	70	72	74	72	152	51	76	32.8947	5.5	7.24	5.9	0.68	1.57	1.52
100202255	2	2	41	2	2	2	2	2	2	98	98		98	65	68		66.5	155	53	78	32.4662	4.9	5.28	5.7	0.85	1.03	2.15
100202267	2	1	47	2	4	2	2	2	2	123	122	120	121.667	76	74	75	75	156	54	78	32.0513	5.61	8.1	5.6	0.74	1.08	1.87
100202270	2	1	52	2	3	1	1	1	1	129	132	146	135.667	97	95	96	96	152	70	89	38.5215	5.21	6.74	6.3	2.43	1.07	2.87
100202271	2	1	59	2	4	2	1	2	1	125	124	125	124.667	75	74	76	75	154	57.5	75	31.6242	5.59	6.84	6.1	2.49	1.29	2.69
100202272	2	2	50	2	3	2	1	1	2	112	114	100	108.667	73	76	69	72.6667	160	64	91	35.5469	5.45	5.79	6.2	2.37	1	5.82
100202273	2	1	59	2		2	2	2	2	100	101	104	101.667	70	70	72	70.6667	151	54.5	84	36.8405	5.17	8.15	5.6	0.95	1.22	1.85
100202274	2	1	57	2	3	2	2	1	2	133	130	110	124.333	76	74	82	77.3333	150	59.5	87	38.6667	4.53	7.83	6	2.19	1.77	1.89
100202275	2	2	52	2	4	1	2	2	1	144	146	131	140.333	92	94	89	91.6667	169	49	65	22.7583	4.68	5.98	5.8	2.82	1.17	1.8
100202277	2	1	57	2	3	2	2	2	2	119	97	100	105.333	74	70	72	72	148.5	40.5	62	28.115	5.61	7.49	6.1	1.04	1.81	3.16
100202280	2	2	56	2	5	2	2	1	2	135	144	144	141	94	93	92	93	155	67.5	93	38.7097	5.06	6.49	5.8	1.48	0.92	2.36
100202283	2	2	43	2	3	2	2	2	2	95	96	101	97.3333	73	71	76	73.3333	157	58	76	30.8329	5.3	6.19	5.5	0.61	1.5	2.07
100202288	2	1	53	2	2	2	2	2	2	115	118	122	118.333	65	66	76	69	154	49	65	27.4077	4.72	5.71	5.9	0.89	1.48	2.16
100202294	2	2	51	2	3	2	2	2	2	118	112	112	114	84	82	78	81.3333	160	55	82	32.0312	5.09	5.34	5.7	1.36	1.63	2.7
100202297	2	1	53	2	5	1	2	2	1	136	131	121	129.333	91	89	87	89	162	64	81	30.8642	5.09	4.65	5.5	1.74	1.03	2.03
100202302	2	1	55	2	4	2	2	2	1	118	122	130	123.333	71	78	78	75.6667	150	44.5	70	31.1111	4.74	5.36	6.2	1.17	0.98	2.65
100202303	2	1	46	2	4	2	2	1	1	98	98	99	98.3333	66	66	67	66.3333	153	45.5	76	32.4661	6.38	6.03	6	0.8	1.14	1.03
100202307	2	1	60	2	4	2	2	2	2	140	142	140	140.667	88	88	86	87.3333	152	44	62	26.8352	5.19	6.91	5.8	1.39	1.2	1.9
100202309	2	1	54	2	3	2	2	2	1	117	120	129	122	79	77	77	77.6667	152	61	94	40.6856	6.19	9.55	6.2	1.49	1.11	2.72
100202313	2	2	68	2	3				1	134	138	139	137	73	74	76	74.3333	160	58	77	30.0781	5.52	6.14	5.9	0.7	0.67	1.46
100202315	2	1	42	2	5	2	2	2	2	110	110	112	110.667	78	75	78	77	167	57.5	70	25.0995	4.86	3.45	5.5	0.56	0.78	0.7
100202317	2	1	62	2	4	2	2	2	1	160	159	158	159	100	99	99	99.3333	152	57	82	35.4917	6.12	11.97	6.1	1.35	0.72	2.05
100202319	2	1	53	2	4	2	2	2	2	133	130	130	131	81	80	78	79.6667	152	51	69	29.865	5.66	9.66	6.1	1.35	0.76	1.77
100202321	2	1	55	2	4	2	2	2	2	147	139	130	138.667	87	87	77	83.6667	158	54.1	74.4	29.8029	5.08	7.35	5.6	0.97	1.05	2.03
100202324	2	1	49	1	5	2	2	2	2	98	95	98	97	68	64	67	66.3333	158	50	70	28.0404	4.83	6.37	5.5	0.79	0.76	1.58
100202325	2	1	51	2	5	2	2	2	2	109	112	104	108.333	75	74	72	73.6667	158	61	78.5	31.4453	5.66	6.69	6.3	1.16	0.81	2.22
100202326	2	2	43	2	5	2	2	2	2	124	123	112	119.667	78	70	72	73.3333	163	65	77	28.9811	4.89	4.85	5.6	0.37	0.98	1.57
100202330	2	1	46	2	4	2	2	2	1	102	103	105	103.333	73	78	79	76.6667	164	60	76	28.257	5.28	7.22	5.9	2.03	1.01	2.47
100202332	2	2	48	2	3	2	2	2	1	91	93	94	92.6667	67	62	62	63.6667	163	55	78.2	29.4328	5.8	5.83	6	0.89	0.99	1.65
100202337	2	2	45	1	2	1	1	1	1	185	184	163	177.333	89	95	89	91	155	75.5	94	39.1259	6.01	8.77	6.1	1.91	1.13	2.21
100202338	2	2	48	2	4	1	2	2	2	140	144	144	142.667	73	76	63	70.6667	158	58	80	32.0461	5.32	5.29	6.1	1.18	1.09	2.31
100202339	2	1	47	2	4	2	2	2	1	90	95	90	91.6667	60	62	61	61	150	57	66	29.3333	5.21	9.8	5.8	0.9	1.05	2.56
100202342	2	2	51	2	5	2	2	2		120	136	124	126.667	80	79	74	77.6667	164	53	74	27.5134	5.45	7.33	5.6	1.75	0.83	2.12
100202344	2	1	43	2	5	2	2	2	2	105	92	107	101.333	70	67	63	66.6667	160	55	72	28.125	5.04	5.38	5.4	0.84	1.27	1.41
100202346	2	1	50	2	5	2	2	2	1	135	125	119	126.333	57	84	79	73.3333	154	48	68	28.6726	4.63	4.43	5.4	0.56	1	1.52
100202350	2	2	60	2	3	2	2	2	2	125	120	121	122	85	88	87	86.6667	155	58	78	32.4662	5.46	4	6	0.86	0.95	2.13
100202351	2	1	56	2	3	2	2	2	1	135	130	133	132.667	85	80	79	81.3333	159	57	72	28.4799	6.61	13.27	8.1	0.99	1.03	2.28
100202353	2	2	53	2	2	2	2	2	1	105	108	111	108	76	72	75	74.3333	159	41.5	67.5	26.6999	5.16	5.18	5.9	0.66	1.14	1.59
100202354	2	2	48	2	5	2	2	2	2	101	114	114	109.667	76	71	72	73	158	57.5	75.5	30.2436	4.8	6.19	5.7	0.88	0.9	1.53
100202356	2	1	40	2	4	2	2	2	2	100			100	80			80	152	45	67	28.9993	5.03	5.79	5.2	0.9	1.23	1.54
100202358	2	1	70	2	2	2	2	2	2	132	128	126	128.667	62	59	60	60.3333	150	41.5	74	32.8889	7.41	14.35	6	0.85	1.33	2.9
100202359	2	1	70	1	2	1	2	2	2	103	104	106	104.333	80	89	80	83	148	44	87	39.7188	4.62	17.1	7.2	1.25	1.51	1.99
100202361	2	2	47	2	3		1		2	116	116	117	116.333	76	72	74	74	158	53	72	28.8415	5.41	5.33	5.3	0.62	1.21	1.74
100202362	2	2	48	2	3	2	2	2	2	98	100	102	100	71	72	73	72	157	59.5	79	32.05	5.36	6.64	5.5	0.84	1.41	2.05
100202363	2	1	65	2	4	2	2	2	2	112	104	103	106.333	81	82	76	79.6667	154	52	68	28.6726	5.16	7.43	5.6	0.75	1	1.87
100202365	2	2	59	1	2	2	2	2	2	136	140	138	138	85	84	82	83.6667	155	68.5	101	42.0395	6.99	17.15	6.7	0.97	0.96	2.4
100202366	2	1	55	2	4	1	2	2	1	157	148	144	149.667	85	82	82	83	152	63	80	34.626	5.11	7.79	5.5	10.45	0.79	1.91
100202367	2	1	55	2	3	2	1	1	2	106	105	108	106.333	74	75	76	75	164	65	86	31.975	5.32	6.48	5.6	1.31	1.34	2.65
100202370	2	1	52	2	3	2	2	2	1	124	122	113	119.667	80	80	78	79.3333	164	60	70	26.0262	5.31	5.51	5.8	0.73	1.52	1.8
100202371	2	1	51	2	4	1	2	2	2	146	145	148	146.333	107	88	89	94.6667	156	57.5	74	30.4076	5.67	9.53	5.9	1.82	1.08	2.46
100202375	2	2	53	2	3	2	2	2	2	110	109	107	108.667	74	72	71	72.3333	158	53	69	27.6398	5.62	9.68	5.9	1.2	1.21	1.38
100202376	2	2	55	2	3	2	1	2	2	116	108	109	111	74	76	70	73.3333	158	75.5	95	38.0548	5.28	8.46	6.2	6.04	0.98	2.16
100202380	2	1	50	2	5	2	2	2	2	98	99	106	101	75	76	76	75.6667	157	53	71	28.8044	4.91	5.95	5.4	1.92	0.94	1.9
100202383	2	1	40	2	4	2	2	2		108	110	110	109.333	76	78	76	76.6667	160	56	71	27.7344	4.8	5.62	5.6	0.43	1.31	1.26
100202387	2	2	40	2	4	2	2	2	2	112	110	101	107.667	56	60	65	60.3333	148	49.5	69	31.5011	5.38	6.61	5.1	1.21	0.93	2.66
100202389	2	1	48	2	4	1	2	2	2	172	173	171	172	108	109	105	107.333	167	64.5	83	29.7608	5.46	6.69	5.7	1.23	1.24	2.4
100202392	2	1	40	2	4	2	2	2	1	103	104	105	104	74	73	71	72.6667	157	61.2	77	31.2386	5.27	6.22	5.3	1.74	1.13	2.75
100202393	2	1	58	2	2	2	2	2	2	122	120	120	120.667	76	76	74	75.3333	150	53	77	34.2222	6.01	7.89	5.4	3.95	0.99	2.72
100202396	2	2	47	2	4	2	2	2	1	96	100	97	97.6667	63	64	62	63	155	47	64	26.6389	4.95	5.5	5.1	0.97	1.63	1.66
100202399	2	1	41	2	5	2	2	2	2	120	120		120	82	82		82	155	51	66	27.4714	5	6.43	5.7	1.23	1.5	3.38
100202401	2	1	58	2	4	1	2	2	1	131	129	121	127	80	77	80	79	158	58.5	73	29.2421	6.38	7.02	6.4	0.89	1.12	2.21
100202402	2	2	79	2	2	2	2	2	2	131	137	131	133	67	69	68	68	155	56.5	81	33.7149	5.75	9.08	5.3	0.9	1.51	2.45
100202406	2	1	78	1	2	2	2	2	2	158	154	153	155	81	84	86	83.6667	150	50	80.5	35.7778	8.97	17.97	10.7	1.25	0.76	1.23
100202407	2	2	56	2	3	2	2	2	1	125	128	126	126.333	70	71	70	70.3333	155	50	69	28.7201	5.15	5.7	5.9	1.19	1.61	1.73
100202411	2	2	41	2	5	2	2	2	2	88	87	88	87.6667	63	65	66	64.6667	155	58	77	32.0499	5.35	7.36	6.4	1.85	0.92	2.58
100202412	2	1	64	2	5	1	1	2	2	144	141	138	141	80	77	70	75.6667	155	70	70	29.1363	5.2	9.6	6.1	2.28	0.99	1.93
100202413	2	1	47	1	4	2	2	2	2	118	103	112	111	71	79	74	74.6667	159	78	90	35.5999	8.15	11.96	7.3	1.23	1.3	3.33
100202414	2	1	46	2	4	2	2	2	1	86	91	85	87.3333	62	61	56	59.6667	160	52	72	28.125	4.78	5.42	5.4	0.76	1.22	1.13
100202418	2	1	46	2	4	2	2	2	2	105	115	100	106.667	73	72	71	72	160	55	70	27.3438	5.65	9.54	5.9	1.06	1.12	2.47
100202422	2	1	44	2	5	2	2	2	2	106	109	100	105	71	70	66	69	160	50.8	66	25.7812	4.73	5.66	5.7	0.66	1.44	1.67
100202427	2	2	57	2	3	2	2	2	2	123	118	124	121.667	66	67	62	65	153	55.5	75.6	32.2953	5.37	6.45	6.3	1.62	1.12	3.05
100202429	2	1	47	2	4	1	2	2	2	159	157	154	156.667	100	105	94	99.6667	157	50	72	29.2101	5.95	7.31	6.3	1.62	0.79	1.69
100202430	2	1	55	2	3	2	2	2	1	126	122	115	121	85	84	81	83.3333	154	53.5	71	29.9376	5.59	6.67	6.1	2.2	1.39	2.95
100202435	2	2	52	2	4	2	2	2	1	126	137	137	133.333	93	89	89	90.3333	160	66.5	76	29.6875	6.19	8.11	6	1.15	1.17	1.41
100202440	2	1	57	2	3	2	2	2	2	130	128	128	128.667	80	76	76	77.3333	172	65	78	26.3656	5.23	8.09	6.4	2.78	1.4	2.17
100202442	2	1	47	2	3	2	2	2	2	90	100	91	93.6667	68	68	66	67.3333	155	66.5	64.2	26.7222	5.13	5.81	5.5	0.8	1.21	1.94
100202443	2	2	57	2	3	2	2	2	2	124	98	102	108	80	74	69	74.3333	168	61	70	24.8016	5.02	5.33	5.9	0.97	0.99	1.99
100202444	2	2	61	2	3	2	2	2	2	126	126	129	127	78	79	77	78	150	50	70	31.1111	5.28	8.09	5.9	0.93	1.52	2.39
100202446	2	1	44	2	5	2	1	2	2	105	96	94	98.3333	80	79	72	77	167	70	84	30.1194	5.37	5.9	5.8	3.67	1.07	2.57
100202449	2	2	42	2	3	2	2	2	1	108	88	88	94.6667	58	58	59	58.3333	160	49.5	66	25.7812	6.03	5.72	6.4	1.16	1.31	1.47
100202450	2	1	50	2	4	2	2	2	2	91	87	85	87.6667	65	65	63	64.3333	171	65	72	24.623	6.11	6.18	6.2	1.18	0.83	2.1
100202451	2	1	55	2	3	1	2	2	1	126	120	116	120.667	84	80	79	81	158	58	82.5	33.0476	7.14	6.7	6.5	1.85	1.26	2.26
100202452	2	1	53	2	4	2	2	2	1	111	118	120	116.333	75	76	77	76	158	54	66	26.4381	5.16	5.09	6.3	1.12	1.66	3.9
100202455	2	1	59	2	2	2	2	2	2	115	122	117	118	59	64	69	64	150	55	80	35.5556	5.68	9.1	6.4	1.9	0.82	1.56
100202457	2	2	60	2	3	1	2	1	2	141	130	128	133	79	72	71	74	160	52	76	29.6875	5.01	5.96	5.8	0.95	1.04	1.96
100202458	2	1	58	2	2	2	2	2	2	103	108	115	108.667	77	78	82	79	156	64	90	36.9822	5.28	6.55	6.3	1.97	1.02	2.11
100202460	2	2	48	2	4	2	2	2	1	105	108		106.5	73	71		72	161	55	70	27.0051	5.15	6.27	5.7	0.51	1.11	1.46
100202462	2	1	56	2	3	2	2	2	2	110	118	110	112.667	78	74	73	75	156	54	80	32.8731	5.91	6.38	6.2	2	1.15	3.34
100202467	2	1	51	2	3	2	2	2	1	150	150	148	149.333	94	96	98	96	158	61	78	31.245	5.31	10.66	6.6	2.32	0.82	2.12
100202468	2	2	54	2	4	2	2	2	2	153	136	139	142.667	83	78	81	80.6667	156	55.5	74	30.4076	5.48	5.79	5.8	0.81	1.35	2.37
100202469	2	2	56	2	3	2	2	2	2	104	100	113	105.667	76	72	78	75.3333	156	59	77	31.6404	5.77	11.31	6.8	3.2	1.27	3.1
100202471	2	1	54	2	4	2	2	2	2	126	124	131	127	81	80	84	81.6667	163	63	80	30.1103	5.29	8.44	6.5	3.17	1.27	2.86
100202473	2	2	49	2	4	2	2	2	1	112	118	110	113.333	78	76	74	76	155	57	76	31.6337	5.61	10.68	6.1	2.23	1.14	2.84
100202474	2	2	50	2	4	2	2	2	2	100	104	97	100.333	70	72	67	69.6667	167	63	75	26.8923	5.58	6.06	5.9	2.95	1.15	2.82
100202476	2	1	59	2	2	2	2	2	1	120	114	124	119.333	67	69	65	67	155	59	82	34.1311	4.91	7.43	6.1	1.32	1.18	2.7
100202477	2	1	48	2	4	2	1	2	1	119	124	125	122.667	84	82	87	84.3333	165	70	87	31.9559	5.68	8.99	6.1	9.08	0.92	1.8
100202478	2	2	48	2	4	2	2	2	1	118	117	111	115.333	96	80	76	84	161	62.5	74	28.5483	5.46	8.2	6.5	1.31	1.16	1.76
100202479	2	2	48	2	4	2	2	2	2	139	124	116	126.333	77	74	72	74.3333	160	57.5	73	28.5156	5.29	8.17	5.8	1.22	1.2	2.48
100202480	2	1	55	2	5	1	2	2	1	132	128	126	128.667	79	80	83	80.6667	150	48	79	35.1111	5.49	11	6.2	1.59	1.15	3.72
100202481	2	2	58	2	4	2	2	2	2	107	105	103	105	75	74	69	72.6667	158	65.5	87	34.8502	5.7	8.48	5.2	3.29	1.16	2.38
100202483	2	1	43	2	4	2	2	2	2	106	99	105	103.333	67	68	69	68	156	59	70	28.764	4.87	4.81	6.3	0.63	1.34	2.09
100202487	2	1	53	2	2	2	2	2	1	106	104	120	110	81	80	81	80.6667	153	52.5	80	34.1749	4.96	11.22	6.1	1.28	1.33	3.01
100202490	2	1	69	2	1	1	2	2	2	180	170	172	174	97	96	97	96.6667	156	48	72	29.5858	5.14	4.71	6.9	1.16	1.88	2.19
100202491	2	2	53	2	4	2	2	2	1	135	129	128	130.667	95	91	84	90	150	73	88	39.1111	5.77	8.05	6.2	5.08	1.1	2.94
100202492	2	1	54	2	2	2	2	2	2	95	96	97	96	73	76	74	74.3333	153	55	76	32.4661	4.71	6.66	5.5	0.9	1.31	2.02
100202500	2	2	41	2	3	2	2	2	2	116	117	113	115.333	82	80	81	81	152	48	74	32.0291	5.8	6.26	5.6	1.21	1.2	3.56
100202504	2	1	57	2	3	2	2	2	2	90	83	83	85.3333	59	62	62	61	153	55	70	29.903	5	5.54	5.8	1.17	1.12	2
100202507	2	1	50	2	4	1	2	2	2	137	120	126	127.667	73	78	77	76	161	62	74	28.5483	4.93	5.17	5.7	1.3	1.14	2.69
100202509	2	1	46	2	3	2	2	2	1	132	126	131	129.667	74	76	94	81.3333	150	46	65	28.8889	5.52	6.89	5.2	0.83	1.25	2.39
100202511	2	2	59	2	3	2	2	1	2	117	113	114	114.667	79	77	75	77	150	50	72	32	4.95	9.74	5.8	1.52	0.97	2.71
100202512	2	1	48	2	5	2	2	2	1	111	110	104	108.333	72	71	68	70.3333	162	60	77	29.34	4.91	6.27	6	1.49	1.38	1.95
100202513	2	2	55	2	2	2	2	2	1	157	157	152	155.333	90	93	87	90	156	77.5	106	43.5569	5.44	9.05	6.4	2.16	1.14	2.61
100202514	2	2	42	2	4	2	2	2	2	94	89	88	90.3333	62	64	62	62.6667	161	53	62	23.9188	4.99	6.12	5.9	1.78	1.4	2.77
100202517	2	2	58	2	1	2	2	2	2	153	146	136	145	99	101	96	98.6667	150	60	83	36.8889	5.52	7.17	5.6	1.26	1.08	2.37
100202518	2	2	50	2	4	2	2	1	2	112	126	124	120.667	87	77	78	80.6667	158	80	100	40.0577	5.53	7.7	6.2	2.45	0.83	1.77
100202519	2	1	50	2	4	1	2	2	1	128	129	128	128.333	82	94	82	86	158	82	94	37.6542	5.35	5.17	6	2.43	1.07	3.04
100202520	2	1	57	2	2	2	1	1	1	129	136	126	130.333	87	72	70	76.3333	154	64	88.2	37.1901	6.48	12.83	6.9	1.56	1.19	3.29
100202523	2	2	41	1	4	2	1	2	1	134	120	116	123.333	93	93	83	89.6667	155	62	85	35.3798	8.34	11.71	11.1	1.84	1.09	1.92
100202524	2	2	48	2	4	2	2	2	2	144	140	118	134	96	88	89	91	155	52	67	27.8876	5.25	6.81	5.7	3.35	0.9	1.96
100202527	2	2	52	2	5	2	2	2	1	114	120	115	116.333	57	70	67	64.6667	158	45	68	27.2392	6.16	7.67	6	1.11	1.09	1.87
100202529	2	2	52	2	3	2	2	2	2	126	116	115	119	70	67	72	69.6667	151	59.5	77.2	33.8582	5.71	6.13	5.9	1.31	1.25	2.72
100202534	2	2	50	2	4	2	2	2	2	137	134	128	133	86	86	81	84.3333	150	50	70	31.1111	5	8.3	6	2.06	1.28	3.43
100202538	2	1	52	2	4	2	2	2	2	113	108	110	110.333	72	71	72	71.6667	156	45	62	25.4767	5.32	6.71	6.2	2.11	1.54	1.77
100202539	2	2	56	2	3	1	2	2	1	149	138	141	142.667	90	88	86	88	160	62	83	32.4219	5.82	9.48	6.3	2.04	0.91	2.46
100202542	2	2	62	2	1				2	123	120	114	119	81	88	81	83.3333	160	55.5	70	27.3438	5.23	6.98	5.1	0.83	1.06	1.98
100202548	2	2	52	2	4				2	108	106	98	104	79	75	71	75	160	68	80	31.25	6	9.51	5.5	0.98	1.01	1.78
100202556	2	1	55	2	5	2	2	2	2	116	120	116	117.333	77	77	76	76.6667	166	63	72	26.1286	5.18	6.4	6	1.87	1.25	3.93
100202568	2	2	53	2	5	2	2	2	2	100	95	96	97	66		66	66	155	53	70.2	29.2196	5.27	8.52	5.9	6.69	1.01	1.74
100202574	2	2	50	2	3	2	2	2		132	129	117	126	84	73	78	78.3333	160	79	93.2	36.4062	6.75	11.06	6.4	2.28	1.29	2.14
100202577	2	2	51	2	4	2	2	2	1	114	107	109	110	82	81	75	79.3333	158	56	68	27.2392	5.7	7.06	6.4	1.61	1.2	2.58
100202579	2	1	78	1	1	2	2	2	1	108	110	96	104.667	52	51	56	53	154	49	80.2	33.8168	10.36	23.31	9	1.21	1.19	2.34
100202582	2	2	46	2	4	2	2	2	2	97	92	98	95.6667	69	61	60	63.3333	155	53	77.2	32.1332	5.63	9.11	6.2	1.37	1.08	3.19
100202584	2	2	48	2	4	2	2	2	1	106	96	96	99.3333	71	66	68	68.3333	160	50	63	24.6094	4.79	4.53	5.4	1.05	1.37	2.07
100202590	2	2	50	2	4	2	2	2	2	90	88	88	88.6667	60	60	60	60	153	50	70	29.903	5.34	5.31	5.9	3.04	1.1	1.67
100202592	2	1	58	2	3	2	2	2		150	143	139	144	75	75	73	74.3333	163	62	83	31.2394	5.97	18.06	7.4	1.73	1.64	3.45
100202599	2	2	57	2	2	2	2	2	2	125	126	121	124	87	82	79	82.6667	154	55	82.2	34.6601	6.64	6.37	6.6	3.03	1.34	3.53
100202600	2	1	40	2	2	2	2	2	2	118	110	110	112.667	70	72	69	70.3333	151	57	72.4	31.753	6.12	5.46	6	0.75	1.62	2.36
100202606	2	2	49	1	3	2	2	2	2	103	102	103	102.667	79	75	76	76.6667	158	54	76	30.4438	6.81	8.17	6.6	0.88	1.22	2.51
100202607	2	1	60	1	3	2	2	1	1	145	132	140	139	77	68	70	71.6667	164	64	83.2	30.934	7.5	15.09	7.2	2.45	1.03	1.42
100202610	2	1	58	2	3	2	2	2	2	98	87	96	93.6667	65	61	60	62	159	51	62	24.5243	5.13	7.11	6.3	0.99	1.32	2.26
100202611	2	2	49	2	4	2	2	2	1	116	115	119	116.667	83	98	78	86.3333	162	63.5	77	29.34	7.97	15.37	7.5	2.84	1.02	3.16
100202612	2	1	50	2	3	2	2	2	2	189			189	117			117	154	54	70	29.5159	5.04	10.61	5.4	1.72	1.04	2.01
100202615	2	1	60	2	3	2	2	2	2	109	107	116	110.667	75	67	61	67.6667	156	48	63	25.8876	5.26	6.75	6	1.28	1.79	2.32
100202616	2	1	60	2	4	2	2	2	2	120	132	129	127	88	79	74	80.3333	156	60	80	32.8731	5.47	10.94	6	1.42	1.64	2.61
100202617	2	1	65	2	3	2	2	2	2	151	146	153	150	103	103	106	104	157	64	88.8	36.0258	6.44	14.94	6.3	1.42	1.72	2.95
100202619	2	2	51	2	4	2	2	2	2	89	94	93	92	59	57	54	56.6667	158	54.2	67	26.8386	4.96	5.43	5.7	0.9	1.24	2.22
100202624	2	1	59	2	3	2	2	2	2	122	130	121	124.333	95	83	85	87.6667	156	55	76	31.2295	5.3	7.82	5.8	3.55	1.24	2.63
100202632	2	2	43	2	1	2	2	2	2	131	130	132	131	77	73	77	75.6667	155	62	80	33.2986	5.3	7.16	6	0.73	0.83	1.99
100202633	2	1	44	2	1	2	2	2	2	93	94	88	91.6667	59	55	53	55.6667	152	48	73	31.5963	4.97	6.62	5.9	0.72	0.86	1.29
100202635	2	1	60	2	3	2	2	2	2	101	109	105	105	64	69	68	67	160	74	82	32.0312	5.48	9.97	6.3	1.77	0.64	1.4
100202641	2	1	53	2	3	2	2	2	2	101	103	95	99.6667	75	65	66	68.6667	162	60	76	28.959	5.02	6.61	5.6	1.71	1.28	3.31
100202647	2	2	65	2	3	2	2	2	2	138	140	138	138.667	102	98	96	98.6667	163	74	96	36.1323	6.02	8.02	5.9	1.96	1.21	3.1
100202651	2	1	66	2	3	2	2	2	2	117	114	116	115.667	87	71	67	75	150	58	82	36.4444	5.66	11.13	6	2.58	1.17	3.3
100202656	2	1	60	2	3	2	2	2	2	132	130	133	131.667	77	76	76	76.3333	155	65	78	32.4662	5.95	9.3	6.2	11.4	0.75	1.98
100202665	2	2	42	2	3	2	2	2	2	115	115	120	116.667	76	75	77	76	153	45	62.2	26.571	5.79	6.96	5.6	0.7	1.09	1.78
100202668	2	2	52	2	4	2	2	2	1	90	90	94	91.3333	68	67	70	68.3333	164	52	69	25.6544	4.92	5.91	5.8	1.13	1.34	2.21
100202671	2	1	63	2	3	2	2	2	2	138	118	127	127.667	90	81	85	85.3333	155	46	70	29.1363	5.46	5.33	6	1.78	1.47	3.17
100202674	2	1	51	2	3	2	2	2	2	132	133	130	131.667	88	84	76	82.6667	158	63	90	36.0519	8.79	14.26	7.1	3.27	1.12	2.38
100202675	2	2	41	2	3	2	2	2	2	111	120	110	113.667	70	76	76	74	150	53	70	31.1111	5.05	7.77	5.3	0.74	1.12	1.91
100202677	2	2	47	2	5	2	2	2	2	141	148	148	145.667	97	100	110	102.333	162	66	80	30.4832	5.37	6.07	5.9	2.89	1.02	1.71
100202679	2	2	70	1	3	2	2	2	2	133	141	136	136.667	78	76	72	75.3333	160	46	66	25.7812	4.99	7.4	6.1	0.77	1.33	2.61
100202683	2	2	40	2		2	2	2	2	111	120	101	110.667	74	70	71	71.6667	152	56	70	30.2978	5.2	6.49	5.7	0.99	1.9	3.63
100202684	2	2	40	2	5	2	2	2	2	106	89	90	95	73	71	71	71.6667	164	70	81.2	30.1904	5.29	5.73	5.6	1.11	0.91	1.88
100202685	2	2	40	2	5				2	108	114	116	112.667	67	64	68	66.3333	165	52	62	22.7732	5.05	5.95	5.3	0.63	1.08	1.21
100202702	2	2	67	2	2	1			2	152	150	152	151.333	82	84	78	81.3333	154	52	79	33.3108	6.19	11.76	6.7	1.37	0.98	2.36
100202706	2	1	59	2	4				1	112	110	118	113.333	78	78	66	74	160	52	72	28.125	8.33	17.07	7.1	1.08	1.57	2.79
100202708	2	1	69	2	3	2	2	2	2	135	134	135	134.667	75	75	76	75.3333	159	60	80	31.6443	5.51	7.46	5.8	0.89	0.98	1.25
100202709	2	2	62	2		2	2	2	2	106	126	116	116	58	70	64	64	164	65	91	33.834	5.78	8.05	6.1	1.15	1.37	2.17
100202711	2	1	54	1	3	1	2	2	1	150	148	150	149.333	80	80	76	78.6667	161	57	80	30.863	12.19	14.33	7.4	5.81	0.55	0.8
100202715	2	1	55	2	3				1	128	128	114	123.333	78	78	72	76	154	87	66	27.8293	5.28	11.31	6.1	1.24	1.25	2.58
100202716	2	1	58	2	2	2	2	2	2	166	164	142	157.333	94	92	80	88.6667	146	60	83	38.9379	6.86	17.63	7.4	2.28	1.31	3.1
100202722	2	1	62	1	2	2	2	2	2	138	146	138	140.667	80	84		82	161	72	98	37.8072	7.01	11.86	7.1	3.69	0.92	2.01
100202725	2	1	68	2	3	2	2	2	2	142	143	130	138.333	82	78	74	78	156	65	87	35.7495	5.26	10.84	6.5	0.91	1.37	3.35
100202727	2	1	56	2	2	2	2	2	2	135	134	133	134	76	75	70	73.6667	159	68	89	35.2043	4.82	9.93	5.8	1.2	0.92	2.35
100202728	2	1	56	2	4	2	2	2	2	138	130	132	133.333	83	75	77	78.3333	156	55	75.9	31.1884	4.85	7.75	5.7	2.15	0.85	2.07
100202729	2	1	73	2	2	2	2	2	2	118	118	120	118.667	68	64	64	65.3333	144	42	83	40.027	5.67	6.75	6	0.96	1.6	3.12
100202730	2	1	84	2	1				2	150	150	152	150.667	70	70	72	70.6667	146	45	86	40.3453	5.18	8.46	5.5	1.94	1.12	3.16
100202731	2	1	60	2	1	2	2	2	2	142	146	114	134	78	74	68	73.3333	150	54	97	43.1111	5.96	7.46	4.8	0.77	1.54	1.99
100202733	2	2	54	2	2	2	2	2	2	150	130	144	141.333	80	78	80	79.3333	154	52	76	32.0459	5.37	6.78	6.2	1.35	1.09	3.19
100202734	2	1	43	2	3	2	2	2	2	94	96	90	93.3333	56	56	58	56.6667	159	55	67	26.5021	4.98	5.22	5.4	0.8	1.39	2.25
100202736	2	2	54	2	5	2	2	2	2	114	116	112	114	74	72	68	71.3333	156	59	73	29.9967	5.29	7.19	5	1.31	1.46	1.86
100202740	2	1	57	2	2				2	152	152	155	153	90	90	74	84.6667	153	65	86	36.738	4.77	6.88	6.2	0.93	1.29	2.77
100202749	2	1	61	2	3	1	2	2	2	152	138	142	144	92	96	98	95.3333	157	50	66	26.7759	5.02	7.16	5.9	1.32	1.37	2.3
100202751	2	1	54	2	3	1	2	1	2	150	144	146	146.667	88	86	79	84.3333	150	62	90	40	5.15	6.27	5.4	2.39	1.3	2.24
100202756	2	2	57	2	2	2	2	2	1	138	124	130	130.667	82	86	80	82.6667	158	85	106	42.4611	6.89	11.68	6.6	1.09	1.32	1.88
100202757	2	2	49	2	3	2	2	2	2	124	108	108	113.333	68	74	74	72	157	51	71	28.8044	5.02	6.92	5.9	1.18	1.43	4.41
100202758	2	1	40	2	3	2	2	2	2	110	99	98	102.333	74	68	68	70	154	52	79	33.3108	4.73	12.36	4.7	1.46	1.33	2.35
100202764	2	2	55	2						128	124	126	126	72	70	76	72.6667	149	56	86	38.737	5.56	11.96	6.1	0.98	1.01	2.54
100202767	2	1	58	1	2	2	2	1	2	138	130	130	132.667	74	72	70	72	155	58	94	39.1259	7.21	17.55	7.8	1	1.15	2.49
100202769	2	2	60	2	4	2	2	2		104	106	110	106.667	70	72	68	70	162	62	80	30.4832	4.91	6.64	5.8	1.15	1.26	2.09
100202771	2	1	61	2	2	2	2	2	2	124	126	126	125.333	80	74	80	78	155	45	74	30.8012	4.75	7.72	5.6	0.78	2.11	3.25
100202772	2	2	57	1	3	1	2	2	1	124	122	128	124.667	76	72	78	75.3333	152	58	77	33.3276	5.41	6.39	5.3	1.85	1.28	3.17
100202777	2	1	45	1	3	1	2	2	2	139	140	140	139.667	82	81	80	81	154	58	87	36.6841	5.77		5.8	0.9	1.42	2.57
100202782	2	1	54	2		2	2	2	2	114	110	112	112	70	70	72	70.6667	151	55	80	35.0862	5.26	6.35	6	1.96	1.88	4.02
100202784	2	2	60	2	2	2	2	2	2	128	124	120	124	74	72	70	72	154	35	58	24.4561	5.37	5.34	6.3	0.71	1.48	2.35
100202800	2	1	40	2	3	1		2	2	120	118	120	119.333	70	68	72	70	156	65	88	36.1604	5.11	7.18	4.3	1.11	1.06	1.1
100202802	2	1	45	2	4	2	2	2	2	124	120	122	122	78	70	74	74	160	48	65	25.3906	5.15	5.06	6.1	0.96	1.51	2.11
100202804	2	2	62	2	4	1	2	2	2	124	120	118	120.667	82	80	80	80.6667	148	41	74	33.7838	5.9	17.3	5.6	1.6	0.84	1.59
100202806	2	2	56	2	4	1	2	2	2	142	140	142	141.333	90	88	88	88.6667	156	64	86	35.3386	5.21	7.81	6.6	0.83	0.92	1.98
100202811	2	1	55	2	3	2	2	2	2	112	116	110	112.667	80	78	70	76	155	60	78	32.4662	5.46	5.78	5.9	1.59	0.88	2.14
100202812	2	2	74	1	3	2	1	2	2	154	156	154	154.667	80	84	80	81.3333	155	58	82	34.1311	9.67	23.78	8.5	3.91	1.23	3.2
100202814	2	2	56	2	5	2	1	2	2	120	118	120	119.333	84	80	80	81.3333	159	66	89	35.2043	6.04	9.86	6.5	0.75	0.81	2.77
100202821	2	1	54	2	2	2	2	2	2	124	120	124	122.667	80	78	76	78	147	48	75	34.7078	5.63	4.77	6.3	1.56	1.23	2.73
100202822	2	1	60	1	3	2	2	1	2	118	120	118	118.667	64	66	62	64	163	58	76	28.6048	6.46	12.42	7	3.37	1.09	3.78
100202828	2	1	57	2	1	2	2	2	2	91	92	95	92.6667	56	58	58	57.3333	150	51	83	36.8889	5.41	5.61	5.9	0.77	1.64	2.85
100202835	2	1	63	2	2	2	2	2	2	124	122	126	124	80	78	80	79.3333	141	43	70	35.2095	5.7	5.23	5.9	1.4	1.91	3.57
100202851	2	1	51	1	4	2	2	2	1	140	138	138	138.667	82	80	84	82	152	52	76	32.8947	16.3	14.1	7.3	0.94	1.73	2.23
100202863	2	1	50	2	1	2	2	2	2	110	108	106	108	70	68	70	69.3333	144	50	77	37.1335	5.27	5.54	5.4	0.8	1.21	2.48
100202866	2	1	58	2	2	2	2	2	2	160	158	160	159.333	98	92	94	94.6667	167	70	96	34.4222	7.04	14.69	7.2	1.01	1.15	1.4
100202869	2	2	53	2	4	2	2	2	2	110	112	118	113.333	80	84	82	82	165	57	77	28.2828	5.61	7.99	6.3	1.6	1.05	1.82
100202871	2	1	64	2	2	2	2	2	2	124	122	120	122	68	70	68	68.6667	155	55	81	33.7149	5.27	6.34	6	0.83	1.48	2.69
100202878	2	1	64	2	1	2	2	2	2	144	142	142	142.667	92	90	94	92	145	54	79	37.5743	5.28	5.64	6	1.21	1.37	3.77
100202879	2	1	55	2	2	2	2	2	2	138	136	140	138	84	84	90	86	148	53	86	39.2622	5.96	12.15	7	1.84	1.37	3.69
100202883	2	1	45	2	3	2	2	2	2	128	126	126	126.667	88	82	80	83.3333	155	54	79	32.8824	6.17	7.96	5.9	0.72	1.25	2.27
100202884	2	2	55	2	4				2	118	120	120	119.333	76	74	80	76.6667	152	62	86	37.223	5.55	8.52	5.8	0.55	1.2	0.64
100202887	2	1	63	2	3	2	2	2	2	144	144	144	144	86	82	84	84	152	65	97	41.9841	5.59	13.28	6.5	2	1.45	4.19
100202891	2	1	68	2	1	2	2	2	2	110	114	116	113.333	64	68	70	67.3333	152	38	65	28.1337	5.43	6.47	6.2	1.01	1.78	2.6
100202892	2	1	48	2	2	2	2	2	2	108	110	112	110	64	70	68	67.3333	157	58	78	31.6443	4.79	5.29	5.5	0.82	1.8	2.06
100202895	2	1	56	2		1	2	2	2	158	154	150	154	82	80	78	80	168	70	86	30.4705	8.33	14.05	6.2	2.9	0.93	2.07
100202896	2	1	56	2	3	2	2	2	1	102	114	108	108	70	72	76	72.6667	160	56	79	30.8594	4.82	5.68	5.6	0.9	1.39	2.87
100202898	2	2	47	2	3	1	2	1	1	140	138	138	138.667	84	82	84	83.3333	158	57	82	32.8473	5.26	9.11	5.9	1.34	1.4	1.63
100202899	2	1	62	2	3	2	2	2	2	104	106	108	106	70	72	70	70.6667	153	52	79	33.7477	5.74	7.73	5.8	1.84	1.09	3.42
100202901	2	1	41	2	3	1	1	2	2	148	146	148	147.333	92	98	96	95.3333	163	67	78	29.3575	8.58	15.58	6.6	7.88	0.77	2.54
100202909	2	1	55	2	3	2	2	2	1	98	96	100	98	62	60	72	64.6667	162	64	86	32.7694	5.69	6.74	6.2	0.57	1.34	2.05
100202914	2	2	53	2	3	2	2	2	2	162	160	162	161.333	84	82	82	82.6667	149	62	86	38.737	4.85	7.89	5.4	1.27	0.8	2.08
100202916	2	1	57	2	2	2	2	2	2	108	112	104	108	64	68	62	64.6667	156	82	101	41.5023	5.41	7.34	6.2	1.54	0.95	2.36
100202917	2	1	49	2	5				2	120	121	122	121	70	68	72	70	165	55	80	29.3848	6.16	8.09	6.5	1.14	0.9	2.41
100202923	2	2	58	2	2	2	2	2	2	110	108	112	110	68	64	70	67.3333	160	55	79	30.8594	5.11	4.85	6.2	0.6	1.46	2.07
100202929	2	2	60	2	3	2	2	2	2	128	130	134	130.667	84	80	82	82	151	55	81	35.5248	5.11	6.71	5.9	1.11	1.04	1.71
100202932	2	2	58	2	4	1	2	2	2	148	144	140	144	92	90	90	90.6667	162	87	97	36.9608	6.14	11.12	6.7	2.43	0.52	1.48
100202933	2	1	54	2	2	2	2	1	2	144	142	148	144.667	82	80	84	82	153	60	84	35.8836	6.26	9.14	6.2	0.92	0.75	1.88
100202938	2	2	49	2	3	2	2	2	2	120	122	130	124	70	72	74	72	155	50	80	33.2986	4.92	5.84	5.8	0.79	1.54	2.15
100202939	2	1	53	2	2	2	2	2	2	104	106	108	106	62	65	66	64.3333	155	48	68	28.3039	5.34	6.4	5.4	0.92	0.84	1.14
100202941	2	1	48	1	3	2	2	1	2	140	138	142	140	90	84	82	85.3333	160	69	81	31.6406	5.29	11.98	6.3	2.27	1.18	2.46
100202942	2	2	44	2	3				2	122	120	126	122.667	84	80	82	82	160	69	78	30.4688	5.19	7.44	5.8	1.01	0.76	1.3
100202945	2	1	51	1	2		1		2	118	120	110	116	70	74	78	74	150	70	88	39.1111	6.83	15.42	7	1.2	1.14	2.49
100202951	2	2	58	1	2	2	2	2	1	150	152	150	150.667	94	90	90	91.3333	151	61	90	39.472	7.27	12.75	7.8	1.05	0.63	1.55
100202953	2	1	60	2	2	2	2	2	2	160	156	150	155.333	90	88	82	86.6667	159	52	90	35.5999	5.38	7.2	6.3	1.18	0.72	1.42
100202954	2	1	65	2	3	2	2	2	2	120	118	122	120	80	74	82	78.6667	159	55.5	86	34.0176	5.01	6.57	5.8	0.68	0.77	1.66
100202956	2	1	53	2	3	2	2	2	2	120	118	124	120.667	70	72	76	72.6667	148	48	90	41.0884	4.99	7.16	5.8	1.26	1.06	2.21
100202961	2	1	59	2	3	2	2	2	2	100	112	102	104.667	68	70	70	69.3333	153	51	86	36.738	5.45	8.44	6.4	0.79	0.76	1.74
100202962	2	2	55	2	4	1	2	2	2	118	120	118	118.667	76	72	76	74.6667	161	54.5	88	33.9493	5.24	6.5	6	0.92	0.8	1.67
100202964	2	1	62	2	4	1	2	2	2	168	164	160	164	84	82	88	84.6667	150	40	76	33.7778	4.35	7.39	5.8	1.81	2.22	2.44
100202967	2	1	69	2	2	2	2	2	2	142	144	138	141.333	80	82	80	80.6667	153	55	87	37.1652	19	40.11	15.2	1.42	1.66	2.57
100202968	2	1	42	2	3	2	2	2	2	108	104	100	104	74	72	70	72	158	45	67	26.8386	5.42	6.97	5	0.45	1.04	1.05
100202970	2	1	57	2	1	2	2	2	2	152	150	148	150	90	88	84	87.3333	160	56	84	32.8125	5.19	8.99	5.6	0.67	2.29	1.88
100202973	2	1	73	2	2	1	2	1	2	154	150	152	152	92	90	94	92	149	58	76	34.2327	6.39	9.63	6.3	3.14	0.99	2.57
100202976	2	1	71	2	2	2	2	2	2	142	140	142	141.333	78	80	76	78	163	69	93	35.0032	5.65	7.33	6.2	2.22	0.86	1.78
100202981	2	2	43	2	2	2	2	2	2	104	102	104	103.333	72	70	72	71.3333	155	60	80	33.2986	4.76	6.24	5.2	1.03	1.15	1.46
100202982	2	1	74	2	1	2	2	2	2	172	168	164	168	94	92	90	92	154	51	80	33.7325	5.4	8.32	6.2	2.25	0.87	2
100202983	2	1	47	2	3	2	2	2	2	108	104	108	106.667	70	72	68	70	160	60	70	27.3438	5.27	7.2	5.5	0.54	1.35	1.78
100202984	2	1	46	2	3	2	2	2	2	118	120	114	117.333	72	80	70	74	160	43	67	26.1719	4.94	5.07	5.9	1.12	1.11	1.38
100202992	2	1	55	2	4	2	2	2	2	138	130	132	133.333	88	78	72	79.3333	152	52	78	33.7604	5.28	8.59	5.8	3.41	0.94	2.15
100202995	2	1	55	2	1	2	2	2	2	124	120	118	120.667	78	74	72	74.6667	155	57	78	32.4662	4.66	6.74	5.5	1.42	1.11	2.54
100202999	2	1	67	1	1	2	2	2	2	88	88	88	88	54	54	54	54	155	52	78	32.4662	7.92	17.32	8	5.12	0.86	3.52
100203001	2	2	58	2	2	2	2	2	2	118	120	118	118.667	74	70	72	72	154	57	79	33.3108	4.98	7.06	6.1	0.83	0.96	1.9
100203002	2	2	75	2	3				2	124	122	120	122	78	76	74	76	148	50.5	84	38.3492	5.55	12.41	6	1.15	0.85	2.13
100203005	2	1	67	2	2	2	2	2	2	138	132	136	135.333	84	80	82	82	152	62	73	31.5963	6.49	11.06	5.7	1.39	1.14	1.76
100203007	2	1	57	2	3					110	108	112	110	70	60	72	67.3333	155	65	80	33.2986	5.24	5.86	5.9	0.96	0.93	1.99
100203008	2	1	59	2	2	2	2	2	2	142	140	138	140	86	84	80	83.3333	153	47	66	28.1943	5.39	5.02	6.1	0.39	0.96	0.89
100203011	2	1	52	2	2	2	2	2	1	102	100	104	102	68	66	70	68	160	56	75	29.2969	5.68	12.71	6.3	1.86	0.99	2.33
100203012	2	2	44	2	2	2	2	2	2	108	104	108	106.667	74	72	68	71.3333	156	56	84	34.5168	4.64	4.85	5.3	0.56	1.17	1.21
100203013	2	1	44	2	2	2	2	2	2	120	122	124	122	74	72	70	72	156	59	88	36.1604	5.26	7.43	5.8	0.71	0.75	2.08
100203015	2	1	59	1	2	2	2	2	2	124	122	120	122	78	74	72	74.6667	151	56	81	35.5248	7.22	15.13	7.6	1.98	1.01	2.12
100203016	2	2	59	2	3	2	2	2	2	98	98	98	98	74	74	74	74	155	46	68	28.3039	5.09	6.04	5.3	0.85	0.83	1.64
100203019	2	1	54	2	1	2	2	2	2	124	122	126	124	78	76	74	76	158	76	88	35.2508	5.57	9.48	6.6	2.06	0.62	1.87
100203039	2	2	54	2	2	2	2	2	2	100	102	100	100.667	80	72	74	75.3333	148	52	78	35.6099	5.38	6.87	5.8	1.41	1.36	2.2
100203048	2	1	58	2	4				2	120	118	118	118.667	72	78	70	73.3333	148	59	82	37.4361	5.15	6.39	6.4	0.88	0.64	1.61
100203051	2	1	79	2	2				2	138	140	140	139.333	90	80	88	86	169	78	94	32.912	5.88	10.7	6.1	1.03	1.09	1.19
100203052	2	1	48	2	3				2	120	118	122	120	70	72	72	71.3333	158	56	74	29.6427	5.13	7.22	5.4	0.81	0.82	1.73
100203053	2	1	54	2	4	2	2	2	1	100	100	104	101.333	72	70	80	74	152	51	74	32.0291	5.14	7.04	6.1	0.8	0.85	1.49
100203054	2	1	47	2	3	1	2	2	2	160	162	160	160.667	100	90	98	96	160	78	95	37.1094	5.51	9.23	6.3	2.06	1	2.08
100203055	2	1	52	2	3				2	138	130	132	133.333	70	74	72	72	147	54	78	36.0961	4.91	8.76	6	0.54	1.29	1.44
100203056	2	1	41	2	4				2	102	100	104	102	74	70	72	72	154	60	81	34.1542	5.31	11.87	5.9	0.61	1.09	1.92
100203060	2	2	52	2	4	1			2	120	122	118	120	70	68	74	70.6667	147	50	69	31.9311	5.66	8.61	6.3	1.08	0.79	1.29
100203061	2	1	47	2	3	2	2	2	2	110	100	100	103.333	70	80	76	75.3333	162	60	84	32.0073	5.7	6.73	5.6	5.41	0.92	2.88
100203070	2	2	58	2	2	2	2	1	2	120	114	120	118	74	78	80	77.3333	150	56	77	34.2222	5.33	7.32	6.3	0.79	0.83	2.21
100203076	2	1	84	2	1	2	2	2	2	138	134	130	134	74	72	70	72	140	56	93	47.449	5.56	12.08	6.6	1.42	1.06	2.83
100203079	2	2	57	2	3	2	2	2	2	138	134	130	134	80	78	72	76.6667	154	50	78	32.8892	4.95	6.06	5.6	1.26	0.75	3.12
100203083	2	1	59	2	2	2	2	2	2	104	112	114	110	78	78	72	76	152	56	83	35.9245	5.61	7.73	5.7	1.45	0.84	2.04
100203085	2	1	51	2	2	2	2	2	2	125	126	125	125.333	74	73	72	73	165	66	83	30.4867	5.16		6.1	1.37	1.02	2.91
100203097	2	2	54	2	3					118	120	114	117.333	72	70	72	71.3333	155	52	76	31.6337	5.38	6.46	6	1.16	1.42	2.4
100203098	2	1	60	2	3	2	2	2	2	128	130	132	130	80	84	82	82	165	75	90	33.0579	5.09	8.48	6	0.79	0.93	1.4
100203099	2	2	51	1	2	2	2	2	2	134	132	130	132	86	84	80	83.3333	157	62	86	34.8899	6.43	7.68	6.3	0.84	0.82	1.55
100203103	2	1	67	1	2	1	2		1	124	120	128	124	78	74	72	74.6667	155	51	78	32.4662	6.54	12.97	7.2	1.11	1.08	1.85
100203107	2	1	59	2	3				2	108	100	104	104	72	70	70	70.6667	158	68	94	37.6542	5.83	7.49	5.4	1.2	0.88	3.06
100203113	2	2	59	2	2	2	2	2	2	120	118	111	116.333	70	68	70	69.3333	149	55	76	34.2327	10.61	19.82	8.3	0.88	1.13	2.79
100203115	2	1	45	2	2	2	2	2	2	124	120	124	122.667	78	80	76	78	157	63	78	31.6443	5.51	6.65	5.7	0.6	1.37	1.8
100203118	2	1	59	2	3	2	2	2	2	94	96	100	96.6667	68	70	74	70.6667	154	53	73	30.7809	5.11	6.47	6	1.57	1.03	1.76
100203122	2	1	49	2	2	2	2	2	2	120	118	120	119.333	76	70	74	73.3333	156	58	80	32.8731	5.37	8.07	5.6	1.2	0.95	1.11
100203125	2	2	42	1	2	2	2	2	1	98	96	90	94.6667	60	64	66	63.3333	150	48	78	34.6667	17.06	24.2	14.5	2.12	1.01	2.09
100203126	2	1	71	2	4	2	2	2	2	90	92	94	92	68	70	72	70	150	55	88	39.1111	5.6	6.19	6	0.85	0.92	1.82
100203127	2	2	56	2	4	2	2	1	2	120	118	110	116	70	68	70	69.3333	148	55	84	38.3492	5.29	6.34	5.7	1.68	0.87	2.15
100203129	2	1	52	2	3	2	2	2	2	170	168	168	168.667	100	102	70	90.6667	160	64	84	32.8125	5.92	8.95	6.5	3.93	0.67	1.99
100203132	2	2	46	2	3	2	2	2	2	130	140	138	136	70	78	50	66	160	60	86	33.5938	5.34	7.5	6.1	1.23	1.05	1.98
100203133	2	1	60	2	4	2	2	1	2	108	110	112	110	68	70	74	70.6667	152	70	88	38.0886	5.2	6.81	5.8	1.14	0.97	1.64
100203137	2	2	58	2	2	2	2	2	2	140	138	140	139.333	98	98	94	96.6667	154	60	84	35.4191	5.6	9.04	6.1	0.67	0.81	2.13
100203140	2	2	56	2	3	2	2	2	2	108	110	120	112.667	68	70	70	69.3333	158	55	86	34.4496	6.08	8.17	6.5	1.56	0.98	3.03
100203142	2	2	70	2	1				2	140	130	138	136	90	78	78	82	155	65	88	36.6285	7.26	16.1	6.8	1.61	0.83	2.41
100203147	2	2	96	2	1	2	2	2	2	128	118	118	121.333	80	70	82	77.3333	150	60	80	35.5556	5.34	6.41	6.2	0.74	0.88	1.14
100203149	2	1	65	2	3	2	2	2	2	84	88	88	86.6667	68	62	70	66.6667	154	55	78	32.8892	5.15	6.07	5.7	0.66	1.56	1.9
100203153	2	2	54	2	3	1	1		2	120	118	118	118.667	80	78	80	79.3333	145	60	85	40.4281	5.52	10.18	6.5	3.53	0.88	2.19
100203158	2	1	53	1	2	2	2	2	1	128	126	124	126	72	70	70	70.6667	156	56	70	28.764	9.69	19.94	8.6	3.6	1.03	2.91
100203161	2	2	52	2	4	2	2	2	2	118	120	111	116.333	88	80	70	79.3333	157	69	81	32.8614	5.44	10.45	6.6	1.44	0.85	2.61
100203164	2	1	57	2	2	2	2	2	2	140	132	112	128	82	82	80	81.3333	158	68	78	31.245	4.89	7.57	5.9	0.75	1.09	1.87
100203167	2	2	59	2	4	2	2	2	2	142	140	144	142	100	98	72	90	160	60	80	31.25	5.22	7.44	5.9	0.77	1.02	1.75
100203175	2	1	69	1	2	1	2	2	2	120	118	118	118.667	88	72	70	76.6667	158	64	80	32.0461	14.65	22.92	9.3	> 16.05	0.37	5.21
100203181	2	1	69	2	2	2	2	2	2	112	110	112	111.333	68	70	70	69.3333	158	60	80	32.0461	5.09	7.61	5.9	1.57	1.4	3.54
100203182	2	1	47	2	2	2	2	2	2	112	120	120	117.333	76	72	78	75.3333	158	60	78	31.245	4.99	6.19	6.2	0.73	1.41	1.72
100203184	2	2	42	2	3	2	2	2	2	108			108	68			68	155	52	70	29.1363	5.47	8.4	5.5	0.77	1.25	1.31
100203188	2	1	55	2	4			2	2	95	90	112	99	70	70	70	70	155	60	83	34.5473	5.91	7	6	1.71	0.89	2.06
100203189	2	2	48	2	3	2	2	2	2	90	100	120	103.333	68	72	70	70	159	52	70	27.6888	5.64	5.56	5.8	1.3	0.97	1.9
100203193	2	1	66	1	2	1			2	180	182	180	180.667	100	98	100	99.3333	155	68	98	40.7908	12.36	19.38	9.1	1.15	1.07	2.03
100203197	2	2	66	1	2	1		1	2	158	148	140	148.667	94	90	70	84.6667	160	72	101	39.4531	10.87	16.28	7	3.12	0.86	2.51
100203200	2	2	52	2	4				2	100	120	100	106.667	60	70	60	63.3333	155	45	70	29.1363	5.54	10.99	5.5	0.9	1.72	2.35
100203201	2	1	57	2	3	2	2	2	2	158	158	158	158	70	80	84	78	150	75	97	43.1111	5.67	8.82	6.1	1.62	1.28	2.8
100203203	2	1	65	2	2				2	100	102	104	102	70	70	72	70.6667	149	55	61	27.4762	6.05	6.44	5.7	1.24	0.89	1.49
100203211	2	2	67	2	2	2	2	1	2	138	130	132	133.333	78	70	74	74	153	56	87	37.1652	5.74	7.21	5.6	0.9	0.88	2.25
100203213	2	1	70	2	3	1	2	2	2	170	170	170	170	100	102	100	100.667	162	63	89	33.9125	6.04	8.86	6.6	1.06	0.93	2.23
100203215	2	1	81	2	1	2	2	2	2	125	126	130	127	70	80	79	76.3333	155	50	73	30.385	5.25		6.6	1.52	0.57	1.56
100203221	2	1	78	2	1	1	2	2	2	160	170	164	164.667	92	96	94	94	152	48	70	30.2978	5.14	5.93	5.6	1.03	1.22	0.9
100203224	2	1	61	2	3	2	2	2	2	160	162	162	161.333	100	92	70	87.3333	154	45	69	29.0943	5.07	9.29	5.7	0.79	1.23	2.04
100203226	2	1	57	1	2	2	2	1	2	120			120	80			80	155	64	108	44.9532	8.55	10.82	8.3	1.52	1.92	3.76
100203228	2	1	43	2						90	92	90	90.6667	60	60	60	60	152	48	67	28.9993	5.36	5.35	5.3	0.72	1	2.18
100203229	2	1	41	2						90	92	90	90.6667	60	60	62	60.6667	150	50	87	38.6667	4.83	7.31	6	0.78	0.88	1.37
100203230	2	1	66	2	2	2	2	2	2	112	120	128	120	80	78	70	76	153	48	78	33.3205	5.55	10.51	6.1	0.74	0.8	1.15
100203233	2	1	65	2	3	1	2	2	2	150	118	152	140	90	90	92	90.6667	154	76	103	43.4306	5.07	4.89	6.1	1.12	1.51	2
100203234	2	2	57	2	2	2	2	2	2	138	138	130	135.333	72	88	86	82	152	55	84	36.3573	5.56	9.04	5.9	0.77	1.04	1.43
100203235	2	1	43	2	2	2	2	2	2	130	130	130	130	70	72	80	74	155	62.5	82	34.1311	6.15	8.79	6	0.6	1.34	1.47
100203238	2	1	45	2	3	2	2	2	2	90	92	90	90.6667	60	62	62	61.3333	160	57	80	31.25	4.96	4.91	5.5	0.59	0.93	1.27
100203239	2	1	48	2	3	2	2	2	2	90	92	90	90.6667	60	60	62	60.6667	156	50	66	27.1203	4.8	7.97	5.7	0.73	1.16	1.96
100203240	2	1	56	2	2	1	2	1	1	150	152	150	150.667	100	98	100	99.3333	152	67	97	41.9841	5.71	9.21	6.4	2.18	1.12	2.95
100203241	2	1	80	2	2	1	2	2	2	120	130	135	128.333	80	85	80	81.6667	165	52	81	29.7521	6.75	14.6	6.9	1.34	1.28	3.89
100203243	2	2	56	2	3	2	2	2		90	92	94	92	60	62	62	61.3333	150	42	70	31.1111	4.88	6.53	5.7	2.25	1.78	3.1
100203244	2	1	50	2						100	108	108	105.333	80	78	80	79.3333	160	75	74	28.9062	4.96	4.51	5.8	0.94	0.9	1.89
100203247	2	2	63	2	3	2	2	2	2	150	148	148	148.667	100	98	98	98.6667	153	50	79	33.7477	5.76	5.46	6.1	1.25	0.79	2.73
100203248	2	2	55	2	3	2	2	2	2	120	122	120	120.667	70	68	72	70	150	49	76	33.7778	5.69	5.46	6.2	0.48	0.6	1.29
100203250	2	2	59	2	2				2	160	160	160	160	94	96	90	93.3333	146	44	74	34.7157	5.28	9.85	6.1	1.11	0.9	1.84
100203256	2	1	52	2	2	2	2	2	2	140	140	140	140	80	90	90	86.6667	155	54	77	32.0499	5.36	6.93	5.7	1.09	0.87	1.37
100203257	2	1	59	2	3				2	128	120	118	122	76	70	74	73.3333	155	52.5	80	33.2986	5.13	5.58	5.8	0.68	1.12	1.2
100203259	2	2	54	2	1	2	2	2	2	128	124	120	124	74	72	70	72	166	62	79	28.6689	4.67	5.08	5.3	0.76	0.9	1.19
100203260	2	2	73	2	3	1			2	138	130	135	134.333	70	70	80	73.3333	150	55	75	33.3333	5.14	7.84	6	0.83	1.04	2.35
100203261	2	1	58	2	1	2	2	2	2	124	120	118	120.667	80	78	78	78.6667	151	63	91	39.9105	5.71	7.69	6.2	0.78	0.97	2.23
100203262	2	2	68	2	2				2	98	90	92	93.3333	64	94	80	79.3333	150	49	78	34.6667	5	5.55	6	0.81	1.66	1.6
100203273	2	1	43	2	3				2	118	114	120	117.333	72	70	74	72	153	59	78	33.3205	4.63	6.21	5.3	1.06	0.79	1.52
100203274	2	2	56	2	2			1	2	102	108	112	107.333	72	74	70	72	160	66	92	35.9375	5.75	10.28	6.4	1.44	0.92	1.42
100203276	2	1	52	2	1				2	94	92	90	92	68	64	64	65.3333	152	59	84	36.3573	5.72	8.3	6.5	1.67	1.12	2.17
100203278	2	1	48	2	1	2	2	2	2	132	138	140	136.667	88	84	82	84.6667	152	52	79	34.1932	4.61	5.26	5.8	0.76	1.33	1.73
100203279	2	1	43	2	3	2	2	2	2	108	112	110	110	64	68	68	66.6667	152	53	74	32.0291	5.33	8.43	5.8	1.01	0.98	2
100203286	2	1	69	2	1	2	2	2	2	144	142	140	142	82	80	80	80.6667	144	62	92	44.3673	6.18	10.96	5.5	2.65	0.91	1.61
100203288	2	2	51	2	3	2	2	2	2	118	120	124	120.667	74	72	78	74.6667	158	54	83	33.2479	5.36	9.87	6.1	1.88	1.19	2.36
100203289	2	1	43	2	1	2	2	2	2	128	130	132	130	88	88	84	86.6667	152	51	84	36.3573	4.95	7.54	5.7	0.85	0.75	1.92
100203290	2	1	54	1	3	2	2	2	2	124	120	120	121.333	72	72	78	74	150	62	88	39.1111	10.14	15.88	8.4	3.01	0.81	2.76
100203293	2	2	57	2	1	2	2	2	2	132	130	128	130	76	74	72	74	158	58	88	35.2508	5.36	6.88	6	8.59	0.73	2.4
100203296	2	1	73	2	1	2	2	2	2	142	140	140	140.667	88	80	78	82	145	62	88	41.8549	5.78	9.55	6.8	1.65	1.23	3.6
100203299	2	2	58	2	3	2	2	2	2	108	112	110	110	78	74	70	74	148	64	88	40.1753	5.2	9.1	5.8	2.53	1.13	2.75
100203306	2	2	59	2	3	2	2	2	2	104	102	100	102	80	80	80	80	155	60	88	36.6285	5.43	8.17	5.3	2.07	0.85	1.34
100203307	2	2	46	2	1	2	2	2	2	104	110	110	108	68	64	62	64.6667	158	54	76	30.4438	5.12	6.45	5.9	1.71	1.19	2.38
100203308	2	1	49	2						124	120	118	120.667	82	80	80	80.6667	153	61	88	37.5924	6.67	8.37	5.9	2.28	1.33	2.75
100203312	2	2	65	2	2	2	2	2	2	118	120	124	120.667	78	74	72	74.6667	149	54	88	39.6379	5.38	8.31	5.7	2.17	1.24	1.94
100203318	2	1	61	2	4	2	2	2	2	128	124	120	124	74	72	72	72.6667	150	71	82	36.4444	7	10.89	6.4	1.44	1.29	2.94
100203322	2	1	62	2	4	2	2	2	2	104	102	102	102.667	68	64	68	66.6667	149	43	88	39.6379	5.05	3.93	5.8	0.57	1.05	1.98
100203324	2	1	43	2	3	2	2	2	2	90	94	98	94	62	64	64	63.3333	161	55	88	33.9493	5.28	7.08	5.7	1.5	1.32	2.43
100203328	2	1	70	2	1	2	2	2	2	134	132	130	132	82	80	82	81.3333	163	45	81	30.4867	6.06		5.9	1.46	0.86	1.52
100203329	2	2	60	1	4	1	2	1	2	140	142	142	141.333	88	88	90	88.6667	158	70	96	38.4554	8.43	17.3	6.9	1.88	1.22	2.97
100203331	2	1	68	2	3	2	2	1	2	124	120	118	120.667	80	78	78	78.6667	158	58	88	35.2508	5.8	10.4	6.6	2.32	0.95	2.78
100203333	2	2	56	2				2	2	104	102	112	106	78	74	78	76.6667	156	62	92	37.8041	4.84	6.75	5.5	0.92	1.32	2.07
100203337	2	1	75	2	1	2	1	2	2	118	120	120	119.333	70	70	72	70.6667	147	56	92	42.5749	4.96	10.65	6.5	1.7	0.95	2.36
100203338	2	1	72	1	1	1	2	2	2	124	120	118	120.667	78	80	74	77.3333	160	55	75	29.2969	7.19	11.9	6.9	2	1.61	3.37
100203345	2	1	55	2	1	1	2	2	2	142	140	144	142	98	94	92	94.6667	155	58	85	35.3798	5.52	7.35	5.6	1.59	1.05	2.09
100203346	2	2	67	2	2	2	2	2	2	144	142	140	142	78	74	72	74.6667	152	67	99	42.8497	5.25	7.17	5.8	5.89	1.31	2.63
100203347	2	1	73	2	1	2	2	2	2	108	112	114	111.333	74	72	74	73.3333	145	40	84	39.9524	7.88	14.45	6.3	0.78	0.85	1.75
100203349	2	1	85	2	1	1	2	2	2	144	142	140	142	78	80	80	79.3333	135	44	87	47.7366	5.31	10.6	5.8	0.92	0.9	2.28
100203350	2	1	53	2	3	2	2	2	2	124	120	118	120.667	82	80	78	80	158	50.5	82	32.8473	4.4	6.72	5.7	1.53	0.9	1.91
100203351	2	2	60	2	2			2	2	128	124	120	124	80	78	80	79.3333	152	52	84	36.3573	6.16	10.51	6.3	2.5	0.89	3.28
100203353	2	2	60	2	1	2	2	2	2	142	140	138	140	78	80	82	80	145	52	88	41.8549	13.66	22.52	11	1.68	1.01	2.68
100203354	2	1	65	2	1	1	2	2	2	155	150	152	152.333	92	92	90	91.3333	161	54	88	33.9493	5.39	9.95	6.9	0.63	1.12	2.16
100203357	2	1	78	2	1	2	2	2	2	120	124	120	121.333	70	70	74	71.3333	135	46	82	44.9931	5.34	6.51	6.3	0.63	1.1	1.92
100203358	2	2	53	2	3	1		2	2	120	120	118	119.333	70	74	72	72	150	54	74	32.8889	18.68	33.05	16.3	0.82	1.52	2.33
100203363	2	2	56	2	2	2	2	2	2	165	160	160	161.667	95	90	90	91.6667	160	70	102	39.8438	5.58	9.56	6.5	1.04	0.82	2.29
100203364	2	1	62	2	2	1	2	1	2	158	152		155	90	92		91	160	83	116	45.3125	5.73	12.26	6.8	1.4	0.99	3.32
100203366	2	1	65	2	3	1	2	2	2	140	140	140	140	88	90	90	89.3333	152	56	84	36.3573	5.46	9.72	6.2	1.19	1.32	4.79
100203367	2	2	76	2	1	2	2	2	2	144	140	142	142	88	90	88	88.6667	146	48	82	38.4688	5.1	10.88	5.9	0.82	1.3	2.09
100203368	2	1	63	1	3	2	2	2	2	150	152	154	152	90	90	90	90	144	43	77	37.1335	8.39	25.59	8.1	1.19	1.27	1.43
100203371	2	1	74	2	1	2	2	2	2	130	128	120	126	80	74	70	74.6667	155	58	89	37.0447	6	7.73	6.5	1.04	1.43	2.22
100203374	2	1	68	1	2	1	2	2	2	148	146	140	144.667	92	94	97	94.3333	154	54	84	35.4191	7.12	10.29	7.4	0.99	1.12	1.88
100203380	2	1	73	2	2	1	2	2	2	130	128	120	126	80	80	78	79.3333	151	46	83	36.4019	5.61	7.96	6.6	1.2	0.95	2.2
100203381	2	1	64	2	3	1	2	2	2	106	108	102	105.333	60	64	60	61.3333	153	55	82	35.0293	6.37	9.21	5.7	1.6	1.55	2.07
100203394	2	1	45	2	3	2	2	2	2	120	122	124	122	70	72	74	72	155	56	79	32.8824	4.5	6.95	5.8	1.54	1.41	2.27
100203396	2	1	46	2	3	1	2	2	2	120	110	124	118	80	70	74	74.6667	155	64	82	34.1311	5.3	5.76	5.5	1.6	0.99	1.76
100203399	2	1	75	2	3	2	2	2	2	110	120	114	114.667	70	70	78	72.6667	160	70	89	34.7656	6.95	10.25	7.8	2.07	1.04	2.82
100203401	2	2	52	1	4	1	2	2	2	140	142	140	140.667	98	96	96	96.6667	150	60	86	38.2222	5.26	7.07	5.7	4.06	0.82	1.64
100203405	2	1	78	2	4	2	2	2	2	128	124	120	124	64	62	64	63.3333	152	62	96	41.5512	5.82	8.9	6.7	3.68	1.19	1.9
100203411	2	1	76	2	5	1	2	2	2	108	112	120	113.333	74	78	80	77.3333	152	62	100	43.2825	5.35	10.1	6	1.94	0.97	2.16
100203412	2	1	77	2	2	1	2	2	2	132			132	76			76	136	53	100	54.0657	5.42	9.75	5.7	0.89	1.17	2.18
100203415	2	2	62	2	5	2	2	2	2	120			120	70			70	155	68	105	43.7045	5.6	9.83	6.6	1.19	1.03	2.8
100203416	2	2	73	2	1	1	2	2	2	140			140	88			88	150	56	103	45.7778	6.22	14.43	7.2	3.47	0.7	2.1
100203418	2	2	78	2	3	2	2	2	1	104	102	100	102	68	62	60	63.3333	145	43	75	35.6718	5.67	10.97	6.3	0.59	0.71	1.45
100203423	2	1	62	2	3	1	2	2	2	124	120	120	121.333	78	74	78	76.6667	149	50	83	37.3857	4.72	10.4	6.1	2.18	1.09	2.37
100203424	2	1	78	2	3	1	2	2	2	138	134	142	138	82	80	84	82	152	55	87	37.6558	5.57	18.81	6.5	1.52	1.17	1.75
100203425	2	2	64	2	1	1	1	2	2	148	144	147	146.333	78	74	72	74.6667	153	62	88	37.5924	5.49	8.07	6	3.95	0.73	2.09
100203427	2	2	59	2	2	1	2	2	2	158	154	152	154.667	92	90	88	90	154	44	69	29.0943	4.87	5.57	5.9	0.79	1.02	1.28
100203429	2	1	56	2	2	2	2	2	2	138	130	120	129.333	80	80	70	76.6667	152	60	86	37.223	6.56	12.29	6.6	5.56	0.88	1.9
100203430	2	1	78	2	3	1	1	1	2	144	140	142	142	78	80	78	78.6667	160	60	93	36.3281	5.08	9.88	6.2	1.55	0.95	2.08
100203431	2	1	65	2	4	1	2	2	2	144	142	140	142	88	86	84	86	160	60	88	34.375	6.33	6.16	6.2	1.38	1.07	2.04
100203435	2	1	59	2	3	2	2	2	1	124	120	118	120.667	80	78	74	77.3333	153	75	98	41.8642	5.69	10.64	6.9	1.69	1.83	3.32
100203436	2	2	57	1	3	2	2	2	1	132	125	128	128.333	76	75	74	75	158	60	87	34.8502	7.01	14.02	7.4	2.14	0.83	2.14
100203437	2	1	57	2	1	1		1	2	138	134	138	136.667	88	84	82	84.6667	153	74	100	42.7186	5.55	8.86	6.2	1.79	0.67	1.97
100203439	2	2	61	1	3	2	2	2	2	104	102	100	102	68	70	70	69.3333	150	50	76	33.7778	7.6	10.56	6.7	1.03	1.03	2.2
100203441	2	2	59	2	5	1			2	128	124	120	124	84	82	80	82	153	54	77	32.8933	5.41	8.53	6.2	1.4	1.07	1.61
100203443	2	2	76	1	2				1	114	120	124	119.333	78	80	78	78.6667	158	58	86	34.4496	6.51	12.07	6.7	1.77	1.02	2.43
100203445	2	2	58	2	2	2	2	2	2	98	94	90	94	74	72	68	71.3333	155	60.5	88	36.6285	4.75	7.43	6.6	1.06	0.78	2.38
100203446	2	2	58	2	4	2	2	2	2	128			128	88			88	155	56.5	88	36.6285	5.83	6.14	5.8	1.33	1.13	2.24
100203448	2	1	49	2	3	2	2	2	2	112	120	110	114	78	80	74	77.3333	153	49	76	32.4661	5.17	5.56	6.1	0.94	1.15	1.65
100203452	2	2	86	2	2	1	2	2	2	134	130	128	130.667	78	74	72	74.6667	139	46	93	48.1342	5.98	9.97	6.1	2.7	1.13	2.22
100203453	2	2	70	1	2	2	2	2	1	128	124	120	124	80	78	70	76	151	53.5	86	37.7176	8.54	14.91	7.9	5.04	1.07	3.47
100203457	2	1	58	2	3	2	2	2	2	128	124	130	127.333	74	72	74	73.3333	162	57	83	31.6263	5.2	6.36	5.8	1.41	1.11	2.72
100203461	2	1	61	2	2	1			2	134	132	130	132	82	80	84	82	155	50	78	32.4662	4.82	5.13	6.1	1.02	1.16	2.55
100203463	2	1	55	2	4				1	104	102	110	105.333	78	74	80	77.3333	160	58	80	31.25	4.8	6.33	5.7	1.59	1.09	2.71
100203466	2	2	44	2	3	2	2	2	2	124	120	118	120.667	80	70	74	74.6667	158	61	84	33.6485	5.91	8.48	5.2	2.99	1.22	2.05
100203467	2	2	70	2	2	2	2	2	2	120			120	75			75	149	54	82	36.9353	5.57	11.3	6.3	1.19	1.64	2.58
100203468	2	2	57	2	3	1	2	2	2	118	120	124	120.667	68	70	74	70.6667	161	58	70	27.0051	4.84	6.33	6.4	0.71	1.76	1.91
100203469	2	1	73	2	1	2	2	2	2	124	120	118	120.667	78	74	72	74.6667	145	50	76	36.1474	7.3	13.41	5.9	1.23	0.9	2.28
100203472	2	1	52	2	2	2	2	2	2	108	106	104	106	64	68	70	67.3333	155	64	82	34.1311	5.77	7.49	6.5	1.94	0.68	2.04
100203474	2	1	46	2	3	2	2	2	2	94	92	98	94.6667	72	70	68	70	156	50	72	29.5858	4.73	7.1	6.1	0.94	0.77	1.85
100203478	2	2	44	2	2	2	2	2	2	118	120	124	120.667	74	72	74	73.3333	160	54	77	30.0781	4.77	6.67	5.6	0.46	0.9	1.05
100203479	2	2	57	2	3	1	2	2	2	118	120	114	117.333	74	72	70	72	155.5	51	75	31.017	5.59	7.07	6	0.59	1.12	1.56
100203487	2	1	60	2	2	2	2	2	2	132	130	129	130.333	86	83	80	83	155	60	87	36.2123	5		6.1	0.89	1.19	3.2
100203493	2	1	61	2	4	2	2	2	2	104	102	100	102	72	70	78	73.3333	162	54	77	29.34	4.85	6.46	6.4	1.46	1.1	2.74
100203494	2	2	57	2	2	2	2	2	2	108	104	102	104.667	74	72	72	72.6667	147	50	80	37.0216	8.39	5.22	6	1.74	0.86	2.29
100203495	2	1	60	2	2	2	2	2	2	138	134	130	134	84	80	80	81.3333	160	63	90	35.1562	4.66	8.23	5.7	4.58	0.94	1.6
100203500	2	2	58	1	5					128	124	120	124	84	82	80	82	158	58	87	34.8502	11.29	18.82	10.8	3.63	0.95	1.29
100203509	2	1	55	2	1	2	2	2	2	112	108	108	109.333	75	69	69	71	150	45	72	32	5.08	7.51	5.8	2.92	0.85	1.13
100203528	2	2	45	1	1				2	139	128	125	130.667	99	88	90	92.3333	155	57	78	32.4662	14.21	21.52	11.4	0.74	1.24	1.8
100203531	2	1	67	2	1	2	2	2	2	145	148		146.5	88		85	86.5	162	73	89	33.9125	6.96	19.08	7.5	2.05	1.24	2.54
100203533	2	1	47	2	3	2	2	2	2	113	120	102	111.667	76	76	77	76.3333	153	47	64	27.3399	5.44	7.66	5.7	1.1	1.36	2.26
100203534	2		49	2	4				2	126	111	111	116	75	74	75	74.6667	163	66.5	70	26.3465	4.53	5.6	5.8	0.46	1.08	1.45
100203538	2	2	49	2	1	2	2	2	2	136	109	118	121	87	75	79	80.3333	152	48	70	30.2978	5.28	7.42	5.8	0.45	0.77	1.83
100203540	2	1	47	2	1	1	2	2	2	138	143	133	138	97	92	93	94	152	61	92	39.8199	5.55	11.65	6	6.31	0.82	1.59
100203542	2	1	44	2	4	2	2	2	2	118	121	122	120.333	75	74	68	72.3333	163	92.5	100	37.6378	5.31	6.66	5.4	1.07	0.55	1.57
100203543	2	1	54	2	4	2	2	2	2	109	101	96	102	69	67	65	67	154	72	92	38.7924	4.96	4.55	5.9	1	0.66	1.48
100203546	2	1	62	2	4	2	2	2	2	118	124	114	118.667	82	81	81	81.3333	168	60	72	25.5102	5.51	4.5	5.9	0.69	1.2	2.1
100203550	2	1	60	2	4	1	2	2	2	129	122	122	124.333	89	85	83	85.6667	162	74	86.4	32.9218	5.12	9.17	5.9	2.32	0.84	2.23
100203555	2		61	2	2	2	2	2	2	110	108	105	107.667	64	56	58	59.3333	162	50	66	25.1486	5.41	5.86	5.2	0.84	0.98	1.52
100203561	2	2	54	2	3	2	2	2	2	146	142	136	141.333	80	76	80	78.6667	158	60	83	33.2479	5.9	8.11	6.6	2.45	0.56	1.14
100203564	2	1	60	2	4	2	2	2	2	121	126	124	123.667	78	78	77	77.6667	160	57	92	35.9375	7.57	13.75	7.6	3.51	1.23	3.01
100203567	2	1	55	2	3	2	2	2	2	122	110	116	116	83	87	78	82.6667	155	53	72	29.9688	4.91	7.71	6.4	1.08	1.11	1.76
100203569	2	1	58	2	4	2	2	2	2	102	103	107	104	78	78	75	77	158	68	88.2	35.3309	5.96	9.52	6.3	1.85	0.97	2.58
100203573	2	1	60	2	5	2	2	2	2	91	88	86	88.3333	57	56	54	55.6667	156	51	59	24.2439	5	5.78	6.1	1.39	1.4	2.44
100203576	2	1	42	2	4	2	2	2	2	111	121	112	114.667	89	83	83	85	158	63.5	84	33.6485	4.9	7.56	6	5.29	0.95	2.01
100203577	2		41	2	3	2	2	2	2	102	101	99	100.667	73	71	65	69.6667	158	75	83	33.2479	5.68	6.53	5.9	0.81	1.44	1.78
100203578	2	1	52	2	3	2	2	2	1	156	152	153	153.667	101	99	94	98	161	78	84	32.4062	5.52	6.01	5.9	2.38	1.17	2.76
100203579	2	2	57	2	4	2	2	2	1	136	139	146	140.333	76	77	73	75.3333	148	51	78	35.6099	5.99	7.59	6.3	1.31	1.12	1.57
100203584	2	1	45	2	2	2	2	2	2	139	132	129	133.333	86	86	83	85	150	40	60	26.6667	5.71	7.05	5.9	0.75	1.42	2.11
100203587	2	2	46	2	3	2	2	2	2	109	110	104	107.667	76	74	69	73	152	57	76	32.8947	5.6	5.34	6.2	1.6	1.13	2.29
100203588	2	2	44	2	2	2	2	2	2	129	124	122	125	71	67	69	69	154	51.2	80.2	33.8168	5.64	7.5	5.8	1.61	1.36	1.91
100203589	2	2	41	2	2	2	2	2	2	121	112	111	114.667	81	79	74	78	155	54.2	64	26.6389	5.47	6.92	5.4	0.52	1.11	1.01
100203593	2		52	2	3	2	2	2		89	90	90	89.6667	59	60	60	59.6667	154	46	64	26.986	4.99	6.22	5.8	0.75	1.14	1.63
100203594	2	2	41	2	3	2	2	2	1	91	97	92	93.3333	60	64	68	64	165	56.2	74.6	27.4013	4.71	7.22	5.5	0.99	0.93	1.87
100203596	2	1	59	2	3	2	2	2	2	128	140	150	139.333	109	107	100	105.333	150	51	73	32.4444	5.88	6.92	6.1	2.24	1.51	3.02
100203601	2	1	50	2	4	2	2	2	2	108	116	102	108.667	78	75	71	74.6667	158	53	70	28.0404	4.94	6.82	6.4	1.1	0.89	1.86
100203602	2	1	56	2	3	2	2	2	1	102	101	99	100.667	69	63	62	64.6667	158	63.4	77.6	31.0848	5.42	8.09	6.1	0.91	1	1.91
100203603	2	1	43	2	3	2	2	2	2	99	97	99	98.3333	61	61	60	60.6667	160	62	73	28.5156	5.5	7.17	5.9	0.36	1.11	1.55
100203604	2	2	49	2	4	2	2	2	1	119	109	108	112	81	76	74	77	160	66	80	31.25	5.06	6.09	6	6.01	1.26	3.03
100203609	2		47	2	4	2	2	2	2	95	95	94	94.6667	61	64	63	62.6667	166	54	72	26.1286	4.84	5.98	5.9	0.64	0.89	1.87
100203610	2	2	75	2	2	1	2	2	2	158			158	88			88	156	64	82	33.6949	5.23	8.84	6.1	1.07	0.65	1.16
100203613	2	2	49	2	2	2	2	1	2	130	111	115	118.667	72	71	67	70	160	68	84	32.8125	5.21	9.33	6.3	3.21	0.75	1.34
100203614	2	1	62	2	2	2	2	2	2	155	135	138	142.667	88	89	88	88.3333	156	43	64	26.2985	4.85	5.37	5.4	0.53	0.88	0.99
100203617	2	2	51	2	4	2	2	2	2	125	116	113	118	80	79	72	77	152	48.2	66	28.5665	5.05	5.98	6	0.66	0.79	1.01
100203620	2	1	50	2	3	2	2	2	2	142	132	135	136.333	97	90	92	93	156	48	64.2	26.3807	5.21	7.76	6.1	0.51	0.64	1.3
100203625	2	2	43	2	3	2	2	2	2	131	118	122	123.667	84	78	75	79	150	49.2	60	26.6667	4.53	6.24	5.7	0.73	1.21	1.47
100203627	2	2	59	2	2	1	2	2	2	148	151	142	147	96	93	91	93.3333	146	51	70	32.8392	4.96	7.1	6.2	1.74	1.4	2.07
100203635	2	1	49	2	3	1	2	2	2	132	131	125	129.333	96	92	89	92.3333	156	68.2	82.4	33.8593	5.42	9.34	6.1	0.8	1.02	1.61
100203639	2		41	2	2	2	2	2	2	108	110	108	108.667	72	74	70	72	155	50	74	30.8012	5.09	9.34	5.8	0.44	0.77	0.96
100203641	2	1	51	2	4	2	2	2	1	98	98	100	98.6667	65	64	67	65.3333	158	53	66	26.4381	6.09	8.7	6.1	0.83	1.18	1.93
100203642	2	2	52	2	4	1	2	2	1	157	155	159	157	94	93	89	92	155	62	79	32.8824	5.04	9.42	6	0.99	0.95	1.72
100203644	2	2	45	2	4	2	2	2	2	113	110	103	108.667	70	70	68	69.3333	144	44	62	29.8997	4.28	5.85	5.7	1.27	1.32	2.26
100203649	2	1	45	2	2	2	2		1	96	108	97	100.333	65	67	65	65.6667	158	50	60	24.0346	4.95	6.3	6.3	0.58	1.27	1.41
100203651	2	2	59	2	3	2	2	2	2	117	111	114	114	87	80	80	82.3333	156	60	77	31.6404	5.62	6.75	6	1.15	0.83	1.77
100203652	2	1	67	2	1	1			2	151	153	155	153	81	80	77	79.3333	154	68	99	41.744	6.56	8.05	6.1	2.92	0.98	2.82
100203654	2	1	43	2	2	2	2	2	2	110	107	105	107.333	69	71	63	67.6667	156	52	70	28.764	5.27	5.92	6.1	0.4	1	1.39
100203660	2	1	46	2	2	2	2	2	2	115	110	106	110.333	78	72	72	74	156	51	63	25.8876	4.51	5.85	5.7	0.55	0.99	1.99
100203661	2		47	2	2	2	2	2	2	108	102	99	103	73	77	73	74.3333	156	58	76	31.2295	5.24	9.52	6	0.97	0.83	1.51
100203662	2	1	59	2	2	2	2	2	2	131	129	129	129.667	76	77	77	76.6667	156	50	71	29.1749	5.7	6.65	6.5	0.85	0.97	2.89
100203667	2	2	66	2	4	2	2	2	2	137	137	129	134.333	68	67	72	69	149	50	72	32.431	6.62	10.66	7	2.3	1.24	2.88
100203669	2	2	62	2	4	2	2	2	2	145	137	128	136.667	92	92	93	92.3333	160	64	80	31.25	5.21	7.23	6	1.41	0.66	1.49
100203670	2	2	48	2	3	2	2	2	2	148	153	142	147.667	84	85	81	83.3333	158	68	84	33.6485	4.57	8.43	5.9	1.31	0.86	1.61
100203672	2	1	72	2	2	2	2	2	2	146	128	128	134	68	64	65	65.6667	148	38	52	23.74	6.06	7.73	5.9	0.49	0.97	1.39
100203675	2	1	47	2	3	2	2	2	2	122	132	120	124.667	89	86	87	87.3333	158	50	62	24.8358	4.88	7.13	6.1	1.27	1.1	1.57
100203678	2	1	56	1	3	1	2	2	2	151	154	149	151.333	77	77	72	75.3333	150	57.4	80	35.5556	8.58	16.04	6.8	7.26	0.72	1.59
100203680	2	2	46	2	5	2	2	2	1	109	107	104	106.667	66	67	71	68	156	57	72	29.5858	4.62	7.82	6.1	1.31	0.93	1.81
100203685	2	1	61	1	3	2	2	2	1	148	147	141	145.333	96	96	89	93.6667	155	72	92	38.2934	8.01	15.31	7.1	2.45	0.8	1.14
100203686	2	1	61	2	2	2	2	2	2	138	140	139	139	88	86	82	85.3333	158	66.2	84	33.6485	5.6	11.76	6.2	1.23	0.99	2.75
100203687	2	2	50	2	4	2	2	2	2	103	99	96	99.3333	70	67	65	67.3333	155	48	60	24.974	4.64	6.82	5.8	0.73	0.95	1.59
100203688	2	1	49	2	4	2	2	2	1	111	117	117	115	75	81	82	79.3333	162	56	66	25.1486	5.18	6.14	6.2	0.99	1.04	1.86
100203691	2	1	57	2	3	2	2	2	2	108	104	105	105.667	70	72	73	71.6667	158	67.8	83	33.2479	5.56	8.48	5.5	5.49	1.01	1.69
100203694	2	2	49	2	4	2	2	2	2	115	113	107	111.667	72	75	74	73.6667	155	57	62	25.8065	5.51	7.08	5.8	2.74	1.01	2.43
100203695	2	2	42	2	2	2	2	2	2	128	114	110	117.333	83	74	82	79.6667	156	90	78	32.0513	5.13	8.94	5.7	1.13	1.14	1.7
100203696	2	1	48	2	4	2	2	2	1	109	113	108	110	77	68	70	71.6667	158	60	74	29.6427	5.3	5.49	5.8	0.66	0.96	1.99
100203698	2	2	43	2	5	2	2	2	2	104	121	103	109.333	72	75	73	73.3333	153	48	66	28.1943	4.56	5.15	6.1	0.62	0.58	0.88
100203699	2	2	43	2	1	2	2	2		104	102	105	103.667	75	71	73	73	156	57.2	72	29.5858	4.62	5.92	5.6	1.23	0.93	1.93
100203700	2	2	45	2	1	2	2	2	2	90	94	94	92.6667	54	64	62	60	155	59	78	32.4662	5.64	6.35	6.5	0.97	1.07	2.49
100203702	2	2	51	2	3	2	2	2	1	108	111	91	103.333	70	72	70	70.6667	170	65	70	24.2215	6.41	7.06	6.2	1.57	1.31	3.31
100203710	2	1	56	2	3	2	2	2	2	129	127	130	128.667	82	82	79	81	160	64.5	72	28.125	5.91	7.91	6.3	1.07	1.32	2.32
100203716	2	2	43	2	2	2	2	2	2	113	113	103	109.667	72	72	73	72.3333	159	64	84	33.2265	5.61	6.65	5.8	1.35	1.2	1.62
100203718	2	2	58	2	4	2	2	2	1	109	95	98	100.667	68	68	67	67.6667	158	40	51	20.4294	4.66	5.58	5.7	1.08	1.9	2.66
100203719	2	2	45	2	5	1	1	1	2	139	146	128	137.667	95	89	91	91.6667	163	72	84	31.6158	5.04	8.23	6.1	6.64	0.86	2.16
100203729	2	2	48	2	4	2	2	2	2	124	108	110	114	83	84	82	83	156	60	74	30.4076	4.77	4.89	5.8	1.6	0.89	2.56
100203730	2	2	48	2	3	2	2	2	2	102	105	84	97	65	64	59	62.6667	156	65	86	35.3386	5.4	6.71	5.3	0.76	0.97	1.87
100203738	2	1	53	2	4	2	2	2	1	104	112	102	106	76	73	70	73	150	45	57	25.3333	5.6	8.26	6.3	0.9	1.16	1.82
100203739	2	1	55	2	4	2	2	2	1	138	138	122	132.667	88	88	88	88	162	57	69.2	26.3679	5.71	6.64	5.6	0.85	0.89	1.61
100203740	2	2	57	2	3	2	2	2	2	103	108	112	107.667	80	78	74	77.3333	155	52	68.2	28.3871	5.56	9.5	6	2.39	1.34	3.48
100203744	2	2	54	2	1	2	2	2	2	114	115	104	111	69	70	70	69.6667	153	47	74	31.6118	4.91	6.76	6.1	1.05	0.56	1.37
100203751	2	2	44	2	3				2	138	135	122	131.667	81	80	77	79.3333	158	57	80	32.0461	4.84	6.95	6	0.5	0.85	1.24
100203757	2	2	49	2	4	2	2	2	1	108	108	104	106.667	75	77	78	76.6667	164	64	84	31.2314	4.66	9.39	5.9	0.9	0.72	1.47
100203761	2	2	50	2	3	2	2	2	2	138	134	132	134.667	82	80	78	80	155	54	74	30.8012	4.76	4.97	6.1	0.83	0.92	2.05
100203762	2	1	48	2	1	2	2	2	2	133	121	118	124	86	99	87	90.6667	160	62	74	28.9062	5.32	6.84	6	3.39	0.81	1.9
100203763	2	2	40	2	3	2	2	2	2	110	107	110	109	80	80	74	78	161	51	72	27.7767	4.27	5.6	5.3	0.52	0.73	1.32
100203764	2	1	46	2	3	2	2	2	2	132	136	123	130.333	88	79	81	82.6667	156	58	72	29.5858	5.16	4.86	5.9	0.83	1.05	2.34
100203765	2	1	48	2	1	2	2	2	2	125	108	108	113.667	76	74	77	75.6667	156	71	90	36.9822	4.67	7.02	5.4	0.98	0.57	1.16
100203766	2	2	47	2	4	2	2	2	1	134	133	133	133.333	91	91	87	89.6667	158	62	82	32.8473	5.21	5.97	5.6	4.12	1.04	2.93
100203770	2		75	2	1				2	143	139	124	135.333	70	66	63	66.3333	152	68	98	42.4169	5.82	12.03	6.5	1.36	0.92	2.06
100203773	2	2	40	2	4	2	2	2	2	108	103	110	107	72	72	74	72.6667	163	66	92	34.6268	5.2	6.46	5.7	0.71	0.88	1.59
100203777	2	1	46	2	1	2	2	2	2	130	130	125	128.333	91	89	92	90.6667	156	51	74	30.4076	5.37	8.75	6	10.88	0.95	2.42
100203778	2	1	50	2	1	2	2	2	2	101	97	85	94.3333	67	70	66	67.6667	155	45	58	24.1415	5.13	6.16	5.9	0.69	0.88	2
100203781	2	1	49	2	1	2	2	2	2	118	119	119	118.667	81	86	78	81.6667	157	67	83	33.6728	5.16	9.71	6.5	1.57	1.07	3.72
100203782	2		62	2	5	2	2	2	1	129	122	127	126	77	78	80	78.3333	152	54.5	79	34.1932	7.58	17.07	9.1	0.98	0.96	2.39
100203784	2	2	64	2	5	2	2	2	1	114	99	105	106	77	65	69	70.3333	159.1	57.5	83.1	32.8292	4.7	5.86	6.1	0.6	1.02	2.32
100203790	2	1	47	2	2	2	2	2	2	180	160	158	166	108	100	100	102.667	150	64	98	43.5556	5.18	9.11	5.4	0.87	1.13	2.32
100203792	2	1	48	2	3	2	2	2	2	120	128	118	122	70	74	70	71.3333	160	67	90	35.1562	5.8	8.51	6	1.41	1.07	2.25
100203801	2		78	2	3	2	2	2	2	132	130	129	130.333	87	79	78	81.3333	155	62	87	36.2123	5.49		6.5	1.3	0.5	2.27
100203808	2	1	62	2	2	2	2	2	2	120	120	114	118	75	74	70	73	155	45	72	29.9688	5.17	8.3	6.2	0.39	0.87	1.54
100203811	2	2	59	2	1	2	2	2	2	118	120	114	117.333	74	70	68	70.6667	152	53	83	35.9245	5.22	7.16	5.8	0.56	0.67	1.35
100203812	2	1	71	2	1	2	2	2	2	118	120	124	120.667	74	70	72	72	150	55	82	36.4444	5.45	8.36	6.3	0.73	0.43	1.55
100203820	2	2	44	2	2	2	2	2	2	125	122	120	122.333	75	72	75	74	150	60	83	36.8889	4.38	6.39	5.6	0.56	0.61	0.87
100203824	2	2	49	2	1	2	2	2	2	126	122	120	122.667	68	64	60	64	161.4	65.6	80.3	30.8254	5.02	7.43	6.4	0.53	0.4	0.73
100203825	2	1	67	2	1	2	2	2	2	104	110	112	108.667	78	74	72	74.6667	142	38	67	33.2275	4.94	8.62	6.3	0.44	0.93	1.31
100203831	2	2	69	2	2	2	2	1	2	128	120	120	122.667	72	70	70	70.6667	162	75	113	43.0575	5.64	7.99	5.5	0.58	0.47	1.09
100203832	2	1	65	2	1				2	122	120	120	120.667	84	78	84	82	153	36	93	39.7283	6.13	8.19	6.7	0.96	0.74	1.82
100203833	2	1	56	2	1	2	2	2	2	122	123		122.5	70	70		70	144	54	86	41.4738	7.49	18.1	8	0.71	1.34	2.57
100203844	2	1	64	2	4	2	2	2	2	130	128	126	128	80	78	76	78	147	67	88	40.7238	7.31	12.9	7	1.82	0.72	3.26
100203848	2	2	46	2	3	2	2	2	2	110	102	102	104.667	62	62	62	62	145	52	78	37.0987	4.76	7.16	5.8	0.79	1	2.48
100203852	2	2	66	2	4				2	110	115		112.5	80	80		80	156	50	73	29.9967	5.05	5.74	6.3	0.55	0.58	1.62
100203853	2	2	65	2	2	1	2	2	2	130	132		131	80	80		80	151	58	105	46.0506	5.22	6.28	6.4	1.65	0.83	2.3
100203854	2		84	1	1	2	2	2	2	157	153	151	153.667		80	83	81.5	133.5	58.2	101.6	57.0074	5.64	13.84	6.5	1.18	0.51	1.38
100203855	2	1	46	2	3	2	2	2	2	110	112	112	111.333	70	70	70	70	158	62.5	83	33.2479	5.96	12.41	6.3	2	0.94	1.96
100203857	2	1	60	2	3	2	2	2	2	120	118	120	119.333	78	76	78	77.3333	155.6	51.5	86.4	35.6857	5.43	9.81	6.8	1.37	0.64	1.28
100203861	2	1	57	2		2	2	2	2	113	113	109	111.667	65	61	63	63	154.6	46.5	75.6	31.6303	4.89	6.75	5.3	0.9	0.78	2.05
100203867	2	1	49	2	3	2	2	2	2	102	100	100	100.667	60	60	62	60.6667	164.2	52.5	80.5	29.8572	5.3	6.57	6.3	0.41	0.98	1.92
100203872	2	2	48	2	4	2	2	2	1	160	133	144	145.667	79	76	77	77.3333	154.6	51.5	70.4	29.4546	4.9	5.92	5.7	0.59	1.05	1.97
100203873	2	1	53	2						100	100	100	100	68	68	70	68.6667	150.5	53.2	71.7	31.6553	5.01	11.59	6.6	0.93	1.3	2.42
100203875	2	1	62	2	1	2	2	2	2	150	142	142	144.667	84	80	80	81.3333	156	49	82	33.6949	5	6.21	6	1.36	0.75	2.3
100203877	2	1	52	2	3	2	2	2	2	135	135		135	77	83	80	80	162.5	70.5	99.2	37.5669	5.81	12.24	7.6	0.69	0.65	1.14
100203878	2	2	55	2	4	2	2	2	2	110	108	108	108.667	70	68	68	68.6667	158.6	55.5	76.5	30.4127	4.48	5.93	6.4	0.31	1.14	1.36
100203879	2	1	58	2	3	2	2	2	2	146	147	135	142.667	80	81	89	83.3333	154.6	53.5	76.2	31.8813	6.48	8.75	6.6	8.94	0.98	2.63
100203885	2	2	58	1	3	2	2	2	2	110	126	110	115.333	76	75	75	75.3333	159.2	57.5	82.6	32.5907	6.12	13.62	5.6	1.54	1.05	2.13
100203887	2	1	56	2	3	2	2	2	2	115	102	106	107.667	69	71	68	69.3333	155.2	50.4	72.6	30.1407	5.88	8.84	6	0.63	0.53	1.47
100203890	2	2	51	2	4	2	2	2	2	138	125	124	129	90	89		89.5	151.6	42.5	62.6	27.238	5.5	5.67	5.7	0.37	0.69	1.14
100203892	2	2	57	2	3	1	2	2	2	138	138	136	137.333	89	88	85	87.3333	156.4	73.5	91.5	37.4065	7.85	14.15	7.4	1.14	0.61	2.08
100203894	2	1	53	2	4	2	2	2	2	100	102	100	100.667	60	60	60	60	158.2	54.5	79.2	31.6455	4.69	6.14	5.8	0.83	1.18	1.72
100203895	2	2	55	2	3	2	2	2	2	140	136	136	137.333	78	76	76	76.6667	154.5	44.5	62.6	26.2251	5.03	6.65	6.2	0.6	1.3	2.3
100203897	2	1	46	2	5	2	2	2	2	110	108	108	108.667	70	70	70	70	150.5	46.2	67.2	29.6685	4.88	7.14	5.5	0.6	0.87	1.47
100203902	2	2	55	2	4	2	2	2	2	108	108	108	108	68	68	66	67.3333	162.3	57.5	65.2	24.752	5.21	7.78	6.5	1.06	1.54	3.66
100203909	2	1	56	2	3	2	2	2	2	88	88	88	88	62	62	62	62	156.8	49.5	67.5	27.4544	4.75	6.21	6.3	0.67	1.27	2.73
100203910	2	1	49	2	3	2	2	2	2	140	140	140	140	90	90	90	90	151.6	63.4	92.7	40.3349	7.55	18.41	7.3	1.52	1.33	2.91
100203916	2	2	49	2	3	1	2	2	2	142	140	142	141.333	92	90	92	91.3333	165.5	63.5	79.6	29.0614	4.89	5.5	5.7	2.35	1.07	2.89
100203917	2	1	47	2	3	2	2	2	2	106	108	106	106.667	68	68	68	68	155.6	57.5	85.2	35.1901	5.13	8.59	5.8	2.2	0.89	2.16
100203919	2	2	52	2	3	2	2	2	2	108	106	99	104.333	74	75	69	72.6667	156.4	58.5	75.2	30.7429	4.94	6.75	5.8	0.99	1.41	2.85
100203922	2	1	54	2	5	1	2	2	2	116	114	117	115.667	81	81	76	79.3333	155.1	67.5	93.1	38.7013	6.07	10.05	6.8	2.34	1.55	2.66
100203923	2	1	56	2	3	2	2	2	2	143	139	136	139.333	89	81	78	82.6667	155.5	70.4	92.5	38.2544	4.71	8.55	6.7	6.26	1.24	2.82
100203924	2	1	47	2	4	2	2	2	2	92	94	94	93.3333	62	62	60	61.3333	154.5	55.6	72.8	30.4982	4.78	5.87	6.2	2.63	1.02	2.91
100203927	2	1	43	2	4	2	2	2	2	113	122	115	116.667	84	86	83	84.3333	160.4	56.5	78.2	30.3947	5.47	7.43	6	1.44	1.31	2.85
100203928	2	1	49	1		2	2	2		102	102	102	102	70	70	70	70	167	46	66	23.6652	5.83	6.27	7.3	0.87	1.72	2.27
100203932	2	2	49	2	3	2	2	2	2	118	118	118	118	80	80	80	80	154.1	55.2	88.2	37.1418	4.88	7.05	5.8	2	1.79	3.59
100203935	2	1	48	2	3	2	2	2	2	108	108	108	108	68	68	68	68	162.5	54.6	72.6	27.4935	4.56	6.91	6	0.48	1.44	2.4
100203938	2	2	42	2	3	2	2	2	2	109	109	112	110	80	76	74	76.6667	159.6	51.1	72.8	28.5802	5.06	7.81	5.6	0.73	1.35	2.17
100203943	2	1	49	2	4	2	2	2	2	152	152	152	152	90	92	90	90.6667	144.5	43.5	74.6	35.7275	4.43	8.47	5.6	0.72	0.64	1.44
100203944	2	2	48	2	1	2	2	2	2	100	100	100	100	62	62	62	62	154	52	83	34.9975	5.31	7.03	6.3	0.54	0.96	1.51
100203945	2	1	47	2	5	2	2	2	1	117	127	119	121	82	82	81	81.6667	153.1	66.5	94.1	40.1457	8.69	16.81	6.7	1.4	0.76	2
100203949	2	2	58	2	2	1	2	2	1	150	150	150	150	90	90	90	90	145.6	55.4	87.2	41.1333	5.03	9.37	5.8	1.71	0.71	3.35
100203950	2	2	59	2	2	2	2	2	2	137	145	111	131	91	90	87	89.3333	149.3	68.2	102.4	45.9389	5.45	8.02	6.5	0.42	0.55	0.9
100203952	2	2	65	1	4			2	1	95	90	91	92	75	70	72	72.3333	150.1	47.5	77.2	34.2654	10.25	21.72	7.6	0.76	1.28	2.24
100203953	2	2	58	1	2	1	2	2	2	157	152	148	152.333	88	64	61	71	159.2	58.2	89.2	35.1948	8.29	16.25	6.5	0.79	1.35	2.04
100203956	2	1	42	2	2	2	2	2	2	125	126	100	117	75	80	76	77	158.1	54.1	76	30.4053	5.08	5.12	5.7	0.65	0.93	1.17
100203957	2	2	56	2	4	2	2	2	2	130	128	125	127.667	80	81	82	81	158.5	84.1	61.2	24.3609	6.06	4.52	6.3	0.71	1.62	2.23
100203958	2	2	48	2	2	1	2	1	2	146	127	128	133.667	79	71	67	72.3333	155.1	60.1	89.1	37.0386	5.03	9.25	6.4	1.37	1	1.91
100203960	2	2	60	2	1	2	2	2	2	125	119	110	118	82	79	78	79.6667	147.1	55.1	78.2	36.1394	5.51	5.9	5.9	1.24	0.88	2.26
100203961	2	2	50	2	3	2	2	2	2	120	122	120	120.667	85	80	85	83.3333	149.1	50.1	87.1	39.1799	5.58	6.72	7.8	1.09	1.87	2.98
100203964	2	1	47	2	1	2	2	2	2	125	120	122	122.333	80	82	79	80.3333	152	64	96	41.5512	6.78	17.36	8.3	1.68	0.97	2.31
100203970	2	1	60	2	3	2	2	2	2	133	143	141	139	87	82	78	82.3333	155.1	57.1	91.1	37.87	7.76	16.29	8.1	5.39	1.15	1.98
100203972	2	2	63	2	2	2	2	2	2	102	110	105	105.667	66	65	61	64	151	58.5	84.1	36.8843	5.32	9.77	5.5	5.79	0.79	1.58
100203977	2	2	56	1	3	2	2	2	1	113	107	105	108.333	71	64	64	66.3333	153.5	53.1	79.1	33.5706	5.82	9.12	6.5	1.27	1.17	1.71
100203978	2	1	47	2	2	2	2	2	2	108	110	108	108.667	78	80	76	78	155	46	70	29.1363	5.83	6.61	6	0.63	1.61	2.26
100203982	2	1	63	1	4	2	2	2	1	102	102	102	102	70	70	70	70	167.2	46.5	66.4	23.7517	7.08		6.6	0.74	1.98	2.85
100203983	2	2	57	2	3	2	1	2	1	105	111	105	107	78	76	75	76.3333	155.1	58.1	81.2	33.7546	5.13	9.69	6	1.35	1.37	4.29
100203984	2	1	59	2	3	1	2	2	2	153			153	87			87	165.1	80.1	104.2	38.2273	6.04	9.18	5.8	2.09	1.18	3.32
100203990	2	1	56	2	2	1	2	2	2	130	141	131	134	81	83	98	87.3333	158	66	84.1	33.6885	5.34	6.71	6.2	1.98	1.85	4.83
100203991	2	1	53	2	4	2	2	2	2	117	123	120	120	75	73	74	74	156	49.1	78	32.0513	5.27	6.17	6	1.28	1.64	3.45
100203992	2	2	58	2	3	1	2	2	2	132	136	138	135.333	88	85	79	84	157	63.1	83.1	33.7133	5.31	6.2	6	1.56	1.27	2.49
100203995	2	1	48	2	4	2	2	2	2	105	102	103	103.333	78	79	77	78	155.1	53.5	76.1	31.6345	5.43	6.58	6	1.14	1.69	2.93
100203999	2	2	54	2						110	112	113	111.667	70	75	72	72.3333	162.1	57.5	82.1	31.2448	5.43	8.44	5.7	0.96	1.87	2.77
100204000	2	2	60	2	3	2	2	2	2	100	98	103	100.333	76	70	72	72.6667	150.1	48.1	79.1	35.1087	5.01	7.12	6	1.22	1.46	2.7
100204007	2	2	51	2	4	2	2	2	1	141	132	139	137.333	87	87	78	84	157.1	50.1	76.1	30.8342	6.33	13.4	6.7	4.04	1.14	3.16
100204009	2	1	61	2	2	2	2	2	2	103	109	95	102.333	61	57	58	58.6667	147.1	51	79.1	36.5554	5.75	8.35	6.6	0.94	1.35	2.09
100204012	2	1	58	1	4	2	2	2	2	135	141	138	138	86	83	86	85	157.2	56.5	78.1	31.6043	8.78	12.97	7.9	6.48	1.26	2.62
100204013	2	1	52	2	3	2	2	2	2	113	107	115	111.667	70	69	66	68.3333	155.1	60.1	81	33.6714	5.36	5.48	5.9	1.32	1.3	3.26
100204014	2	1	58	2	2				2	118	117	116	117	58	56	57	57	156	55.5	82.1	33.736	5.73	6.11	6.2	1.03	1.19	2.46
100204020	2	2	57	2	3					118	125	120	121	77	76	78	77	147.1	37.2	48.1	22.229	5.2	7.87	5.4	1.18	0.9	1.71
100204023	2	1	64	2	3	2	2	2	1	125	130	131	128.667	80	81	82	81	149.5	51.4	73.5	32.8855	5.11	7.05	5.8	1.68	1.04	3.26
100204030	2	1	52	2	3	2	2	2	2	120	114	117	117	70	79	70	73	155.1	66.1	98.1	40.7798	5.82	7.49	6	7.53	0.98	2.04
100204037	2	1	55	2	3	2	2	2	2	98	97	92	95.6667	63	62	60	61.6667	163.1	56.5	79.2	29.7726	6.9	8.23	7.1	0.64	1.32	1.82
100204039	2	2	48	2	3	2	2	2	1	122	105	100	109	85	78	75	79.3333	146.1	50.2	77.2	36.1674	5.59	10.54	6.1	3.26	0.94	2.11
100204040	2	2	43	2	3				1	122	121	120	121	80	77	78	78.3333	155.1	49.1	72	29.9302	5.57	8.92	6.2	0.64	1.47	2.11
100204043	2	1	52	2	3	1	2	2	2	197	198	190	195	79	89	89	85.6667	154.1	63.6	83.1	34.9942	5.09	6.27	5.8	0.89	1.91	2.78
100204052	2	1	70	2	1				2	140	133	132	135	79	77	78	78	157.5	53	84.1	33.9027	4.78	4.58	5.8	2.71	1.26	3.03
100204057	2	1	52	2	4	2	2	2	2	108	105	106	106.333	61	62	60	61	156.1	64.6	84.1	34.5136	5.13	5.7	5.7	1.22	0.92	2.21
100204058	2	1	54	2	3	2	2	2	2	117	118	116	117	71	67	70	69.3333	153.1	52.1	74.1	31.6132	5.11	3.56	6.2	0.58	1.2	2.1
100204059	2	1	55	2	4	2	2	2	1	129	123	124	125.333	81	80	80	80.3333	166.1	59.1	89.1	32.2952	5.56	7.15	6.1	1.19	1.12	2.31
100204062	2	2	57	2	3	2	2	2	2	148	144	152	148	89	83	81	84.3333	151.1	51.2	79.1	34.6456	5.64	10.87	5.8	1.38	1.39	2.98
100204064	2	2	57	2	3	2	2	2	2	122	116	118	118.667	76	75	76	75.6667	163.1	61.1	83.2	31.2763	6.22	8.75	5.6	2.66	1.25	2.33
100204065	2	1	57	2	3	1	2	2	1	127	127	127	127	84	85	83	84	154.1	61.5	87.1	36.6786	4.65	7.79	6	0.96	2.22	3.01
100204067	2	1	43	2	2	2	2	2	2	111	98	100	103	67	63	62	64	158	56	82	32.8473	4.84	5.35	5.9	0.5	1.36	1.74
100204068	2	2	43	2	3	2	2	2	2	127	111	117	118.333	62	65	64	63.6667	150.1	84.1	70.1	31.1141	5.22	6.27	5.5	0.48	1.65	1.28
100204069	2	2	55	2	1	2	2	2	2	118	113	115	115.333	62	65	64	63.6667	160.1	52.6	83.1	32.4204	6.45	11.37	6.1	2.44	1.1	3.12
100204070	2	1	56	2	3	2	2	2	2	114	113	112	113	62	63	64	63	155.1	63.1	97.1	40.3641	5.97	7.42	6.4	1.66	0.61	2.06
100204073	2	1	60	2	2	2	2	2	2	148	151	149	149.333	83	86	82	83.6667	154.1	71.1	105.1	44.2586	6.08	14.15	6.7	2.13	1.3	3.75
100204080	2	2	41	1	3	2	2	2	1	131	127	120	126	92	88	88	89.3333	160.1	60.1	88.1	34.3711	6.19	11.13	6.7	1.11	1.36	2.6
100204082	2	1	40	2	2	2	2	2	2	107	109	108	108	69	68	68	68.3333	149.1	49.1	75.1	33.7819	5.11	6.33	5.6	0.95	1.76	3.47
100204083	2	1	47	2	3	2	2	2	2	113	113	110	112	78	77	76	77	147.1	85.1	67.1	31.0097	4.75	8.86	6	0.76	1.45	4.13
100204084	2	2	62	2	3	1	2	2	2	110	118	120	116	69	68	68	68.3333	150.1	56.1	93.1	41.3227	5.31	5.71	6.2	1.12	1.41	2.8
100204085	2	1	54	2	2	1		2	2	138	140	135	137.667	98	97	95	96.6667	154.1	56.1	79.1	33.3097	4.98	6.4	6	1.42	1.6	3.44
100204088	2	2	61	2	3	2	2	2	2	129	117	118	121.333	78	70	70	72.6667	155	62.5	89	37.0447	4.37	7.11	5.9	1.8	1.19	2.92
100204089	2	1	53	2	4	2	2	2	1	100	111	110	107	72	77	78	75.6667	147.5	53.1	78.1	35.8977	5.35	7.17	6.1	1.5	0.97	3.16
100204093	2	2	55	2	3	2	2	2	2	123	127	125	125	69	67	66	67.3333	155.1	70.5	90.1	37.4543	4.86	8.58	6.2	1.72	0.97	1.96
100204094	2	1	57	2						98	95	97	96.6667	61	59	56	58.6667	161.2	56.2	76.3	29.3626	4.89	6.95	6.1	2.19	1.1	3.33
100204095	2	2	44	2	3	2	2	2	2	130	113	121	121.333	82	83	78	81	155.1	45.1	71.1	29.556	4.48	5.45	5.6	0.97	1.67	1.73
100204097	2	2	40	2	3	2	2	2	2	105	102	99	102	73	86	78	79	165.1	66.1	87.1	31.9539	5.37	6.1	5.3	1.21	0.86	1.72
100204099	2	2	49	2					2	85	87	87	86.3333	54	54	53	53.6667	157.1	46.1	73.1	29.6186	4.83	4.61	5.5	0.81	1.24	1.82
100204100	2	2	54	2	3	2	2	2	2	142	127	127	132	76	77	75	76	158.1	63.1	104.1	41.6473	5.16	6.27	6.4	1.5	1.32	3.39
100204102	2	2	58	2	3	2	2	2	2	126	102	121	116.333	75	68	65	69.3333	156.1	66.6	90.1	36.9759	5.24	7.35	6.3	1.84	1.06	2.4
100204104	2	1	54	1	3	1		2	2	186	156	159	167	108	108	106	107.333	165.1	65.5	92.1	33.7882	10.07	15.91	8.4	1.41	0.99	2.08
100204111	2	1	61	2	2	2	2	2	2	145	152	154	150.333	88	88	83	86.3333	161.2	47.1	74.2	28.5545	5.62	5.88	5.9	0.92	1.97	2.82
100204114	2	1	53	2	4	2	2	2	2	114	124	108	115.333	80	74	73	75.6667	152.1	44.2	68.3	29.5231	4.86	5.48	5.7	1.1	1.86	3.11
100204115	2	1	70	2	1	1	2	2	2	132	131	132	131.667	74	75	74	74.3333	157.1	51.2	92.1	37.317	5.76	9.37	6	1.17	1.51	3.38
100204119	2	1	56	2	3	2	2	2	2	100	102	102	101.333	71	70	70	70.3333	154.2	43.2	66.1	27.7992	5.5	5.63	5.4	1.82	1.32	3.18
100204122	2		64	2						140	136	127	134.333	88	86	81	85	155.2	69.5	102.2	42.4295	4.83	10.21	6	1.74	1.57	3.4
100204126	2	2	44	2	4	2	2	2	2	118	121	120	119.667	79	80	80	79.6667	163.2	63.5	88.3	33.1528	5.22	6.97	6.1	0.86	1.53	2.34
100204127	2	2	52	2	3	2	2	2	2	126	124	116	122	81	81	80	80.6667	154.1	50.5	72.2	30.4041	5.95	7.05	5.7	1.22	1.5	2.74
100204128	2	1	52	2	4	2	2	2	2	131	123	131	128.333	79	84	81	81.3333	162.1	57.2	85.2	32.4245	5.14	14.52	6.3	2.27	1.03	2.79
100204129	2		61	1	1	2	2	2	2	109	115	114	112.667	64	68	68	66.6667	150.2	51.2	75.3	33.3776	6.49	13.71	8.7	1.91	1.25	3.17
100204130	2	1	57	2	2	2	2	2	2	126	119	120	121.667	82	81	82	81.6667	152.1	54.1	75.1	32.4625	5.59	9.58	6.3	0.73	1.13	2.88
100204132	2	2	60	2	3	2	2	2	1	112	103	106	107	71	66	68	68.3333	151.2	35.5	60.1	26.2888	5.14	6.18	5.5	0.83	1.34	1.23
100204136	2	2	52	2	4	2	2	2	2	120	111	112	114.333	74	72	72	72.6667	158.1	55.2	83.5	33.4059	6.14	9.1	6	4.19	1.11	2.6
100204139	2	2	60	2	3	2	2	2	2	115	115	116	115.333	85	78	80	81	155.1	50.2	75.2	31.2604	5.75	11.16	6.5	1.23	1.12	2.62
100204140	2	1	41	2	3	2	2	2	2	104	95	98	99	78	78	78	78	154.2	50.5	76.1	32.0049	5.18	7.18	5.6	0.79	0.87	1.54
100204141	2	1	53	2	3	2	2	2	2	101	109	104	104.667	61	67	66	64.6667	151.1	60.2	85.2	37.3173	5.17	7.65	5.8	0.7	1.08	1.5
100204143	2	1	46	2	3	2	2	2	2	100	96	96	97.3333	78	78	73	76.3333	157.2	50.3	75.1	30.3903	5.48	7.38	6	0.67	0.83	1.72
100204152	2	1	60	2	3	2	2	2	2	133	126	128	129	71	72	70	71	154.4	56.5	84.3	35.3617	5.73	8.78	6.1	1.56	1.05	2.83
100204153	2	2	45	2	3	2	2	2	2	128	128	126	127.333	92	88	88	89.3333	156.2	65.2	83.2	34.1005	5.11	7.03	5.2	0.92	0.98	2
100204154	2	1	41	2	2	2	2	2	2	137	129	130	132	80	81	80	80.3333	153.2	62.5	89.3	38.0482	5.93	11.4	5.9	1.48	1	2.26
100204158	2	1	56	2	3	2	2	2	2	122	118	120	120	67	63	64	64.6667	159.2	60.5	95.3	37.6016	5.2	10.42	6.4	0.92	1.52	3.27
100204160	2	2	57	2	3	1	2	2	2	152	150	146	149.333	92	94	91	92.3333	158.2	56.5	83.1	33.2038	5.07	9.17	6.2	1.18	1.46	3.43
100204162	2	1	48	2	3	2	2	2	2	119	112	114	115	74	66	68	69.3333	155.2	54.2	83.1	34.4999	7.08	8.69	6.1	2.09	1.24	2.92
100204165	2	2	52	2	4	2	2	2	1	99	103	104	102	71	66	68	68.3333	152.1	69.2	102.1	44.1334	6.55	8.32	6.8	5.83	0.79	2.75
100204170	2	1	54	2	4	2	2	2	2	98	90	98	95.3333	68	67	68	67.6667	155.3	60.2	91.2	37.8139	5.92	13.17	6.7	1.45	1.58	4.27
100204172	2	2	48	1	2	2	2	2	2	114	121	120	118.333	74	72	74	73.3333	161.2	58.5	86.3	33.2109	8.96	13.64	6.7	2.52	1.35	2.98
100204177	2	1	53	2	3	2	2	2	2	110	128	117	118.333	73	110	74	85.6667	151.2	52.4	87.3	38.1866	5.86	12.14	5.9	5.43	0.81	1.86
100204180	2	1	51	2	3	2	2	2	1	122	123	124	123	71	74	72	72.3333	162.3	52.3	82.1	31.1678	6.48	8.42	6	1.05	1.31	3.02
100204186	2	2	47	2	3	2	2	2	1	121	106	110	112.333	71	69	68	69.3333	162.3	62.5	71.3	27.0678	5.17	5.28	6.1	0.51	1.45	1.59
100204187	2	2	52	2	4	2	2	2	1	111	115	115	113.667	76	77	76	76.3333	157.2	60.5	85.3	34.5179	4.54	5.39	5.7	1.98	0.94	2.46
100204189	2	1	49	2	3	2	2	2	1	96	102	102	100	73	62	64	66.3333	155.2	50.5	76.3	31.6768	5.79	6.75	6.1	0.46	1.26	1.81
100204191	2	2	44	2	3	2	2	2	2	96	112	110	106	76	69	69	71.3333	162.3	48.2	70.2	26.6502	5.09	5.57	5.8	0.85	1.99	3.66
100204192	2	2	46	2	4	2	2	2	2	90	94	94	92.6667	65	63	62	63.3333	160.3	51.2	69.2	26.9302	5.14	6.6	5.8	1.43	1.13	2.87
100204200	2	1	41	2	2	2	2	2	2	113	122	120	118.333	78	72	76	75.3333	153.5	46.5	74.3	31.5335	5.16	6.15	5.3	1.08	1.29	2.41
100204204	2	1	59	2	4	1			2	127	122	124	124.333	73	69	72	71.3333	145.2	50.5	82.3	39.0361	5.4	7.69	5.9	1.61	1.21	3.29
100204205	2	1	51	2	4	2	2	2	2	111	116	116	114.333	61	60	60	60.3333	154.3	52.3	73.3	30.7873	5	7.5	5.5	1.38	1.09	2.72
100204208	2	2	56	2	3	2	2	2	1	118	113	114	115	75	78	76	76.3333	159.2	58.2	80.3	31.6832	4.96	5.77	5.7	2.48	1.14	2.84
100204209	2	2	54	2	4	2	2	2	2	117	109	123	116.333	73	77	76	75.3333	149.1	50.5	80.2	36.0761	5.14	5.85	6.3	0.52	0.9	1.83
100204216	2	2	60	2	3	2	2	2	2	124	116	118	119.333	62	56	60	59.3333	150.3	48.2	78.3	34.6612	4.61	5.49	6.2	1.72	1.11	1.67
100204220	2	2	56	2	3	2	2	2	2	139	149	141	143	92	90	91	91	157.5	66.2	90.2	36.3618	5.5	8.89	6.2	2.3	0.85	1.45
100204224	2	2	42	2	3	2	2	2		116	117	116	116.333	74	70	72	72	151.5	53.5	72.4	31.5437	5.13	4.99	6.1	1.28	1.35	2.91
100204228	2	1	49	2	2	2	2	2	2	106	109	110	108.333	69	70	64	67.6667	158.3	52.3	72.3	28.852	4.94	8.29	5.8	1.04	1.43	2.38
100204230	2	2	55	1	1	1			2	154	155	149	152.667	76	75	79	76.6667	155.5	76.2	104.3	43.1344	5.85	13.63	6.6	1.54	0.74	1.72
100204231	2	2	49	2	3	2	2	2	2	117	121	120	119.333	85	84	82	83.6667	165.2	55.2	80.3	29.4236	5.4	5.97	6.1	1.59	1.23	3.31
100204233	2	1	51	2	3	2	2	2	2	143	125	126	131.333	88	79	79	82	155.2	49.5	73.3	30.4313	5.72	12.5	6.4	1.16	1.45	2.54
100204238	2	2	56	2	2	2	2	2	2	120	119	120	119.667	75	71	68	71.3333	155.5	52.4	84.3	34.8632	5.22	10.56	6.6	2.89	1.03	2.66
100204239	2	1	61	2	3	1	2	2	1	151	151	151	151	78	76	79	77.6667	149.1	59.2	87.3	39.2698	5.62	13.93	6.1	4.92	1.02	3.38
100204240	2	2	49	2	3	2	2	2	1	138	121	130	129.667	73	70	75	72.6667	153.5	56.1	88.5	37.5601	4.6	7.9	5.7	1.32	1.39	4.08
100204242	2	2	55	2	3	2	2	2	2	153	123	150	142	83	91	93	89	168.2	76.5	94.2	33.2965	6.27	9.63	6.4	2.77	0.8	2.11
100204243	2	1	58	1	2	2	2	2	2	123	126	124	124.333	84	78	84	82	167.5	56.3	78.3	27.9082	5.06	6.48	5.9	0.93	1.56	2.55
100204244	2	2	58	2	2	2	2	2	2	124	120	120	121.333	83	82	78	81	162.4	58.5	88.4	33.5182	5.81	10.11	6.2	3.18	1.14	3.3
100204245	2	1	56	2	3	2	2	2	2	153	148	145	148.667	87	88	87	87.3333	149.2	57.1	89.2	40.0707	5.3	14.05	6.2	1.71	1.34	4
100204248	2	1	56	2	3	2	2	2	2	130	133	136	133	75	74	73	74	162.5	68.7	87.2	33.0225	5.31	8.35	5.5	0.89	1.01	1.83
100204249	2	1	45	2	3	2	2	2	2	89	91	94	91.3333	60	61	62	61	152.5	51.5	73.4	31.5614	4.88	5.77	5.6	1.15	1.31	1.87
100204250	2	2	53	2	4	2	2	2	2	117	108	115	113.333	64	71	75	70	159.3	70.1	102.6	40.4311	5.98	11.98	6.7	1.44	1.07	2.46
100204252	2	1	49	2	2	2	2	2	2	101	102	110	104.333	64	66	67	65.6667	162.5	65.2	91.2	34.5373	5.14	8.61	6.1	1.18	1.25	2.38
100204254	2	2	45	2	3	2	2	2	2	100	102	102	101.333	62	62	62	62	158	69	83	33.2479	5.05	6.96	5.9	1.48	1.27	2.17
100204256	2		71	2	2	1	2	2	2	148	150	146	148	92	96	90	92.6667	162	62	70	26.6728	6.42	15.57	7.3	1.62	1.42	2.74
100204257	2	1	44	2	2	2	2	2	1	118	110	107	111.667	63	62	56	60.3333	165.2	62.3	81.3	29.79	5.52	8.4	5.7	0.57	1.2	1.72
100204258	2	2	47	2	3				2	105	106	105	105.333	68	67	68	67.6667	167.2	64.2	83.4	29.8328	4.72	7.09	5.9	1.5	1.25	2.53
100204262	2	2	47	2	4	2	2	2	1	172	151	152	158.333	95	91	94	93.3333	159.5	51.2	79.2	31.1318	5.34	9.43	5.9	1.51	0.81	2.26
100204264	2	1	54	2	4	1	2	2	1	131	123	120	124.667	79	78	79	78.6667	158.5	67.5	101.3	40.3228	10.75	26.63	8.4	4.51	1.11	3.07
100204265	2	2	58	2	2	2	2	2	2	130	125	131	128.667	88	90	90	89.3333	155.4	54.5	88.7	36.7301	5.18	7.63	5.8	1.74	1	1.98
100204271	2	1	61	1	2	1	2	2	2	160	156	155	157	99	96	94	96.3333	151.5	63.2	99.5	43.3509	8.01	13.98	7.7	1.34	0.97	2.64
100204273	2	2	51	2	3	2	2	2	2	106	98	98	100.667	58	63	60	60.3333	159.6	49.5	71.5	28.0699	5.73	8.93	5.9	0.78	1.32	2.21
100204279	2	1	59	2	3	2	2	2	2	143	149	147	146.333	111	103	96	103.333	155.4	56.5	86.1	35.6534	4.91	6.86	5.6	1.5	1.68	3.47
100204282	2	1	50	1	2	2	2	2	2	110	98	100	102.667	69	65	68	67.3333	151.2	40.5	71.2	31.1441	13.37	20.73	11	3.01	0.97	1.94
100204285	2	1	54	2	3	1	2	2	2	166	149	152	155.667	102	96	103	100.333	160.2	54.5	77.1	30.042	5.03	5.59	6	1.2	1.24	3.19
100204288	2	2	52	1	3	2	2	2	1	150	151	148	149.667	86	86	86	86	154.1	64.5	93.2	39.2474	8.7	11.77	7.9	3.83	1.66	2.7
100204290	2	1	54	1	3	2	2	2	2	104	103	104	103.667	64	64	64	64	156.5	52.5	84.2	34.3782	5.41	14	8.6	0.54	0.75	1.37
100204292	2	1	61	2	3	2	2	2	2	108	96	98	100.667	71	68	65	68	142	48.2	75.2	37.2942	5.21	6.99	6.2	1.04	1.58	2.56
100204293	2	1	64	2	2	2	2	2	2	147	142	136	141.667	71	71	67	69.6667	149	52.5	82.2	37.0254	4.87	7.49	6.4	1.8	1.23	3
100204297	2	2	61	2	2	2	2	2	1	118	117	118	117.667	61	61	61	61	153	54.5	79.3	33.8759	5.33	5.53	6	1.24	1.19	2.4
100204298	2	1	60	2	3				2	118	114	110	114	81	81	73	78.3333	156	60	86.1	35.3797	5.36	5.55	5.9	1.32	1.33	2.21
100204302	2	2	56	2	3	2	2	2	2	101	102	102	101.667	59	62	62	61	154.1	52.6	75.1	31.6253	4.67	6.6	5.4	1.24	0.98	1.59
100204303	2	2	63	2	3				2	126	126	126	126	58	62	60	60	140.2	61.5	95.2	48.4329	5.09	9.64	6.6	2.66	1.14	1.9
100204305	2	1	56	2	2	2	2		2	131	124	123	126	89	84	80	84.3333	157.2	73.5	105.1	42.5302	5.82	10.76	7.1	3.64	0.98	2.68
100204306	2		48	2	2	2	2	2	2	129	135	130	131.333	88	79	84	83.6667	157	53.2	75.2	30.5083	5.97	10.46	5.8	1.36	1.45	2.58
100204308	2	1	54	2	2	2	2	2	2	144	140	132	138.667	89	87	83	86.3333	165.2	73.7	105.1	38.5108	5.7	7.78	7.2	1.27	1.48	3.32
100204309	2	2	54	2	3	2	2	2	2	94	95	96	95	65	65	66	65.3333	155.1	41.2	60.1	24.9834	5.77	6.33	5.5	0.85	1.48	2.83
100204310	2	2	55	2	2	2	2	2	1	120	118	116	118	80	78	78	78.6667	165	60	82	30.1194	6.24	9.1	6.3	3.33	1.15	3.82
100204319	2	1	57	2	2	2	2	2	2	109	97	100	102	74	74	67	71.6667	154.5	44.5	77.3	32.3834	4.79	9.21	5.4	1.01	1.83	3.15
100204322	2	2	69	2	3	2	1	2	2	132	134	134	133.333	75	78	76	76.3333	153.2	47.5	76.1	32.424	5.13	6.48	5.9	0.97	1.65	3.11
100204324	2	1	54	2	3	2	2	2	2	118	112	110	113.333	79	76	69	74.6667	160	62	80	31.25	5.17	10	6.3	1.74	1.32	4.14
100204327	2	2	49	2	3	2	2	2	2	132	124	126	127.333	80	77	78	78.3333	161.2	69.1	86.1	33.1339	5.65	7.01	6.2	1.64	1.18	2.48
100204331	2	2	49	2	3	2	2	2	2	119	113	112	114.667	71	72	65	69.3333	154.2	73.5	98.3	41.3414	5.92	9.46	6	2.08	1.43	3.37
100204336	2	2	49	2	3	2	2	2	2	93	94	87	91.3333	59	57	56	57.3333	154	51.5	79.1	33.353	5.04	4.82	5.6	1.08	1.24	3.18
100204340	2	2	48	2	3	2	2	2	2	128	111	118	119	76	73	76	75	160.2	58.2	83.1	32.3799	5.6	5.98	4.8	1.88	1.26	2.23
100204350	2	2	45	2	3	2	2		2	96	91	93	93.3333	58	62	66	62	160.5	50.5	70.1	27.2125	4.66	5.07	5.6	1.03	1.69	2.59
100204352	2	1	56	1	3	2	2	2	2	99	105	106	103.333	70	74	72	72	155.1	49.1	80.1	33.2973	4.73	5.56	5.7	1.75	1.27	2.61
100204353	2	1	43	2	3	2	2	2	2	107	97	100	101.333	75	69	70	71.3333	151	48.2	70.2	30.7881	5.89	7.52	6	0.9	1.43	2.14
100204355	2	2	47	2	3	2	2	2	2	106	104	106	105.333	61	66	66	64.3333	156.5	53.5	81.2	33.1533	4.63	7.73	6.1	1.37	1.32	2.86
100204358	2	1	61	2	3	2	2	2	2	107	101	100	102.667	65	76	74	71.6667	152.5	52	82	35.2593	5.4	7.13	6.2	2.1	1.63	4.48
100204359	2	1	46	2	4	2	2	2	2	108	105	106	106.333	71	65	72	69.3333	160.5	46.2	72.1	27.9889	5.22	9.39	5.9	1.14	1.53	2.48
100204360	2	1	56	1	3	2	2	2	2	121	114	104	113	73	69	69	70.3333	152	45.1	70.1	30.3411	5.03	6.89	6.1	1.2	1.57	3.57
100204367	2	1	55	2	1	2	2	2	2	127	129	128	128	73	73	72	72.6667	148.2	67.9	103.2	46.9876	5.58	13.06	7.3	0.77	2.41	1.99
100204369	2	1	56	2	2	2	2	2	2	112	110	114	112	74	72	74	73.3333	155	44	70	29.1363	5.15	7.26	5.8	0.91	1.32	2.54
100204370	2		48	2	4	2	2	2	2	120	121	120	120.333	70	71	71	70.6667	158	63	75	30.0433	4.86	8.12	6.1	2.39	1.06	2.37
100204371	2	2	42	2	3	2	2	2	2	91	92	90	91	63	65	62	63.3333	151.4	49.2	70.3	30.6693	4.98	5.58	6.1	1.12	1.31	2.66
100204373	2	1	52	2	3	2	2	2	2	127	130	123	126.667	74	82	73	76.3333	149.4	41.7	68.4	30.6447	4.82	6.54	5.8	1.05	1.75	3.44
100204374	2	1	57	2	3	2	2	2	2	106	115	113	111.333	76	78	73	75.6667	155.2	49.2	72.3	30.0161	5.84	7.8	6.4	1.72	1.66	3.59
100204376	2	2	44	2	4	2	2	2	2	109	106	104	106.333	73	73	74	73.3333	156.2	63.2	84.2	34.5104	4.74	6.57	5.4	1.28	1.28	3.1
100204377	2	1	55	2	4				2	145	149	143	145.667	90	103	86	93	162.3	56.1	52.3	19.8548	5.22	7.73	6.5	1.19	1.83	3.2
100204378	2	2	51	2	4	2	2	2	1	129	116	120	121.667	76	71	74	73.6667	153.5	45.2	72.3	30.6847	4.56	5.63	5.7	1.3	1.23	2.61
100204379	2	2	52	2	3	2	2	2	1	105	99	102	102	73	69	71	71	157.3	45.8	74.2	29.9879	4.63	5.64	5.8	1	1.98	2.7
100204381	2	1	53	2	4	2	2	2	1	124	116	120	120	78	79	78	78.3333	149.5	46.1	76.2	34.0936	5.06	12.29	6.9	1.45	1.16	4.87
100204386	2	1	60	2	2	2	2	2	2	117	119	120	118.667	76	75	75	75.3333	155.1	56.4	90.2	37.4958	5.41	8.09	6.1	4.95	1.34	3.07
100204388	2	1	51	2	2	2	2	2	2	90	93	89	90.6667	52	51	50	51	161.7	51.3	73.4	28.0722	5.04	6.7	6	1.8	1.16	2.94
100204389	2	2	49	2	2	2	2	2	2	116	109	101	108.667	70	67	63	66.6667	156.4	52.5	79.2	32.3781	4.94	5.38	5.5	1.4	1.35	2.88
100204390	2	1	54	2	3	2	2	2	2	78	73	83	78	48	48	47	47.6667	151.3	47.8	79.3	34.6414	5.31	6.81	4.2	1.74	1.03	1.89
100204392	2	1	56	2	3				2	142	144	147	144.333	95	100	97	97.3333	152.3	55.1	76.3	32.8946	5.15	6.08	5.9	2.64	0.98	1.62
100204393	2	1	46	2	3	2	2	2	1	109	100	104	104.333	71	66	68	68.3333	158.1	53.5	75.1	30.0453	5.32	5.77	5.9	1.17	1.46	3.7
100204396	2	1	41	2	3	2	2	2	2	100	98	102	100	64	60	60	61.3333	167.4	51.2	70.2	25.0511	4.89	4.23	5.8	1.15	1.31	2.61
100204398	2	2	59	2	3				2	140	120	128	129.333	75	75	72	74	159.2	66.2	90.5	35.7077	5.05	7.72	5.9	1.25	1.33	2.91
100204400	2	2	53	2	3	2	2	2	2	85	81	85	83.6667	52	56	55	54.3333	163.1	52.5	81.2	30.5245	5.56	5.54	5.9	1.03	1.47	4.25
100204401	2	2	58	2	3	1	2	2	2	128	117	118	121	78	73	71	74	153.8	58	88	37.2023	5.33	7.83	5.8	1.16	1.59	2.7
100204407	2	2	56	2	3	2	2	2	2	96	99	91	95.3333	67	68	64	66.3333	149.5	56.1	76.8	34.362	6.59	9.84	6.1	1.9	1.66	4.01
100204408	2	1	59	2	1	1	2	2	2	131	135	135	133.667	79	82	79	80	150.5	53	83.5	36.8649	5.44	7.59	6.2	1.68	1.05	4.23
100204411	2		55	2	3	2	1	2	2	101	98	94	97.6667		66	65	65.5	142	52.5	86.5	42.8982	4.06	10.03	5.7	2.01	1.44	3.37
100204413	2	2	42	2	3	2	2	2	2	93	92	104	96.3333	64	63	62	63	150	58	84	37.3333	5.53	4.56	5.8	0.87	1.37	2.6
100204414	2	1	63	2	4	2	2	2	2	127	128	116	123.667	71	66	74	70.3333	148.7	50.2	79.4	35.9086	4.89	8.92	6	1.59	1.4	4.66
100204415	2	2	41	2	3	2	2	2	2	93	90	92	91.6667	60	58	52	56.6667	158	62.5	88	35.2508	5.15	7.44	5.9	1.22	1.25	2.43
100204418	2	1	59	2	1	2	2	2	2	124	130	126	126.667	82	84	82	82.6667	165	58	83	30.4867	4.87	6.05	5.9	1.31	1.64	3.65
100204419	2	1	48	2	4				1	98	100	100	99.3333	64	68	64	65.3333	172	66	80	27.0416	5.41	6.14	6.6	0.83	1.77	2.22
100204420	2	1	85	2	1	2	2	2	2	158	139	133	143.333	59	59	59	59	147	44	78	36.0961	6.82	21.75	6.3	1.75	1.43	2.32
100204421	2	2	63	1	3				2	120	95	98	104.333	89	70	65	74.6667	155	70	89	37.0447	8.24	12.77	8	2	1.22	2.74
100204423	2	1	69	2	1	2	2	2	2	103	107	91	100.333	84	90	60	78	148	56	72	32.8707	6.5	10.8	6.7	1.79	1.22	3.15
100204424	2	1	58	2	1	2	2	2	2	95	104	96	98.3333	61	63	65	63	157	54	82	33.2671	5.42	6.63	6.8	0.87	2.23	4.1
100204426	2	2	49	2	1	2	2	2	2	110	124	106	113.333	71	70	67	69.3333	152	49	69	29.865	5.09	6.95	5.8	1.97	1.36	2.95
100204427	2	1	48	2	1	2	2	2	2	159	148	155	154	109	104	100	104.333	157	61	80	32.4557	5.41	7.87	6.3	2.11	1.21	3.31
100204428	2	2	62	2	1	2	2	2	2	98	94	92	94.6667	62	58	64	61.3333	153	48	75	32.039	6.18	6.99	6.4	1.71	1.27	3.03
100204429	2	1	53	2	1	2	2	2	2	110	140	132	127.333	70	80	80	76.6667	157	64	85	34.4842	5.48	8.51	6.5	1.89	1.35	3.49
100204431	2	2	81	2	1	2	2	2	2	154	150	130	144.667	72	60	70	67.3333	146	46	81	37.9996	6.28	13.53	6.6	0.96	1.59	3.37
100204433	2	2	53	2	1	2	2	2	2	122	114	111	115.667	78	73	72	74.3333	155	48	70	29.1363	8.54	20.22	8.2	1.33	1.7	3.19
100204434	2	1	46	2	1	2	2	2	2	133	130	126	129.667	85	82	81	82.6667	156	77	95	39.0368	4.87	5.37	5.9	1.06	1.58	2.25
100204435	2	2	77	2	1	2	2	2	2	153	159	148	153.333	82	90	89	87	142	48	71	35.2113	5.74	8.3	6.3	0.92	1.73	2.99
100204437	2	1	46	2	3	2	2	2	2	104	98	102	101.333	70	64	62	65.3333	150.2	57	79.5	35.2393	5.39	6.98	6.9	1.26	1.62	1.95
100204438	2	2	58	2	1	2	2	2	2	118	120		119	90	86		88	147	52	84	38.8727	5.33	6.72	5.6	1.16	1.78	3.8
100204439	2	2	58	2	1	2	2	2	2	143	126	123	130.667	68	75	73	72	155	68	88	36.6285	7.77	12.29	7.6	2.43	1.2	2.62
100204440	2	2	58	2	1	2	2	2	2	125	117	118	120	81	88	80	83	158	54	80	32.0461	5.21	5.67	6.8	1.92	1.31	3.47
100204443	2	2	67	2	1	2	2	2	2	97	111	102	103.333	60	60	57	59	140	40	75	38.2653	4.77	8.05	6.1	0.85	1.26	2.44
100204445	2	1	52	2	1	2	2	2	2	100	102	98	100	60	66	62	62.6667	157	65	89	36.1069	5	5.57	6.5	0.94	1.94	1.98
100204448	2	2	47	2	1	2	2	2	2	92	87	91	90	58	57	57	57.3333	154	57	73	30.7809	5.27	6.74	6.2	0.73	1.64	2.54
100204449	2	1	57	2	1	2	2	2	2	126	125	120	123.667	83	81	77	80.3333	152	41	66	28.5665	11.06	22.86	8	1.06	1.98	2.79
100204450	2	2	56	2	1	2	2	2	2	124	120	110	118	86	80	70	78.6667	153	58	75	32.039	5.4	4.52	6	1.23	1.65	1.92
100204460	2	1	61	2	1	2	2	2	2	109	106	102	105.667	71	72	70	71	162	57	81	30.8642	4.62	5.35	5.9	1.85	1.82	3.7
100204462	2	2	46	2	1	2	2	2	2	144	134	146	141.333	89	87	84	86.6667	166	72	94	34.1124	6.04	7.24	5.9	1.23	1.4	2.83
100204464	2	1	66	1	1	2	2	2	2	124	141	137	134	82	80	77	79.6667	152	68	103	44.581	11.55	15.29	9.5	3.3	1.18	2.79
100204465	2	1	54	2	1	2	2	2	2	123	104	116	114.333	74	75	74	74.3333	159	53	72	28.4799	6.02	10.14	6.4	1.31	1.58	2.79
100204466	2	1	46	2	5	2	2	2	2	99	93	90	94	62	58	57	59	162.6	47.5	73.5	27.8001	4.94	5.49	5.3	0.81	2.04	1.73
100204471	2	2	61	2	1	2	2	2	2	142	142	153	145.667	76	73	72	73.6667	147	52	78	36.0961	7.92	17.02	8.2	3.99	1.13	2.39
100204473	2	2	52	2	1	2	2	2	2	126	130	118	124.667		78	76	77	154	64.5	86	36.2624	4.74	6.09	5.7	1.29	1.33	3.04
100204474	2	1	55	2	1	2	2	2	2	118	118	103	113	61	66	58	61.6667	144	42	73	35.2045	5.23	5.95	5.8	0.96	1.61	2.81
100204475	2	1	58	2		2	2	2	2	142	124	143	136.333	82	80	77	79.6667	156	55	87.4	35.9139	5.4	5.9	5.9	1.31	1.51	3.59
100204477	2	2	49	2	4	2	2	2	2	110			110	80			80	178	73	101.4	32.0035	5.86	7.17	6	0.74	2.22	2.19
100204478	2	1	55	2	3	2	1	2	2	136	146	124	135.333	84	88	83	85	147.5	52.5	83	38.15	5.59	10.25	6.1	2.11	1.22	3.1
100204482	2	2	42	2	1	2	2	2	2	116	120	110	115.333	76	80	78	78	154	53	79	33.3108	5.51	5.85	5.7	2.46	1.16	2.5
100204486	2	2	51	2	4	2	2	2	2	150	146	149	148.333	100	98	101	99.6667	153.5	51.5	79	33.5282	5.06	7.81	12	0.96	1.4	2.7
100204487	2	1	52	2	5	2	2	2	2	95	94	97	95.3333	60	65	63	62.6667	163	63	76	28.6048	5.05	7.64	5.8	1.09	1.49	2.82
100204488	2	2	42	2	3	2	2	2	1	99	104	102	101.667	65	60	62	62.3333	139.5	35.5	60	30.8321	4.62	5.93	5.9	0.8	1.69	3.17
100204489	2	1	54	2	4	2	2	2	2	93	110	109	104	68	69	67	68	169.5	54.5	73.2	25.4784	4.48	7.39	5.5	1.29	1.65	3.03
100204490	2	2	76	2	3	2	2	2	2	130	124	121	125	67	63	62	64	161	73	101	38.9645	4.97	7.95	6.2	2.15	1.32	4.89
100204491	2	2	55	2	4	2	2	2	2	111	95	105	103.667	69	74	70	71	143	44	71	34.7205	5.55	6.69	5.8	0.62	1.76	1.75
100204493	2	2	58	2	5	2	2	2	1	112	108	111	110.333	73	78	83	78	153.5	62	87	36.9235	5.11	6.81	5.9	0.78	1.57	2.55
100204494	2	2	41	2	2	2	2	2	2	98	100	102	100	60	62	64	62	155	51	74	30.8012	4.84	7.85	5.9	0.6	1.59	1.75
100204495	2		73	2	1	2	2	2	2	117	105	123	115	65	62	57	61.3333	149.5	42.5	65	29.0824	5.3	6.63	6.6	0.98	1.49	3.72
100204496	2	2	43	2	2	1	2	2	1	149	153	146	149.333	100	102	97	99.6667	146	50	76.5	35.8885	7.33	9	5.7	2.89	1.99	4.21
100204498	2	2	48	2	3	2	2	1	2	124	124	126	124.667	83	80	82	81.6667	153	53	75	32.039	5.2	8.6	6	1.6	1.71	3.24
100204499	2	2	48	1	3	2	2	2	2	123	102	104	109.667	76	78	80	78	162.5	61	85	32.1893	13.97	19.4	11.1	4.29	1.16	3.13
100204500	2	2	48	2	4	2	2	2	2	98	91	95	94.6667	61	63	59	61	152	48.5	67	28.9993	4.75	6.5	5.8	1.13	1.72	2.25
100204501	2	1	58	2	3	2	2	2	1	116	110	109	111.667	80	78	76	78	143.5	54	84.5	41.0349	6.45	7.63	6.8	1.1	1.36	3.76
100204502	2	1	55	2	3	2	2	2	2	125	111	103	113	70	65	62	65.6667	149.5	60	78	34.8989	5.4	6.83	6	1.12	1.47	2.08
100204503	2	1	62	2	3	2	2	2	2	104	89	101	98	68	65	66	66.3333	152	60	84	36.3573	5.22	6.78	5.8	2.27	1.14	1.81
100204504	2	2	57	2	3	2	2	2	2	98	102	94	98	68	70	68	68.6667	154.5	59.5	86	36.0281	4.9	7	6.4	1.78	1.88	1.99
100204506	2	2	57	2	3	2	2	2	2	109	116	116	113.667	76	76	77	76.3333	153	64	92.5	39.5147	6.63	14.72	7	1.81	1.32	2.07
100204510	2	1	56	2	2	2	2	2	2	116	117	110	114.333	78	78	76	77.3333	153.5	61	93	39.4699	5.55	6.64	6.1	2.34	1.09	3.14
100204512	2	2	56	2						127	122	120	123	88	80	82	83.3333	157	43	68	27.5873	4.51	8.69	5.7	0.91	1.33	0.79
100204514	2	2	54	2	2	2	2	2	2	90	90	88	89.3333	63	63	59	61.6667	150	56	82.5	36.6667	4.56	7.19	5.6	1.14	1.17	2.78
100204515	2	1	58	2	3	2	2	1	1	131	132	130	131	89	89	86	88	148	72.5	100	45.6538	6.37	9.92	6.7	1.93	1.35	3.36
100204520	2	2	58	2	5	2	2	2	2	119	106	110	111.667	81	76	86	81	153	61.5	94.5	40.3691	4.84	7.56	6	1.85	1.37	2.16
100204522	2	1	57	2	3	2	2	2	2	98	100	100	99.3333	71	70	70	70.3333	149.5	57.5	82	36.6886	4.91	6.77	5.8	1.16	1.28	3.04
100204525	2	2	54	2	3	2	2	2	2	123	118	120	120.333	94	70	72	78.6667	154	50	76	32.0459	5.52	8.93	6.1	1.29	1.42	2.52
100204529	2	2	42	2	3	2	2	2	1	127	125	127	126.333	81	80	82	81	150.5	63	80.5	35.5404	5.35	7.82	5.8	4.25	1.01	2.28
100204530	2	2	47	2	5	2	2	2	1	100	100	100	100	65	65	65	65	152	41	65	28.1337	5.28	4.98	5.7	0.74	1.84	2.2
100204533	2	1	71	1	3	2	2	2	2	109	109	105	107.667	71	71	70	70.6667	156	58	82	33.6949	6.8	10.77	7.9	3.31	1.25	2.35
100204539	2		58	2	2	2	2	2	2	87	90	90	89	53	55	54	54	147	43	69	31.9311	5.56	6.34	6.3	1.45	1.16	2.74
100204540	2		65	1	2	1	2	1	2	150	143	146	146.333	93	92	92	92.3333	149	56	86	38.737	8.16	16.57	7.3	1.18	0.99	2.18
100204543	2	1	60	2	3	2	2	1	2	121	122	120	121	74	70	71	71.6667	151.5	59	84	36.5977	4.98	8	6.2	2.36	1.11	1.73
100204544	2	2	67	2	3	1	2	2	2	182	180	182	181.333	91	90	92	91	144	60	95	45.814	5.39	8.31	7.3	1.81	1.54	3.44
100204549	2	1	50	2	4	2	2	2	1	96	100	98	98	64	60	60	61.3333	161	56	76	29.3199	5.15	5.19	5.8	1.52	1.43	3.67
100204550	2	1	57	2	4	2	2	2	1	100	100	100	100	67	65	67	66.3333	157	55.5	81	32.8614	5.45	12.75	6.3	1.47	1.22	2.4
100204552	2	1	53	2	2	2	2	2	1	112	110	110	110.667	75	75	75	75	166.5	73	91	32.8256	6.41	9.9	6.3	1.39	1.28	2.81
100204554	2	1	59	2	3	2	2	2	2	110	110	110	110	77	75	77	76.3333	151	53	74.5	32.674	4.8	6.3	5.9	1.15	1.65	3.34
100204558	2	1	55	2	3	2	2	2	1	117	115	117	116.333	73	73	73	73	155	57.5	81	33.7149	5	6.11	6.1	1.18	1.78	3.06
100204562	2	1	59	2	3	2	1	1	1	139	139	139	139	81	81	80	80.6667	152	53	78	33.7604	5.74	10.38	6.6	2.51	1.63	3.4
100204563	2	1	61	2	4	2	2	2	1	149	145	149	147.667	79	79	80	79.3333	152	53	81	35.0589	5.29	5.8	6.8	1.87	1.16	2.85
100204564	2	1	58	2	2	2	2	2	2	89	90	89	89.3333	62	62	62	62	156	52	75	30.8185	5.38	7.25	5.9	1.04	1.57	2.51
100204566	2	2	55	2	3	2	2	2	2	108	105	108	107	67	65	67	66.3333	146	58	89	41.7527	5.52	9.33	6	2.01	1.36	3.28
100204567	2	1	68	2	3	2	2	2	2	146	148	150	148	86	88	84	86	153	74	98	41.8642	5.11	7.4	5.9	2.33	1.37	2.59
100204569	2	2	57	2	3	2	2	2	2	93	100	91	94.6667	64	64	61	63	166	61.5	81.5	29.5761	4.93	9.02	6	1.67	0.91	2.02
100204571	2	2	48	2	3	2	2	2	2	101	100	101	100.667	72	75	75	74	156	52	73	29.9967	5.5	5.94	6.1	0.81	2.13	3.93
100204572	2	2	51	2	2	2	2	2	2	104	106	104	104.667	70	72	70	70.6667	155	66	86	35.796	5.27	7.3	5.7	2.03	0.96	2.14
100204575	2	2	46	2	3	2	2	2	2	100	102	104	102	86	88	84	86	153	58	87	37.1652	5.25	5.82	6.3	0.78	1.46	2.79
100204576	2	2	56	2	3	2	2	2	2	112	118	116	115.333	67	70	74	70.3333	146	57	83	38.9379	6.13	7.29	6.5	1.42	1.4	4.02
100204588	2	2	54	2	4				2	98	98	100	98.6667	74	75	75	74.6667	159.5	65.5	75	29.4808	4.71	4.4	5.8	0.87	1.77	3.07
100204590	2	1	54	2	5	1	2	2	1	104	104	104	104	75	75	75	75	150	57	85	37.7778	5.39	10.46	6.3	0.96	1.58	3.03
100204591	2	2	62	1	3	1			2	145	145	145	145	101	100	101	100.667	162	62	93	35.4367	7.2	12.17	8.4	1.65	1.47	3.87
100204594	2	2	52	2	3	2	2	2	1	116	115	116	115.667	74	75	75	74.6667	159.5	48	67.5	26.5328	5.42	4.75	6.2	1.22	1.85	3.68
100204600	2		64	2	3	2	2	1	2	125	123	124	124	76	72	75	74.3333	155	60	87	36.2123	5.35	9.74	6.4	2.27	1.52	3.06
100204602	2	1	58	2	3		2	2		135	135	135	135	70	70	70	70	155	53	81	33.7149	4.75	8.63	6.4	1.61	1.29	2.16
100204604	2	1	55	2	4	2	2	2	2	98	98	100	98.6667	65	65	65	65	155	56	78	32.4662	4.63	7.08	6.1	1.38	1.64	2.83
100204607	2	2	48	2	4				2	112	110	112	111.333	82	80	80	80.6667	160	70	87	33.9844	6.33	13.51	7.2	4.19	1.21	3.17
100204609	2	1	52	2	3	1			1	120	120	120	120	77	75	75	75.6667	155	60	84	34.9636	6.37	12.49	7	2.41	1.07	3.84
100204610	2	1	45	2	2	2	2	2	2	117	115	117	116.333	81	81	80	80.6667	151	45	62	27.1918	4.8	8.75	5.8	0.7	1.78	1.41
100204611	2	2	41	2	3		2	2	2	107	105	107	106.333	69	70	69	69.3333	151	60	84	36.8405	4.85	8.44	6	0.62	1.53	2.64
100204612	2		57	2	3	2	2	2	2	148	145	147	146.667	90	92	89	90.3333	155	55	84	34.9636	4.93	6.74	6.2	1.73	1.47	3.25
100204613	2	1	52	2	3				1	121	120	120	120.333	74	75	75	74.6667	145	59	90	42.8062	6.63	15.13	6.7	0.93	1.5	4.32
100204614	2	2	51	2	4	2	2	2	1	120	120	120	120	77	75	75	75.6667	162	69	88	33.5315	5.43	12.75	6.5	1.57	1.67	3.22
100204615	2	1	47	2	3	2	2	1	1	150	150	150	150	97	95	95	95.6667	162	84	111	42.2954	6.15	7.63	6.6	1.19	1.09	2.62
100204616	2	2	48	2	3	1		2	1	115	115	110	113.333	92	92	90	91.3333	145	50	74	35.1962	4.73	6.1	6.8	1.47	1.53	2.79
100204620	2		83	2	1				2	150	146	140	145.333	62	62	64	62.6667	154	55	89	37.5274	5.09	5.89	6.4	1.22	1.36	3.65
100204621	2	1	63	1	3	2	2	2	2	143	145	143	143.667	86	85	86	85.6667	155	59.5	86	35.796	5.92	16.04	7.2	1.75	1.43	3
100204623	2	2	58	2	3	2	2		2	138	136	134	136	72	74	76	74	154	60	89	37.5274	5.66	8.35	6.7	0.63	1.45	3.05
100204624	2	1	49	2	3	2	2	2	2	117	120	114	117	66	68	72	68.6667	154	55	72	30.3593	5.52	7.18	6.6	1.35	0.94	2.48
100204625	2	2	49	2	3	2	2	2	2	104	106	112	107.333	72	76	74	74	170	50.5	75	25.9516	4.92	7.37	5.6	1.2	1.69	1.55
100204626	2	1	61	2	3	2	2	2	2	116	110	112	112.667	65	68	66	66.3333	154	55.5	98	41.3223	5.17	7.98	6.9	1.13	1.3	3.25
100204630	2	1	50	2	4	2	2	1	1	103	105	103	103.667	81	80	80	80.3333	157	58	81	32.8614	4.68	10.97	6.5	3.03	1.63	4.19
100204637	2	2	42	2	5			2	2	87	89	89	88.3333	65	65	65	65	158	58	78	31.245	4.81	5.74	5.5	3.39	0.8	1.38
100204643	2	2	58	2	3	2	2	2	2	138	135	138	137	88	85	88	87	154	75	95	40.0573	5.18	10.48	6.4	1.69	1.05	3.46
100204649	2	2	56	2	2	2	2	1	2	112	110	112	111.333	74	75	75	74.6667	153	57	78	33.3205	5.51	7.96	6.8	2.35	1.54	3.63
100204652	2	1	53	2	3	2	2	2	2	162	165	160	162.333	104	100	100	101.333	154	55	77	32.4675	5.66	8.37	5.7	2.29	1.21	3.01
100204657	2	1	59	2	2	1	2	2	2	180	180	180	180	110	110	110	110	153	70	93	39.7283	4.94	7.26	6.2	0.74	1.06	2.66
100204659	2		64	2	2	2	2	2	2	139	139	139	139	92	90	90	90.6667	164	73	84	31.2314	5.66	11.78	5.8	1.46	1.57	3.19
100204664	2	2	48	2	3	2	2	2	2	107	105	107	106.333	72	70	75	72.3333	157	56	76	30.8329	5.2	7.56	6.3	1.25	1.23	2.86
100204665	2	2	62	2	5				1	110	110	110	110	63	63	63	63	158	45	67	26.8386	4.77	4.86	6.3	1.37	1.32	2.37
100204668	2	1	59	2	2	2	2	2	2	105	102	108	105	74	70	76	73.3333	152	62	84	36.3573	4.84	8.42	6.1	1.86	1.48	3.71
100204669	2	1	61	2	3	2	2	2	1	139	140	140	139.667	82	80	80	80.6667	151	78	109	47.8049	6.28	13.58	7.2	2.1	1.22	2.81
100204673	2	2	64	1	3	1	2	2	1	144	140	140	141.333	90	88	86	88	153	59	93	39.7283	7.91	15.16	7.7	1.55	1.19	3.75
100204675	2		47	2	3	2	2	2	2	102	108	100	103.333	72	70	68	70	152	48	71	30.7306	4.52	4.18	5.7	0.68	1.59	1.53
100204678	2	2	59	2	2	2	2	2	2	136	130	132	132.667	73	80	76	76.3333	152	55	79	34.1932	5.26	11.23	6.4	0.99	1.52	3.8
100204679	2	1	51	2	2				2	106	110	102	106	72	70	68	70	150	49	79	35.1111	5.14	6.78	6	1.69	1.83	3.89
100204680	2	2	54	2	1	2	2	1	2	121	120	116	119	69	70	72	70.3333	152	58	87	37.6558	6.33	11.11	7.2	1.22	1.46	3.74
100204682	2	1	53	2	3	2	2	2	2	126	124	130	126.667	88	82	89	86.3333	155	55	76	31.6337	4.72	5.99	5.4	1	1.38	2.83
100204684	2	1	53	2	4	2	2	2	1	118	115	115	116	80	80	80	80	165	71	80	29.3848	8.02	13.68	6.8	2.02	1.31	4.04
100204685	2		54	2	4	2	2	2	2	115	110	120	115	71	76	78	75	145	46	71	33.7693	4.73	10.35	5.9	1.63	1.4	2.31
100204687	2	2	50	2	3				1	103	100	100	101	70	70	70	70	157	52	77	31.2386	5.57	6.38	5.9	0.82	1.92	3.48
100204688	2	1	60	2	3				1	124	125	125	124.667	104	100	100	101.333	157	64	99	40.1639	5.53	7.79	5.8	2.75	1.06	2.01
100204695	2	1	48	2	4	2	2	2	2	106	105	105	105.333	78	75	75	76	151	65	93	40.7877	6.09	14.55	6.6	1.18	1.15	2.32
100204696	2	1	62	2	4	1	2	2	2	145	146	145	145.333	88	76	80	81.3333	153.5	68	94	39.8943	4.99	9.97	6.4	1.68	1.58	3.79
100204698	2	1	56	2	4	2	2	1	2	123	125	125	124.333	78	78	78	78	144.5	54	81	38.7926	4.71	7.67	6	1.34	1.43	3.67
100204699	2	1	61	1	4	2	2	2	1	103	100	102	101.667	56	60	62	59.3333	162	57	74	28.1969	11.18	18.08	8	1.04	1.99	2.76
100204701	2	2	55	2	1				1	130	128	130	129.333	90	90	90	90	152	62	100	43.2825	5.34	3.65	6.6	0.92	0.49	1.3
100204702	2	1	68	2	1	2	2	2	2	120	120	120	120	83	80	80	81	148.5	56.5	85	38.5448	5.37	7.09	6.4	0.69	0.67	1.94
100204705	2	2	51	2	5	2	2	2	1	96	95	96	95.6667	66	65	65	65.3333	165	57.5	86	31.5886	4.67	6.3	5.6	0.34	0.53	0.61
100204712	2	1	54	2	2					99	99	99	99	62	65	62	63	147	43	69	31.9311	4.93	7.44	6.2	0.53	0.8	1.61
100204713	2	2	57	2	3	2	2	1	1	126	124	118	122.667	80	78	80	79.3333	154	58	81	34.1542	4.76	6.87	6.1	0.59	0.29	0.62
100204714	2		61	2	3	1			2	148	154	152	151.333	98	96	94	96	155	63	91	37.8772	4.98	7.46	5.3	0.46	0.89	1.33
100204715	2	2	62	2	3	2	2	2	2	107	105	105	105.667	81	80	80	80.3333	155	65	91	37.8772	5.62	7.38	6.6	0.83	0.46	1.29
100204716	2	2	64	2	2	1			2	147	145	145	145.667	70	70	70	70	154	63	87	36.6841	4.82	13.51	6.7	0.7	0.55	1.26
100204718	2	1	52	2	2	2	2	2	1	107	105	105	105.667	62	65	65	64	153	50	71	30.3302	5.7	7.71	6.8	0.46	0.64	1.33
100204719	2	2	63	2	2	2	2	2	2	107	105	107	106.333	71	70	70	70.3333	154	58	87	36.6841	4.91	12.55	6.8	0.99	0.46	1.16
100204720	2	1	60	2	4	2	2	2	1	103	105	105	104.333	65	65	65	65	152	52	73	31.5963	4.99	7.16	6.3	0.37	0.44	0.82
100204722	2	2	65	2	2	2	2	2	2	111	110	110	110.333	64	65	65	64.6667	155	45	71	29.5525	5.36	6.28	6.2	0.64	0.98	2.88
100204724	2	1	48	2	2	2	2	2	2	105	105	105	105	70	70	70	70	157	61	80	32.4557	5.42	4.46	6.2	0.65	0.66	1.19
100204725	2	1	50	2	4	2	2	2	2	107	105	107	106.333	58	60	58	58.6667	163	64	83	31.2394	5.25	7.73	6.2	1.45	0.87	1.68
100204729	2	1	54	2	3	2	2	2	2	116	110	112	112.667	68	70	76	71.3333	159.5	56	78	30.6601	4.85	7.74	6.3	0.72	1.2	1.71
100204730	2	2	49	2	5	1	2	2	1	137	140	138	138.333	95	94	94	94.3333	153	57	79	33.7477	4.87	8.97	5.5	4.65	0.69	1.21
100204732	2	1	57	2	4	2	2	2	2	127	125	125	125.667	70	70	70	70	152	55	80	34.626	5.21	7.19	6.1	1.17	1.69	2.53
100204734	2	2	62	2	3	1	2	2	1	125	126	130	127	75	78	80	77.6667	139	40	70	36.23	5.62	12.3	6.7	1.47	0.98	2.66
100204736	2	1	55	2	2	2	2	2	2	109	110	108	109	76	70	72	72.6667	153	51	83	35.4564	4.99	6.54	6.2	1.32	1.41	2.84
100204737	2	1	70	2	4	1	2		2	173	175	175	174.333	110	112	114	112	167	66	88	31.5537	5.03	8.04	6	1.17	1.01	2.43
100204738	2	1	68	2	4	2	2	2	2	132	130	130	130.667	90	90	90	90	154	55	83	34.9975	5.28	10.04	6.1	1.21	1.3	1.79
100204740	2	1	52	2	2	2	2	2	1	109	110	112	110.333	71	71	72	71.3333	157	66.5	85.5	34.687	4.76	5.32	6.1	1.46	1.1	2.04
100204742	2	2	52	2	4	2	2	2	2	101	100	102	101	68	70	72	70	149	48	69	31.0797	5.59	6.07	6.3	0.76	2.16	1.98
100204745	2	2	56	2	3	2	1	2	2	139	138	139	138.667	85	80	82	82.3333	149	57.5	91.5	41.2144	6.09	6.58	6.4	1.01	2.01	2.53
100204746	2	2	58	2	3	1	1	2	2	137	140	138	138.333	78	80	89	82.3333	144	57	92	44.3673	5.45	7.41	6.4	1.01	2.11	3.19
100204753	2	2	48	2	2	2	2	2	2	100	102	103	101.667	68	70	72	70	156	60	84	34.5168	5.47	7.61	5.9	1.62	2.05	2.48
100204757	2	2	58	2	2	2	2	2	2	93	93	93	93	64	65	65	64.6667	147	47	70	32.3939	5.08	8.11	6.2	2.36	1.11	2.65
100204765	2	2	57	1	2	1	1	2	1	142			142	70			70	156	70	102	41.9132	7.73	10.82	8.3	4.41	1.09	2.53
100204771	2	2	59	2	2	2	2	2	2	127	126	124	125.667	83	80	82	81.6667	161.5	71	88	33.7394	6.2	11.31	5.8	3.14	1.25	2.58
100204774	2	1	58	2	4	1	2	2	2	138	134	130	134	77	70	76	74.3333	153	79	100	42.7186	7.03	12.5	6.7	2.1	1.29	3.38
100204775	2	2	62	2	3	2	2	2	2	113	110	108	110.333	66	70	72	69.3333	161	50	74	28.5483	5.32	7.14	6.4	1.36	1.49	3.28
100204776	2	2	52	2	4	2	2	2	2	95	92	98	95	61	60	66	62.3333	153	49	68	29.0487	5.13	6.04	5.9	1.24	1.38	2.64
100204778	2	1	53	2	4	2	2	2	2	110	118	110	112.667	68	70	72	70	152	54	74	32.0291	5.12	5.93	6.2	0.62	1.66	4.39
100204785	2	1	46	2	2	2	2	2	1	95	96	98	96.3333	67	62	66	65	158	50	71	28.441	5.84	9.41	6.1	1.32	1.51	3.37
100204788	2	1	44	2	3				2	123	120	118	120.333	75	70	72	72.3333	150	44	64	28.4444	5.72	7.96	6.2	0.52	1.73	3.23
100204790	2	1	60	2	2	2	2	2	2	117	120	112	116.333	70	70	68	69.3333	151	60	78	34.209	5.65	7	6.3	0.9	1.29	2.22
100204793	2	1	48	2	4	2	2	2	2	125	100	128	117.667	73	68	70	70.3333	163	54	67	25.2174	5.44	7.19	6.3	0.99	1.49	2.48
100204794	2	1	59	2	3	2	2	2	2	124	120	118	120.667	71	70	70	70.3333	151	62	86	37.7176	5.46	11.85	6.9	3.64	1.17	2.89
100204797	2	2	45	2	4	2	2	2	1	114	118	112	114.667	79	80	76	78.3333	158	76	103	41.2594	14.1	24.81	11.3	3.37	1.02	2.43
100204798	2	1	53	2	3				2	120	118	116	118	79	80	72	77	158	69	86	34.4496	12.01	17.81	11.1	7.32	1.34	2.76
100204800	2	2	55	1	4	2	2	2	1	108	108	108	108	84	76	76	78.6667	152	48	73	31.5963	4.75	6.62	6.7	1.24	1.7	2.57
100204801	2	1	54	2	4	2	2	2	2	94	92	90	92	67	68	70	68.3333	158	50	68	27.2392	4.76	6.02	5.7	0.91	1.77	3.32
100204804	2	1	53	2	4	2	1	1	2	128	128	128	128	88	88	85	87	158	76	94	37.6542	5.29	7.17	6.2	4.71	0.97	3.11
100204805	2	1	55	2	4	2	2	2	1	139	136	134	136.333	81	86	82	83	163	54	82	30.863	6.01	7.28	6.5	1.25	1.77	3.28
100204807	2	1	55	2	4	2	2	2	1	97	94	92	94.3333	58	60	55	57.6667	150	46	71	31.5556	5.18	8.42	5.7	0.98	2.22	3.29
100204810	2	2	47	2	4	2	2	2	2	189	180	176	181.667	109	100	104	104.333	160	101	107	41.7969	5.49	11.4	6.4	1.56	1.45	2.8
100204811	2	2	73	1	4	2	2	2	2	149	142	148	146.333	92	90	96	92.6667	151	57	84	36.8405	7.47	10.97	6.8	2.15	0.89	2.18
100204813	2	2	54	2	2	2	2	2	2	129	120	124	124.333	80	86	78	81.3333	157	58	78	31.6443	5.89	9.35	6.3	1.5	1.31	3.33
100204814	2	1	50	2	5	2	2	2	2	107	108	109	108	76	75	75	75.3333	158	50	87	34.8502	4.62	6.2	6.3	0.96	1.97	2.81
100204819	2	1	55	2	4	2	2	2	1	143	144	145	144	89	90	88	89	155	66.5	93	38.7097	7.62	13.65	7.2	4.44	1.49	3.68
100204829	2	1	51	2	4	2	2	2	2	129	130	132	130.333	81	80	80	80.3333	165	55	74	27.1809	5.66	10.41	6	1.81	1.81	3.17
100204830	2	1	45	2	3	2	2	2	2	114	115	116	115	76	75	74	75	160	60	88	34.375	4.75	5.17	6.2	0.66	0.91	1.99
100204831	2		46	2	4	2	2	2	2	118	120	122	120	82	80	80	80.6667	155	49.5	71	29.5525	4.15	5.72	5.7	0.67	1.55	1.73
100204832	2	1	54	2	3	2	2	2	2	112	112	115	113	71	70	70	70.3333	154	73	98	41.3223	5.45	7.7	6.2	1.83	1.79	2.89
100204834	2	1	62	2	3	1	2	2	2	126	126	126	126	70	70	70	70	152	57	81	35.0589	5.13	8.14	5.8	2.44	0.98	3.18
100204839	2	2	40	2	5	2	2	2	1	98	98	98	98	60	60	60	60	152	51	69	29.865	4.93	6.7	5.6	0.88	1.61	2.72
100204840	2	1	41	2	5	2	2	2	2	112	115	116	114.333	72	74	72	72.6667	153	47	71	30.3302	5.32	6.49	5.7	1.06	1.94	3.31
100204841	2	2	47	2	3	2	2		2	105	105	105	105	67	67	67	67	146	39	67	31.4318	5.17	6.31	5.6	0.53	1.52	1.99
100204842	2	1	41	2	3	2	2	2	2	104	110	110	108	74	72	70	72	157	60	76	30.8329	5.7	4.81	5.7	0.87	1.79	1.8
100204843	2	2	55	2	4	1	2	2	1	117	118	118	117.667	61	62	63	62	157	57	78	31.6443	4.58	6.41	5.9	1	1.59	2.4
100204844	2	1	58	2	2	2	2	2	2	139	140	142	140.333	91	92	90	91	166	56	79	28.6689	6.07	11.29	6.6	2.18	1.71	4.62
100204848	2	1	58	2	3	2	2	2	1	145	140	142	142.333	77	78	80	78.3333	154	80	70	29.5159	5.78	9.97	6.1	1.05	1.23	2.49
100204852	2	2	54	2	3	2	2	1	2	128	130	132	130	79	80	80	79.6667	155	59	82	34.1311	5.47	11.56	6.3	1.65	1.43	4.95
100204853	2	1	60	2	4	2	2	2	2	135	136	140	137	82	80	82	81.3333	150	59	84	37.3333	6.44	9.83	6.4	1.37	1.27	2.85
100204858	2	1	47	2	3	2	2	2	2	119	120	122	120.333	77	74	75	75.3333	152	59	86	37.223	5.38	6.21	5.8	1.02	1.16	2.98
100204859	2	1	43	2	2	2	2	2	2	124	126	124	124.667	49	50	50	49.6667	148	46	69	31.5011	5.38	6.52	5.2	0.83	1.88	3.67
100204860	2	1	40	2	2	2	2	2	2	100	102	104	102	64	66	64	64.6667	162	53	69	26.2917	5.28	6.74	5.3	0.74	1.42	2.71
100204861	2	2	56	2	3	2	2	2	2	125	124	125	124.667	73	70	72	71.6667	155	58	80	33.2986	5.12	6.94	6.1	1.63	1.4	3.36
100204863	2	1	48	2	3	2	2	2	1	101	102	103	102	69	70	72	70.3333	153	54	76	32.4661	5.92	6.32	6	0.47	1.97	1.58
100204864	2	2	50	2	3	2	2	2	2	125	126	126	125.667	83	80	82	81.6667	150	50	78	34.6667	7.86	18.42	7.8	0.95	1.46	3.37
100204865	2		55	2	3	2	2	2	2	120	122	120	120.667	71	72	73	72	158	58	74	29.6427	5.28	9.43	6.2	0.63	1.91	2.58
100204870	2	1	49	2	2	2	2	2	2	124	125	125	124.667	84	85	85	84.6667	162	71	92	35.0556	5.47	7.3	6.2	1.83	1.47	3.89
100204871	2	2	43	2	4	2	2	2	2	130	131	130	130.333	70	70	71	70.3333	157	49	67	27.1816	5.08		5.8	0.86	1.93	2.96
100204879	2	1	48	2	3	2	2	2	1	87	87	87	87	63	63	63	63	156	49.5	68	27.9421	4.95	4.04	5.7	1	1.54	2.91
100204880	2	1	56	2	2	2	2	2	2	129	129	130	129.333	76	76	75	75.6667	148.7	56.5	76.5	34.5971	4.94	5.75	6.1	0.61	1.74	3.2
100204881	2	2	40	2	3	2	2	2	2	107	107	107	107	76	76	76	76	156.5	50	72	29.3971	5.01	5.85	5.6	1.19	1.94	2.32
100204882	2	2	53	2	4	2	2	2	2	135	135	135	135	75	75	76	75.3333	151.2	57	79	34.556	5.34	7.24	5.5	1.46	1.22	2.68
100204883	2	2	60	2	5	2	2	2	2	118	117	118	117.667	74	75	75	74.6667	146.5	46.5	73.5	34.2462	4.82	6.59	5.3	2.71	1.36	3.51
100204884	2	2	53	2	3	2	2	2	2	95	95	95	95	67	67	67	67	151	39.5	65	28.5075	4.7	4.94	5.8	0.75	1.69	2.3
100204885	2	1	50	2	5	2	2	2	2	109	109	110	109.333	72	72	72	72	152	41.5	65	28.1337	5.18	4.47	6.1	0.99	1.52	3.79
100204886	2	1	57	2	5				1	122	120	122	121.333	86	80	78	81.3333	163	63	83	31.2394	5.11	6.32	5.9	2.12	1.29	3.27
100204888	2	1	58	2	2	2	2	2	1	112	100	112	108	73	70	72	71.6667	159	62	84	33.2265	5.32	10.05	6.6	2.89	1.07	2.74
100204890	2	1	47	2	4	2	2	2	2	87	90	88	88.3333	56	60	60	58.6667	152	46	83	35.9245	5.14	5.82	6.4	0.83	1.79	2.89
100204893	2	1	46	2	4	2	2	2	1	100	102	102	101.333	68	70	70	69.3333	156	55	74	30.4076	5.05	7.46	6.3	2	1.77	3.33
100204895	2	2	79	2	2	2	2	2	2	119	160		139.5	88	82		85	151	52.5	87	38.1562	6.51	12.4	6.5	2.11	1.5	4.35
100204896	2	1	50	2	4	2	2	2	2	120	122	120	120.667	85	84	80	83	152	52	80	34.626	6.51	8.39	6.4	1.74	1.44	3.57
100204897	2	1	58	2	3	2	2	2	2	110	112	112	111.333	67	72	72	70.3333	151	59	85	37.2791	5.57	10.43	6.5	1.05	1.32	2.77
100204901	2	1	48	2	3	2	2	2	2	90	92	92	91.3333	58	60	60	59.3333	149	62	75.5	34.0075	5.33	6.41	5.9	0.35	1.47	0.78
100204903	2		52	2	3	2	2	2	2	130	129	129	129.333	80	81	80	80.3333	155	54	72.6	30.2185	4.73	5.49	5.9	2.86	1.51	3.34
100204911	2	1	54	2	3	2	2	2	2	130	132	130	130.667	70	71	71	70.6667	161	62	76	29.3199	4.61	6.98	6	1.63	1.16	3.8
100204912	2	1	44	2	3	2	2	2	2	104	92	97	97.6667	72	67	67	68.6667	163.4	64.5	85.2	31.9106	5.5	10.51	6.2	1.12	1.02	1.7
100204915	2	1	59	1	4	2	2	1	2	127	128	149	134.667	76	73	72	73.6667	154.2	55.2	85.1	35.7899	7.81	12.55	5.6	3.23	1.4	3.52
100204916	2	1	55	2	3	1	2	1	2	140	128	110	126	86	83	76	81.6667	160.4	63.2	84.3	32.7657	5.14	7.23	5.9	1.91	1.29	5.48
100204922	2	2	53	1	4	2	2	2	2	124	125	125	124.667	71	75	72	72.6667	158	50	71	28.441	6.23	11.59	6.9	1.44	1.64	1.96
100204927	2	1	56	2	3	2	2	2	1	130	126	126	127.333	74	76	78	76	152.1	42.5	69.3	29.9554	5.96	5.57	5.9	2.24	1.45	3.59
100204929	2	1	57	1	2	2	2	2	2	109	114	103	108.667	77	76	78	77	150.1	50.2	79.3	35.1975	5.82	10.72	6.1	1.28	1.44	3.11
100204931	2	1	56	2	2	2	2	2	2	113	114	118	115	67	65	66	66	155	59	85	35.3798	5.34	7.69	6	2.43	1.25	3.27
100204936	2	1	50	2	3	2	2	2	2	108	110	108	108.667	82	84	80	82	163	55	72	27.0993	4.81	5.5	5.7	1.31	1.53	2.07
100204937	2	2	52	2	3	2	2	2	2	134	130	130	131.333	82	81	83	82	162.3	54.5	80.7	30.6363	5.09	6.54	5.7	1.86	1.28	3.3
100204941	2	2	57	2	3	2	2	2	2	128	118	121	122.333	78	72	72	74	157.2	68.5	91.2	36.9054	5.1	7.49	5.9	0.89	1.85	2.4
100204942	2	1	53	2	3	2	2	2	2	98	100	100	99.3333	68	70	71	69.6667	150	50	74	32.8889	4.94	7.66	6.3	1.42	1.54	3.86
100204943	2	2	56	1	3	2	2	2	1	116	112	114	114	65	63	64	64	151.6	40.5	66.2	28.8044	5.18	16.44	8	0.86	1.37	3.46
100204946	2	1	55	2	3	2	2	2	2	144	145	133	140.667	93	92	91	92	154.6	68.2	84.2	35.2284	4.94	9.48	5.6	2.81	1.04	2.63
100204947	2	2	49	2	2	2	2	2	2	110	112	110	110.667	66	70	70	68.6667	152	47	74	32.0291	5.15	7.22	5.7	4.35	1.21	1.92
100204948	2	2	52	2	1	2	2	2	2	109	109	109	109	79	79	79	79	155	45	78	32.4662	5.18	5.87	6	1.29	1.8	3.48
100204950	2	1	49	2	3	2	2	2	2	137	142	142	140.333	82	82	82	82	150	65	88	39.1111	5.17	8.82	6	3.1	1.46	4.59
100204951	2	2	58	2	2	2	2	2	2	110	114	114	112.667	66	67	67	66.6667	158	45	67	26.8386	5.59	6.2	5.9	0.55	2.24	2.67
100204952	2		52	2	3	2	2	2	2	120	118	120	119.333	80	78	78	78.6667	150	55	84	37.3333	6.56	7.75	5.5	2.04	1.29	2.62
100204953	2	1	60	2	3	2	2	2	2	118	120	118	118.667	68	70	68	68.6667	156	60	78	32.0513	6.31	11.89	7	2.02	1.4	2.42
100204956	2		44	2	2	2	2	2	2	107	101	102	103.333	69	66	66	67	167.3	72.6	91.3	32.6196	5.2	5.9	6.5	1.3	1.92	2.58
100204961	2	2	49	2	2	2	2	2	2	115	91	98	101.333	67	63	64	64.6667	156.4	51.2	70.4	28.7806	4.74	5.39	5.7	0.82	1.4	2.22
100204963	2	2	49	2	3	2	2	2	1	114	106	108	109.333	78	85	84	82.3333	156.3	58.5	87.6	35.858	5.17	9.41	5.6	2.31	1.53	3.41
100204964	2	1	47	2	2	2	2	2	2	111	116	116	114.333	78	75	78	77	155.6	61.5	86.2	35.6031	5.89	14.45	7.5	1.51	1.35	3.14
100204965	2	2	49	2	2	2	2	2	2	98	100	100	99.3333	68	70	70	69.3333	162	66	80	30.4832	5.21	10.78	5.7	2.05	1.3	3.1
100204971	2	2	74	2	2	2	2	2	2	108	102	96	102	56	52	55	54.3333	153.2	58.4	86.4	36.8126	5.18	6.28	5.8	1.36	1.14	3.35
100204972	2	1	56	2	2	2	2	2	2	122	120	120	120.667	75	73	74	74	152.6	50.5	77.6	33.3237	5.64	6.51	6.3	0.94	1.92	3.72
100204973	2	2	47	2	3	2	2	2	2	114	104	93	103.667	71	63	57	63.6667	158.2	62.1	87.2	34.842	5.43	8.5	5.5	0.51	1.85	2.13
100204976	2	1	42	2	3	2	2	2	2	135	134	132	133.667	80	79	78	79	155	55	89	37.0447	5.34	7.3	4.8	0.7	1.38	2.16
100204977	2		47	2	3	2	2	2	2	110	115	117	114	62	65	68	65	165	57	87	31.9559	5.24	9.9	5.7	1.1	1.6	2.84
100204979	2	1	52	2	4	2	2	2	2	96	97	93	95.3333	66	67	70	67.6667	153.1	52.5	75.6	32.2531	5.35	6.39	5.5	1.77	1.38	4.02
100204980	2	1	40	2	4	2	2	2	2	110	112	113	111.667	60	69	68	65.6667	162	58	80	30.4832	5.07	5.95	5.7	0.77	1.39	2.41
100204982	2	2	54	2	4	2	2	2	2	97	94	96	95.6667	68	69	70	69	157.4	51.2	69.2	27.9317	5.54	6.39	5.6	1.8	1.33	1.76
100204984	2	1	54	2	3	2	2	2	2	114	104	103	107	73	72	73	72.6667	154.3	52.3	78.2	32.8454	5.01	13.12	5.9	1.06	1.97	2.98
100204985	2	2	43	2	4	2	2	2	2	100			100	62			62	158.3	50.5	66.3	26.4577	4.74	5.99	5.2	1.03	2.17	2.75
100204986	2	2	65	2	3	2	2	2	2	149	144	145	146	80	84	80	81.3333	160.2	56.5	84	32.7306	5.91	7.91	6.1	2.64	1.3	4.14
100204987	2		43	2	3	2	2	2	2	120	119	118	119	67	65	62	64.6667	165	60	81	29.7521	5.15	6.3	5.1	1.24	2.06	3.42
100204989	2		64	2	3	2	2	2	2	127	128	130	128.333	68	65	69	67.3333	158	62	89	35.6513	6.1	8.09	6.4	0.87	1.67	3.27
100204992	2	1	52	2	4	2	2	2	2	94	88	86	89.3333	58	56	54	56	166.3	45.5	69.4	25.0943	5.58	7.51	5.9	1.73	1.83	3.41
100204994	2		48	2	3	2	2	2	2	127	126	125	126	74	73	72	73	165	55	81	29.7521	5.11	6.86	5.5	1.22	1.55	2.48
100204998	2	1	47	2	4	2	2	2	2	98	100	100	99.3333	65	67	67	66.3333	158.5	64	80	31.8443	4.62	5.22	5.6	1.07	1.74	1.78
100205002	2	1	53	2	2	2	2	2	2	97	94	95	95.3333	56	50	49	51.6667	149.6	46.3	70.2	31.3671	4.94	5.61	5.8	0.61	1.78	2.61
100205003	2	2	59	2	4	2	2	2	2	150	146	144	146.667	83	78	80	80.3333	160.3	64.4	85.6	33.3125	5.67	9.55	6.5	2.04	1.52	2.12
100205004	2	1	43	2	3	2	2	2	2	116	123	120	119.667	68	65	62	65	156.4	60.2	87.2	35.6486	5.69	10.94	5.5	1.37	1.48	2.66
100205013	2	1	48	2	3	2	2	2	1	130	134	131	131.667	75	79	76	76.6667	156.2	67.4	98.2	40.2485	6.08	11.71	6.6	1.8	1.3	3.62
100205015	2	1	44	2	3	2	2	2	2	110	111	110	110.333	66	60	65	63.6667	164.4	52.1	76.2	28.1937	5.88	5.99	6.1	1	1.48	2.14
100205017	2	2	55	2	2	2	2	2	2	105	109	108	107.333	68	68	67	67.6667	154.9	54.1	81.2	33.8418	5.25	8.38	6.4	1.67	1.79	3.43
100205018	2	2	54	2	3	2	2	1	1	111	119	116	115.333	71	73	72	72	160.8	60.6	83.2	32.1774	5.82	11.07	6.2	1.66	1.29	3.28
100205024	2	1	56	2	3	2	2	2	2	140	125	129	131.333	81	84	83	82.6667	148.1	42.3	69.2	31.5498	5.11	8.47	5.5	0.68	1.86	3.04
100205025	2	2	50	2	3	2	2	2	1	126	133	130	129.667	105	82	86	91	159.6	58.2	80.9	31.7602	5.63	6.25	6.1	2.06	1.66	4.32
100205027	2	2	49	2	3	2	2	2	2	127	121	125	124.333	90	71	78	79.6667	157.6	52.1	76.2	30.6791	5.03	7.15	6.2	1.68	1.4	3.03
100205033	2	2	57	2	3	2	2	2	2	152	151	150	151	78	70	76	74.6667	154.6	60.9	98.6	41.2532	17.77	32.24	13.9	2.01	1.01	3.78
100205034	2	1	53	2	3	2	2	2	2	120	116	118	118	75	67	68	70	168.5	62.4	88.8	31.2761	5.32	7.43	6.1	1.16	1.21	3.4
100205038	2	2	64	2	4	2	2	2	2	102	106	105	104.333	65	59	64	62.6667	165.5	51.9	75.2	27.455	5.32	8.87	6.1	1.55	1.9	3.53
100205045	2	2	55	2	3	2	2	2	2	101	99	100	100	64	63	62	63	155.4	50.9	71.2	29.4834	5.84	6.41	6.2	0.98	1.95	2.68
100205047	2	1	58	2	3	1	2	2	2	135	134	133	134	97	89	85	90.3333	150.1	58.7	86.2	38.2601	4.78	6.56	5.6	6.08	1.17	2.49
100205051	2	2	55	2	3	2	2	2	1	103	99	100	100.667	58	60	60	59.3333	160.1	55.2	82.9	32.3424	4.78	7.31	6.2	2.65	1.36	3.2
100205053	2	1	53	2	3	2	2	2	2	108	114	110	110.667	77	80	81	79.3333	153.1	55.1	83.2	35.4955	5.56	6.1	5.9	1.81	1.09	3.16
100205055	2	2	49	2	3	2	2	2	2	105	113	112	110	66	66	65	65.6667	156.2	51.8	81.2	33.2808	5.1	7.08	6.3	0.79	1.37	3.15
100205058	2	2	45	2	3	2	2	2	2	95	94	96	95	97	53	69	73	161.3	46.2	65.2	25.0599	5.55	6.81	5.9	1.11	1.77	2.35
100205059	2	1	52	2	4	2	2	2	1	96	86	89	90.3333	52	49	51	50.6667	155.9	53.4	84.5	34.7668	5.39	10.45	6.1	1.37	1.14	2.48
100205060	2	1	48	2	4	2	2	2	2	93	94	95	94	56	54	58	56	158.8	56.6	76.2	30.2172	4.61	10.21	5.9	1.24	1.46	2.73
100205061	2	1	51	2	4	2	2	2	2	121	116	120	119	80	76	80	78.6667	157.1	66.7	85.1	34.4808	4.5	7.88	5.9	0.81	1.61	3.78
100205063	2	2	56	2	2	2	2	2	2	120	115	121	118.667	72	71	70	71	158.1	53.5	76.2	30.4854	5.35	7.41	5.8	1.74	1.76	2.75
100205064	2	2	53	2	3	2	2	2	1	106	114	109	109.667	68	70	69	69	169.7	70.5	93.2	32.3633	5.17	8.56	6.4	1.44	1.28	3.17
100205066	2	1	58	2	2	2	2	2	2	112	111	113	112	73	74	72	73	161.4	61.2	85.2	32.7064	5.26	3.43	5.6	1.15	1.21	2.34
100205067	2	1	42	2	3	2	2	2	2	93	91	92	92	66	53	60	59.6667	155.4	53.2	78.2	32.3821	5.74	7.28	5.8	0.94	1.6	2.54
100205068	2	2	41	2	2	2	2	2	2	94	99	95	96	66	72	68	68.6667	162.4	60.1	75.2	28.5132	5.09	4.85	6.1	0.55	1.4	2.56
100205072	2	1	58	2	3	2	2	2	2	129	121	131	127	65	65	67	65.6667	168.2	60.2	89.2	31.5292	4.87	6.97	6.2	0.9	1.42	2.73
100205074	2	2	53	2	3	2	2	2	2	104	101	99	101.333	71	70	71	70.6667	153.2	53.1	82.3	35.0657	5	7.46	5.8	3.89	1.28	2.76
100205075	2	1	54	2	3	2	2	2	2	154	134	129	139	78	72	68	72.6667	154.4	42.5	64.5	27.0561	6.06	6.08	6.5	1.16	2.5	2.62
100205079	2	1	52	1	3	2	2	2	2	110	111	116	112.333	83	82	78	81	163.8	76.5	93.5	34.8485	13.66	17.85	10.8	> 16.05	1.02	4.13
100205081	2	2	49	2	3	2	2	2	2	157	151	150	152.667	93	89	85	89	154.3	62.1	90.3	37.9276	5.53	7.51	6.3	2.18	1.45	3.9
100205082	2	1	45	2	3	2	2	2	2	116	112	113	113.667	67	60	62	63	155.3	50.9	76.4	31.6775	5.48	5.37	6.5	0.63	1.35	1.76
100205083	2	1	44	2	4				2	108	98	101	102.333	80	76	69	75	163.6	71.3	101.2	37.8106	5.25	10.79	5.6	1.14	1.82	2.9
100205084	2	2	48	2	3	2	2	2	2	109	96	96	100.333	58	56	56	56.6667	164.7	62.8	88.2	32.5148	4.94	9.02	5.8	0.72	1.67	2.16
100205090	2	2	53	2	3	2	2	2	2	97	90	81	89.3333	62	63	62	62.3333	160.8	52.4	79.2	30.6304	5.1	5.8	6	1.25	1.64	2.45
100205092	2	2	54	2	3	2	2	2	2	102	96	105	101	67	62	63	64	160.8	43.8	68.2	26.3762	4.89	7.21	6.2	0.88	1.68	4.13
100205095	2	2	53	2	4		1		2	102	103	96	100.333	57	58	59	58	153.6	49.1	74.2	31.4501	4.41	4.24	7.2	1.06	1.81	4.57
100205097	2	1	58	2	3			2	2	141	126	120	129	81	76	69	75.3333	158.2	59.4	85.2	34.0429	5.12	12.38	6.2	2.03	1.85	8.32
100205098	2	2	44	2	2	2	2	2	2	108	103	114	108.333	70	72	72	71.3333	150.5	62.9	100.2	44.2379	5.28	10.8	5.8	2.55	1.24	2.28
100205100	2	1	40	2	2				2	103	94	93	96.6667	71	68	64	67.6667	153.2	55.4	78.4	33.404	4.92	8.57	5.5	1.09	1.04	3.04
100205101	2	2	57	2	3	2	2	2	2	133	132	131	132	86	78	76	80	144.8	50.3	76.2	36.3428	4.77	7.09	6.1	1.69	1.29	3.28
100205103	2	2	50	2	4	2	2	2	2	111	111	107	109.667	73	73	67	71	159.2	60.4	86.2	34.0111	5.09	7.43	5.7	1.75	1.28	3.51
100205106	2	2	60	2	3	1		2	2	134	140	128	134	63	69	63	65	158.2	67.6	101.8	40.6757	5.72	6.3	7.4	0.89	1.2	2.76
100205111	2	2	46	2	3	2	2	2	2	125	123	124	124	76	81	80	79	157.3	57.2	81.2	32.817	5.53	8.27	5.5	2.05	1.16	3.45
100205112	2		51	1	1	2	2	2	2	110	112	103	108.333	68	70	66	68	163.4	54.6	77.3	28.9518	10.26	15.26	9.6	3.31	1.18	2.79
100205113	2	2	72	2	3	2	2		2	114	112	118	114.667	67	65	66	66	160.9	50.4	73.2	28.2748	4.52	5.4	5.1	1.35	1.68	3.73
100205114	2	1	58	1	3	2	2	2	2	106	97	92	98.3333	55	54	53	54	156.6	55.6	87.6	35.7208	7.58	10.95	6.5	2.32	1.19	3.52
100205116	2	1	54	2	3	2	2	2	2	103	107	100	103.333	76	73	72	73.6667	160.6	65.1	89.2	34.5839	5.33	8.27	6.9	1.68	1.39	3.54
100205120	2	1	48	2	5	2	2	2	1	151	143	151	148.333	84	83	77	81.3333	163.2	67.5	93.1	34.955	5.3	7.43	6.2	1.22	1.49	3.53
100205122	2	1	57	2	2	2	2	2	2	112	111	110	111	75	73	72	73.3333	155.2	48.1	73.2	30.3898	5.26	8.92	6	1.7	1.32	3.65
100205123	2	1	48	2	3	2	2	2	2	114	100	110	108	76	70	71	72.3333	171.6	63.4	87.2	29.613	5.44	5.57	5.8	1.5	0.95	1.85
100205125	2	2	51	2	2	2	2	2	2	109	101	105	105	73	72	74	73	155.4	64.2	90.2	37.3512	5.68	7.18	6.1	2.68	1.31	3.41
100205126	2	1	52	2	4	2	2	2	2	97	88	89	91.3333	69	66	66	67	156.3	52.3	70.3	28.7765	4.91	5.19	5.6	1.78	1.29	5.69
100205127	2		45	2	3	2	2	2	1	101	92	98	97	62	60	63	61.6667	163.4	61.1	78.4	29.3638	5.56	7.23	5.8	1.24	1.51	3.49
100205128	2	2	48	2	4	2	2	2	2	92	85	80	85.6667	56	55	52	54.3333	165.7	51.2	81.6	29.7197	4.42	6.22	5.7	2.52	1.55	2.79
100205129	2	1	59	2	2	2	2	2	1	104	104	112	106.667	66	67	70	67.6667	150.1	38.1	65.1	28.8948	4.77	6.04	5.9	0.9	1.83	2.99
100205132	2	2	52	2	4	2	2	2	2	143	148	136	142.333	87	87	88	87.3333	155.4	54.9	79.8	33.0446	5.28	8.2	6	1.92	1.28	2.9
100205134	2	1	56	2	3	1		1	2	135	124	134	131	92	92	88	90.6667	155.1	51.3	72.3	30.0549	4.95	12.02	6	3.11	1.39	3.75
100205135	2	1	55	1	3	2	2	2	2	120	106	110	112	70	66	62	66	156.2	69.2	93.3	38.2401	6.97	10.67	5.5	3.03	1.41	2.48
100205138	2	2	48	2	2	2	2	2	2	100	93	94	95.6667	64	65	62	63.6667	160.8	64.9	85.2	32.9509	4.95	7.03	5.4	0.75	1.13	2.79
100205144	2	2	56	1	3	2	2	2	2	101	101	101	101	57	57	52	55.3333	157.2	71.5	92.2	37.3101	6.17	12.68	8	1.55	1.45	2.63
100205146	2	2	52	1	4	2	2	2	1	115	111	112	112.667	68	67	67	67.3333	154.3	46.2	71.2	29.9053	5.8	7.91	6.4	4.43	1.26	4.21
100205148	2	2	56	2	3	2	2	2	1	103	105	104	104	59	58	57	58	151.3	48.4	71.4	31.1904	4.64	5.19	5	0.66	2.24	2.32
100205149	2	1	46	2	3	2	2	2	2	129	124	133	128.667	80	76	73	76.3333	151.4	48.2	71.2	31.0619	4.95	6.68	5.6	0.88	1.61	2.91
100205150	2	1	45	2	4	2	2	2	2	88	89	87	88	59	57	56	57.3333	157.1	44.9	66.3	26.8634	4.32	5.54	5.4	1.32	1.47	2.75
100205152	2	1	56	2	1	2	2	2	1	167	169	165	167	89	90	87	88.6667	153.8	53.6	81.3	34.3699	5.01	6.32	5.8	1.17	1.71	3.37
100205154	2	2	44	2	2	2	2	2	2	110	107	109	108.667	73	67	71	70.3333	154.9	52.1	73.2	30.5076	5.73	5.52	5.4	1.73	1.83	3
100205155	2	1	58	2	2	1		2	2	111	106	109	108.667	73	64	63	66.6667	159.4	55.3	78.2	30.7773	6.09	9.07	5.7	1.33	1.31	3.3
100205156	2	1	55	2	4	2	2	2	2	147	142	138	142.333	22	77	72	57	162.1	62.3	84.2	32.044	5.05	7.12	5.9	1.69	1.27	2.71
100205157	2	1	59	1	2	2	2	2	2	109	101	102	104	57	56	55	56	149.5	49.6	84.2	37.673	5.49	10.26	6.6	1.67	1.74	2.5
100205158	2	1	59	2	2	2	2	2	1	98	122	92	104	71	73	63	69	146.6	37.2	69.2	32.1987	6.22	10.29	7.6	0.71	1.83	3.19
100205161	2	2	55	2	2	2	2	2	2	111	106	110	109	67	67	67	67	151.8	44.9	70.2	30.4645	5.37	5.86	6	0.84	2.13	3.36
100205162	2	2	54	2	2	1	2	2	2	130	128	128	128.667	80	78	80	79.3333	164	75	83	30.8596	6.41	9.74	6.2	2.51	1.15	2.35
100205163	2	1	59	2	2	1	2	2	2	126	113	119	119.333	68	62	65	65	158.8	55.1	87.2	34.5792	5.29	8.46	6.3	1.14	1.4	3.07
100205164	2	2	56	2	3	2	2	2	2	110	104	111	108.333	77	72	73	74	154.2	56.7	81.2	34.1497	5.31	7.8	6.4	1.76	1.68	2.44
100205166	2	2	56	2	3	2	2		2	125	111	112	116	59	56	55	56.6667	160.1	54.5	78.2	30.5087	5.25	7.27	5.2	0.98	1.35	3.01
100205169	2	2	60	2	5	2	2	2	1	137	130	131	132.667	91	89	85	88.3333	152.6	50.2	79.2	34.0107	5.37	8.63	6.4	1.6	1.39	3.21
100205171	2	1	58	2	2	1	2	2	2	149	135	125	136.333	85	81	81	82.3333	151.5	56.2	87.2	37.9919	6.18	8.9	6.6	1.97	1.61	3.53
100205174	2	1	54	2	4	2	2	2	2	109	101	110	106.667	77	71	70	72.6667	169.8	55.4	75.2	26.0821	5.65	6.33	6.2	1.27	1.27	2.79
100205175	2	2	50	2	3	2	2	2	2	116	111	115	114	74	73	75	74	154.6	59.4	93.2	38.9939	5.64	9.28	5.7	4.34	1.06	2.56
100205178	2	1	57	2	3	2	2	2	2	124	114	120	119.333	80	68	69	72.3333	153.5	45.3	70.1	29.751	5.55	8.15	5.7	1.06	1.67	2.79
100205179	2	2	52	2	3	1	2		1	126	124	125	125	80	77	78	78.3333	152.6	48.9	73.1	31.3912	5.14	6.64	6.4	1.41	1.4	3.5
100205181	2		49	2	3	2	2	2	2	127	124	125	125.333	80	80	80	80	162.1	59.4	82.2	31.2828	5.39	9.25	6.2	1.83	1.67	2.73
100205183	2	2	53	2	2	1	2	2	2	103	102	105	103.333	71	65	70	68.6667	162.4	50.1	74.2	28.134	4.4	6.24	5.9	1.03	1.44	2.4
100205185	2	1	53	1	3	2	2	2	2	135	141	137	137.667	80	71	72	74.3333	171.2	66.1	97.2	33.1634	15.15	18.46	13	1.94	1.45	2.97
100205186	2		48	2	4	2	2	2	2	98	92	91	93.6667	62	56	57	58.3333	159.6	42.5	67.2	26.3817	4.59	3.98	5.6	0.47	2.04	2.63
100205187	2	1	50	2	3	2	2	2	1	137	128	130	131.667	81	77	78	78.6667	159.1	64.2	87.2	34.449	5.21	10.35	6.6	4.2	1.01	1.72
100205189	2	1	49	2	4	2	2	2	2	147	145	137	143	87	86	85	86	156.6	53.1	77.9	31.7654	5.35	8.75	6.1	1.42	1.6	3.08
100205192	2	1	43	2	1	2	2	2	2	123	117	120	120	71	66	65	67.3333	156.2	49.9	73.2	30.0019	5.82	6.2	6.3	0.68	1.38	2.01
100205194	2	2	59	2	2	2	2	2	2	138	136	136	136.667	91	88	87	88.6667	151.8	59.5	90.2	39.1438	5.4	10.87	6	1.15	1.12	2.27
100205197	2	2	48	2	3	2	2	2	1	125	119	120	121.333	84	76	78	79.3333	167.4	70.5	98.3	35.0786	5.35	8.86	5.9	0.92	1.46	3.02
100205205	2	1	55	1	3	2	2	2	2	110	111	114	111.667	64	64	61	63	145.1	35.1	66.1	31.3954	6.05	15.08	10.1	0.76	1.97	2.65
100205207	2	1	55	2	2	2	2	2	1	123	128	130	127	86	79	80	81.6667	161.2	49.1	71.1	27.3615	4.56	5.6	5.8	0.74	1.63	1.67
100205208	2	1	46	2	3	2	1	1	2	129	132	132	131	85	83	84	84	155.3	56.1	89.1	36.9432	5.22	9.22	5.5	2.86	1.27	2.74
100205211	2	2	52	2	4	2	2	2	1	131	137	137	135	82	84	85	83.6667	156.3	50.2	72.1	29.5133	5	5.05	6	1.59	1.43	3.14
100205214	2	2	44	2	3	2	2	2	2	130	127	128	128.333	89	88	86	87.6667	159.2	66.5	87.1	34.3662	4.75	12.6	6.6	2.15	1.38	3.24
100205215	2		47	2	2	2	2	2	2	111	106	107	108	65	64	60	63	145.1	44.5	74.2	35.2427	5.57	10.05	5.8	0.66	1.71	2.98
100205216	2	2	44	1	2	2	2	1	1	133	119	118	123.333	72	65	62	66.3333	154.2	50.1	82.1	34.5282	8.93	18.14	9.6	1.93	1.39	4.08
100205218	2	2	58	2	2	2	2	2	2	147	141	136	141.333	75	75	74	74.6667	153.1	67.1	95.2	40.615	5.95	9.83	6.9	1.24	1.56	2.17
100205220	2	1	61	2	2	2	2	2	2	142	134	133	136.333	78	71	71	73.3333	158.2	66.5	95.2	38.0386	5.88	9.81	6.7	2.35	1.19	2.41
100205223	2	1	46	2	2	2	2	2	2	83	83	87	84.3333	59	67	65	63.6667	154.1	43.5	78.2	32.9307	5.76	16.58	6.4	3.5	1.74	5.67
100205224	2	1	46	2	4	2	2	2	1	114	105	104	107.667	64	58	60	60.6667	164.1	54.1	75.2	27.9255	5.05	4.92	5.7	0.84	1.89	1.8
100205226	2	2	46	2	3	2	2	2	2	98	98	98	98	72	66	68	68.6667	151.2	45.1	64.1	28.0385	5.49	4.65	6.2	1.03	0.97	3.48
100205229	2	1	52	2	3	2	2	2	1	113	106	106	108.333	71	68	68	69	156.1	76.5	100.2	41.1208	4.87	6.11	6.1	2.57	1.3	3.25
100205230	2	1	58	2	2	2	2	2	2	135	134	136	135	70	72	70	70.6667	150.1	56.5	92.1	40.8788	5.57	7.82	6.8	1.99	1.17	2.35
100205238	2	1	55	2	2	2	2	2	2	109	113	113	111.667	72	67	70	69.6667	151.2	53.1	82.1	35.912	4.68	6.01	5.7	1.46	1.37	3.23
100205239	2	2	42	2	2	2	2	2	1	101	94	96	97	67	68	68	67.6667	159.1	46.2	76.2	30.1033	4.65	5.68	6	0.87	1.63	3.42
100205240	2	1	56	2	3	2	2	2	2	108	124	114	115.333	75	87	74	78.6667	162.3	53.5	77.1	29.2696	4.88	8.77	6.6	1.43	1.7	4
100205243	2		73	2	3	1	2	2	2	149	148	147	148	72	71	70	71	155.2	61.5	93.4	38.776	6.19	10.19	5.9	2.99	1.12	2.74
100205244	2	1	57	2	3		2	2	2	161	142	143	148.667	67	72	71	70	150.1	48.5	84.1	37.328	5.03	7.99	6.9	2.02	1.13	2.65
100205249	2	1	58	2	2	2	2	2	2	136	111	120	122.333	65	72	70	69	158.2	66.2	81.3	32.4846	4.7	6.5	5.9	0.87	1.71	2.79
100205250	2	1	54	2	3	2	2	2	2	108	112	104	108	64	59	58	60.3333	147.2	59.2	91.3	42.1362	4.67	6.46	6.5	1.49	1.38	3.24
100205251	2	1	46	2	4	2	2	2	1	137	127	128	130.667	82	85	84	83.6667	159.2	64.5	88.1	34.7608	5.39	9.03	6.7	1.93	1.7	3.08
100205253	2	1	62	2	4	2	1	2	2	133	132	139	134.667	75	73	75	74.3333	155.2	45.2	68.3	28.3555	5.09	8.43	6.5	2.29	1.71	4.84
100205254	2	1	42	2	2	2	2	2	2	98	102	95	98.3333	66	69	66	67	161.2	53.2	73.2	28.1696	4.85	5.19	5.5	0.62	1.74	2.13
100205257	2	1	41	2	2	2	2	2	2	105	101	100	102	70	66	64	66.6667	164.1	58.1	76.2	28.2968	5.18	5.41	5.8	1.54	1.28	2.11
100205258	2	1	53	2	4	2	2	2	1	136	127	128	130.333	78	78	78	78	161.3	63.5	83.2	31.9782	5.13	6.13	5.9	0.55	1.74	3.08
100205259	2	2	53	2	3	2	2	2	2	126	131	137	131.333	86	81	84	83.6667	150.1	51.5	78.2	34.7093	4.82	7.79	6.3	1.36	1.28	3.89
100205261	2	2	53	1	3	2	2	2	2	114	119	109	114	75	59	72	68.6667	165	65.1	90.1	33.0946	12.78	14.74	11.3	2.22	1.48	3.65
100205265	2	1	55	2	3	2	2	2	2	132	125	124	127	67	73	74	71.3333	162.2	57.1	80.1	30.446	5.08	8.08	6	3.61	0.99	1.85
100205267	2	1	58	2	2	2	2	2	2	127	127	130	128	79	84	84	82.3333	166.3	64.5	93.1	33.664	4.88	8.31	5.8	6.89	1.05	2.76
100205270	2	2	49	2	4	2	2	2	2	85	83	85	84.3333	55	56	54	55	164.1	57.1	77.2	28.6682	5.14	5.57	5.8	1.04	1.35	2.73
100205271	2	1	43	2	2	2	2	2	2	131	116	118	121.667	74	77	74	75	146.2	52.5	79.1	37.0068	4.93	7.35	5.7	0.88	1.32	2.34
100205274	2	2	59	2	3	2	2	2	2	110	111	112	111	69	70	72	70.3333	166.3	59.1	80.1	28.9633	5.41	5.72	6.2	1.03	2.58	3.56
100205275	2	2	54	2	4	2	2	2	1	97	99	100	98.6667	57	60	61	59.3333	148.3	43.5	69.1	31.4192	5.19	5.17	6.5	0.97	1.89	2.67
100205282	2	1	51	2	4	1	2	1	1	147	151	143	147	95	102	98	98.3333	154.3	62.5	91.2	38.3057	5.32	7.32	5.6	0.78	1.47	2.71
100205286	2	2	51	2	3	2	2	2	2	106	105	106	105.667	62	62	64	62.6667	155.1	44.2	67.2	27.9348	5.05	6.64	5.9	0.77	1.54	2.8
100205289	2	2	46	2	3	2	2	2	1	108	112	110	110	66	61	68	65	155.1	50.2	78.2	32.5075	5.44	6.49	6.3	0.97	1.57	3.37
100205291	2	2	52	2	1	2	2	2	2	139	142	141	140.667	96	89	92	92.3333	152.3	55.5	84.1	36.2574	5.09	4.78	5.9	0.74	1.43	2.92
100205298	2	2	56	2	2	2	2	2	2	111	117	118	115.333	71	66	72	69.6667	156.2	43.5	76.3	31.2725	5.26	7.98	5.8	1.62	1.25	2.75
100205301	2	1	60	2	3	2	2	2	2	124	119	119	120.667	81	79	81	80.3333	155.2	54.3	85.2	35.3717	5.03	7.12	6	1.63	1.24	3.78
100205304	2	1	58	2	2	2	2	2	2	94	107	98	99.6667	62	55	60	59	155.2	60.2	82.3	34.1678	5.07	7.77	6.3	2.02	1.4	2.69
100205305	2	1	50	2	3	2	2	2	1	133	130	128	130.333	80	79	78	79	157.2	65.3	88.3	35.7319	6.69	8.25	6	9.82	0.89	3.13
100205307	2		62	2	4	2	2	2	2	115	107	110	110.667	58	59	60	59	150.2	53.3	80.4	35.6382	5.59	6.74	5.9	1.01	1.89	2.25
100205308	2	1	58	2	3	2	2	2	2	160	151	157	156	109	97	94	100	160.4	65.3	93.2	36.2249	5.22	7.51	6.4	1.65	1.52	5.04
100205312	2	1	72	2	1	2	2	2	1	138	141	141	140	72	81	79	77.3333	155.2	56.2	94.2	39.1082	5.7	8.23	5.9	2.19	0.89	1.86
100205315	2	1	48	2	1	2	2	2	2	121	114	116	117	78	78	76	77.3333	154.3	55.5	84.2	35.3655	6.41	9.17	6	1.45	1.5	2.9
100205317	2	1	62	2	1	2	2	2	2	145	131	118	131.333	60	62	66	62.6667	156.3	66.2	92.3	37.7819	6.74	9.75	6.4	3.33	1	2.94
100205318	2	1	61	2	3	1	2	2	1	153	147	146	148.667	95	96	96	95.6667	152	54.2	84.2	36.4439	5.31	6.81	6.4	0.98	1.56	2.26
100205319	2	2	55	2	2	2	2	2	2	117	132	130	126.333	79	82	80	80.3333	152.2	53.5	90.1	38.8952	5.43	10.22	5.8	2.47	0.87	1.66
100205323	2	2	43	2	3	2	2	2	2	121	119	120	120	78	76	78	77.3333	158.2	41.5	67.1	26.8108	5.31	10.32	5.8	1.01	1.59	1.94
100205324	2	1	62	2	2	1	2	2	2	151	158	155	154.667	100	100	98	99.3333	152.2	50.1	79.1	34.1466	5.29	8.18	6.2	2.31	1.27	3.33
100205326	2	1	55	2	4	2	2	2	2	118	121	107	115.333	67	61	65	64.3333	165	65	90	33.0579	4.84	6.42	6	1.02	1.5	1.75
100205328	2	1	53	2	2	2	2	2	2	100	105	112	105.667	65	70	72	69	148.2	43.2	84.1	38.2913	5.57	7.56	5.7	1.07	1.72	2.73
100205329	2	1	58	2	4	2	1	2	2	155	150	145	150	85	81	79	81.6667	145.3	44.5	78.2	37.0404	5.57	9.92	6.4	4.27	1.48	1.91
100205331	2		57	1	2	1	2	2	2	140	129	139	136	81	83	83	82.3333	158.3	56.3	100.2	39.9858	8.4	14.66	9.8	1.73	1.55	3.66
100205334	2	2	46	2	3	1		2	2	119	127	122	122.667	97	80	79	85.3333	154.2	54.5	84.2	35.4114	4.46	9.39	5.8	0.91	1.55	3.29
100205336	2	1	54	1	2	2	2	2	2	113	120	96	109.667	67	64	58	63	150.2	46.5	69.2	30.6737	7.27	12.23	8.9	1.26	1.66	3.74
100205338	2		73	2	1	2	2	2	2	126	125	119	123.333	74	72	69	71.6667	151	58	75	32.8933	6.16	7	6	0.97	2.11	2.59
100205342	2	2	57	2	4	2	2	2	1	114	116	118	116	79	78	78	78.3333	151.2	46.3	71.2	31.1441	5.29	4.23	6.3	1.01	2.37	2.41
100205343	2	1	60	2	4	1	2	2	2	142	155	154	150.333	102	96	99	99	150.1	66.5	93.2	41.367	5.34	6.17	6.6	1.44	1.47	2.43
100205345	2	1	47	2	3	2	2	2	2	116	111	112	113	74	71	69	71.3333	155.8	50.8	76.2	31.3921	5.39	5.62	6.1	1.67	1.96	3.15
100205347	2		72	1	3	1	2	2	2	147	150	151	149.333	85	86	87	86	152	60	82	35.4917	6.69	14.39	6.7	5.23	1.22	2.7
100205348	2	1	61	1	3	2	2	2	2	140	145	132	139	82	82	83	82.3333	148.8	49.3	76.6	34.5958	7.05	18.95	6.6	3.12	1.25	2.38
100205355	2		57	2	2	2	2	2	2	120	119	115	118	68	62	65	65	150	50	81	36	4.94	8.95	6.3	1.42	1.48	3.15
100205357	2		49	2	3	2	2	2	2	107	107	112	108.667	63	63	65	63.6667	165	120	83	30.4867	5.49	7.57	6.3	2.03	1.53	3.59
100205358	2	1	57	2	1	2	2	2	2	114	124	120	119.333	82	76	73	77	157.8	61.6	88.3	35.4607	5.08	4.87	6.3	1.73	1.41	3.09
100205359	2	2	45	2	3	2	2	2	2	94	94	93	93.6667	61	55	57	57.6667	156.1	43.1	65.5	26.8804	4.58	7.73	5.7	0.76	1.66	1.89
100205360	2	2	54	2	3	2	2	2	2	108	111	101	106.667	56	57	54	55.6667	155.3	59.1	81.8	33.9165	5.53	7.18	6.4	1.03	1.21	2.79
100205364	2	1	58	2	3	2	2	2	2	118	130	130	126	72	66	68	68.6667	158.4	52.5	78.4	31.2468	5.02	5.68	6	1.28	1.48	3.45
100205365	2		45	2	3	2	2	2	2	104	102	112	106	72	65	66	67.6667	157.3	39.2	63.4	25.6231	4.32	6.43	6.2	0.67	2.01	2.3
100205366	2	1	51	2	3	2	2	2	2	102	105	110	105.667	80	75	80	78.3333	155	48	75	31.2175	5.21	8.77	6.1	0.65	1.82	2.96
100205369	2	2	51	2	2	2	2	2	2	122	112	112	115.333	81	77	82	80	152.5	53.4	79.4	34.1414	4.86	7.8	6.5	1.3	1.96	2.68
100205375	2	2	59	1	3	2	2	2	1	162	150	154	155.333	79	84	85	82.6667	155.2	50.4	79.4	32.9638	7.64	11.42	7	1.34	1.28	3.78
100205378	2	1	46	2	3	2	2	2	2	107	98	105	103.333	60	61	58	59.6667	168.2	68.5	82.1	29.0196	5.92	9.33	6	1.02	1.12	1.78
100205383	2	1	48	2	3	2	2	2	1	102	102	100	101.333	78	78	76	77.3333	151	53	74	32.4547	5.24	6.94	6.4	1.68	1.37	3.34
100205384	2	1	61	2	3	2	2	2	2	104	122	130	118.667	66	67	62	65	150.1	55.1	89.1	39.5473	5.81	5.82	6.7	1.05	1.61	4.45
100205387	2	2	57	2	5	2	2	2	2	121	114	116	117	79	77	78	78	161.5	56.6	74.3	28.4868	5.44	4.36	6.5	1.37	1.41	3.78
[truncated: 1,927 more rows]
